# Supplementary material
Source: PubMed Central journal article supplement (PMC7997617)
Supplement: ry203531suppa1.pdf [file ry203531suppa1.pdf]

## **Appendix E1**

### **Supplemental Methods**

#### **Cohort Description**

Both the COPDGene and ECLIPSE study cohorts have been described in detail previously and details regarding the cohorts as well as lists of investigators and prior publications describing other analyses of these cohorts are available in Appendices 3–6 (11,12). Briefly, the COPDGene Study is a multicenter longitudinal observational investigation of smokers focused on the epidemiologic and genetic factors associated with COPD (12). The majority of the participants are current and former smokers with and without COPD, and the study includes baseline 5 year and 10 year follow-up visits. The baseline and 5-year follow-up visits are complete. The 10-year follow-up visits are still ongoing, and thus for this current work those participants who completed both the baseline and 5-year follow-up visits were included. Mortality was assessed through the COPDGene long-term follow-up program and from the social security death index (13). Cause specific mortality information was obtained and adjudicated by the COPDGene death adjudication committee (41). Imaging was performed between November 2007 and July 2017 for COPDGene and the COPDGene specific datasets used for this study include the phase 1 and phase 2 dataset from March 2019 and the mortality dataset from October 2018.

The ECLIPSE study was a 3-year multicenter longitudinal study comprised of participants with COPD and a smaller number of smoking and never-smoking controls, with aims that included the identification of biomarkers that correlated with COPD subtypes and predicted disease progression. Assessments of disease severity, including pulmonary function and CT imaging were obtained at multiple time points, the latter specifically at baseline, one year and three years of follow-up. Longitudinal follow-up included assessment of all-cause mortality for a total of 8 years (5 years after the 3-year follow-up visit) (11). Imaging and clinical assessments were performed between January 2006 and March 2010 and the specific dataset used for this study was generated April 2015.

All participants from both cohorts who had complete longitudinal and mortality follow-up data as described above as well as complete baseline data with regard to the covariates for the multivariable analyses below were included in this current study with the exception of never-smokers, who were excluded other than for establishing the progression thresholds described below.

#### **Image Acquisition**

For COPDGene participants, volumetric CT scans of the chest were performed at both maximal inflation and relaxed exhalation without the administration of intravenous contrast. Images were acquired with the following CT protocol: for General Electric (GE) LightSpeed-16, GE VCT-64, Siemens Sensation-16 and-64, and Philips 40- and 60-slice scanners with 120kVp, 200mAs, and 0.5s rotation time. Images were reconstructed in an axial plane using a standard algorithm at 0.625 mm slice thickness and 0.625 mm intervals for GE scanners; using a B31f algorithm at 0.625 (Sensation-16) or 0.75 mm slice thickness and 0.5 mm intervals for Siemens scanners; and

using a B algorithm at 0.9 mm slice thickness and 0.45 mm intervals for Philips scanners. For ECLIPSE participants, volumetric CT scans of the chest were performed at full inspiration without the administration of intravenous contrast (120 kV peak, 40mA) and reconstructed in an axial plan with 1.00 (Siemens) or 1.25 mm (GE) contiguous slices and a low spatial frequency reconstruction algorithm (GE: Standard, Siemens b35f).

## Emphysema Quantification and Definition

Multiple approaches have been taken to quantifying and defining the presence of emphysema on CT (7,9,16,26). For this study, we defined a participant as having emphysema at baseline if they had more than the “normal” amount of low attenuation area (LAA) on Chest CT (3). More specifically, we classified participants as having emphysema at baseline if they had greater than the upper limit of normal amount of tissue with a density of less than -950 Hounsfield units (HU) as defined by work from the Multi-Ethnic Study of Atherosclerosis (MESA) cohort (16).

Similarly, multiple approaches have been used to measure and define emphysema progression using CT (7,9,42). Recently, extensive work by the Quantitative Imaging Biomarkers Alliance (QIBA), a group organized by the Radiological Society of North America (RSNA) (qibawiki.rsna.org), has led to a clear approach that enables reliable, repeatable of quantitative measures of lung density and emphysema outside of the research setting (17). Based on this work, we quantified emphysema for the purposes of measuring progression using a volume adjusted percentile density method: the volume adjusted lung density measured at the 15th percentile of the CT lung density histogram (Lung Density Perc15) (Fig 1 in the primary manuscript) (17).

To calculate Lung Density Perc15, the lung attenuation for each CT voxel measured in Hounsfield units, is first translated into a more general measure of density, grams per liter (g/L) using a simple formula:

$$\text{Density}(\text{grams per liter}) = \text{Attenuation}(\text{Hounsfield Units}) + 1000 .$$

The frequency of lung density measures for the entire lung, ie, the lung density histogram, is then used to identify the 15th percentile of lung density (Fig 1 in the primary manuscript). Because lung volume is a critical determinant of lung density this number is then adjusted for lung volume using the sponge model (17,18):

$$\text{Volume adjusted lung density Perc15} = \text{Measured lung density Perc15} \cdot \left( \frac{\text{Measured CT Lung Volume}}{\text{Predicted CT Lung Volume}} \right),$$

where “measured lung density Perc15” is the raw value measured from the histogram, “measured CT lung volume” is the total volume of the voxels in the lungs after segmentation from the surrounding structures, and “predicted CT lung volume” is that predicted from equations generated from normal individuals with no smoking history (16–18). Using this approach, increases in emphysema are expressed as decreases in density (ie, a lower Lung Density Perc15 indicates more emphysema) (Fig 1 in the primary manuscript).

Emphysema progression was analyzed using two general approaches: For the primary analyses, the annualized rate of change in Lung Density Perc15 was analyzed as a continuous predictor. Thus, the effects shown are for the association between a 1 g per liter per year faster rate of decline in density (increase in emphysema). Secondary, dichotomized analyses were then

performed comparing “progressors” with “non-progressors.” For these analyses, progression was defined in one of two ways. The first was based on having a decrease in density more than the test-to-test variability, ie, the repeatability coefficient of Lung Density Perc15. The aforementioned work by QIBA on emphysema quantification found that a decrease of at least 11 g/L in lung density was required for the detection of an increase in the extent of emphysema with 95% probability (17). Thus, those individuals referred to as “progressors” for the first part of the dichotomized analyses are those who had a decrease in the Lung Density Perc15 of at least 11 g/L (the repeatability coefficient), and those who are “non-progressors” are the remainder of the individuals in the cohort. The second definition of progression for the dichotomized analyses was based on the minimum clinically important difference (MCID) derived from individuals who have never smoked and who have no lung disease, termed “never-smoking normals.” For this definition, we pooled never-smoking normal participants who had longitudinal imaging data from the COPDGene and ECLIPSE cohorts and calculated a distribution based MCID, ie, the rate of decline in Lung Density Perc15 that is 1/2 standard deviation faster than the mean rate of decline for normal individuals (-1.22 g per liter per year) (43). Thus, those individuals referred to as “progressors” for the second portion of the dichotomized analyses are those who had a rate of decline in their Lung Density Perc15 of at least -1.22 g per liter per year, and those who are “non-progressors” are the remainder of the individuals in the cohort.

## Statistical Analysis

Differences in the annualized rate of decline in Lung Density Perc15 were analyzed using *t* tests. The association between emphysema progression and mortality, was analyzed using multivariable Cox regression with adjustments made for both baseline and longitudinal variables including race, gender, baseline age, baseline smoking status, baseline pack years, baseline forced expiratory volume in one second (FEV1), baseline six minute walk distance, baseline Lung Density Perc15, change in smoking status, annualized rate of change in FEV1 and annualized rate of change in six minute walk distance (16,17,19–22). All of the covariates were assessed using the Schoenfeld residuals method and none were found to violate the proportional hazards assumption (44). To visualize the survival of progressors compared with nonprogressors adjusted survival curves were created using the Cox models and the corrected group prognosis method (45–47). To determine the relationship between emphysema progression and respiratory mortality, cause specific mortality analyses were performed in the COPDGene cohort, using the Fine and Gray method of accounting for competing risk (48). Due to a smaller number of events and to avoid overfitting, respiratory mortality was analyzed using multivariable Cox regression adjusted for a limited number of covariates (age, gender and race).

Finally, to determine whether the addition of longitudinal imaging data improved the prediction of subsequent mortality, we compared the model fit of multivariable Cox models containing all of the demographic and exposure covariates from the primary analyses and combinations of: baseline Lung Density Perc15 and/or FEV1, and longitudinal Lung Density Perc15 and/or FEV1. Model fit and parsimony were quantified using Akaike Information Criteria (AIC) while differences in model fit for the nonnested models, such as those comparing the relative performance of baseline imaging to baseline spirometry were assessed using partial likelihood ratio tests, and differences in model fit for nested models, such as those comparing the relative performance of baseline imaging to longitudinal imaging (the latter of which includes baseline measures) were assessed using likelihood ratio tests (23–25).

All statistical tests were two sided and *P* values of less than 0.05 were taken to indicate statistical significance. All analyses were performed in R (version 4.0.3, R Foundation for Statistical Computing, Vienna, Austria), implemented using RStudio (Version 1.3.1093, Boston, MA) and using the tidyverse, survival, survminer, cmprsk, and nonnestcox packages.

## References

41. McGarvey LP, John M, Anderson JA, Zvarich M, Wise RA; TORCH Clinical Endpoint Committee. Ascertainment of cause-specific mortality in COPD: operations of the TORCH Clinical Endpoint Committee. *Thorax* 2007;62(5):411–415.
42. Diaz AA, Strand M, Coxson HO, et al. Disease severity dependence of the longitudinal association between CT lung density and lung function in smokers. *Chest* 2018;153(3):638–645.
43. Puhan MA, Chandra D, Mosenifar Z, et al. The minimal important difference of exercise tests in severe COPD. *Eur Respir J* 2011;37(4):784–790.
44. Schoenfeld D. Partial residuals for the proportional hazards regression model. *Biometrika* 1982;69(1):239–241.
45. Therneau TM, Crowson CS, Atkinson EJ. Adjusted Survival Curves. <https://cran.r-project.org/web/packages/survival/vignettes/adjcurve.pdf>. Published 2015. Accessed January 25, 2021.
46. Nieto FJ, Coresh J. Adjusting survival curves for confounders: a review and a new method. *Am J Epidemiol* 1996;143(10):1059–1068.
47. Ghali WA, Quan H, Brant R, et al. Comparison of 2 methods for calculating adjusted survival curves from proportional hazards models. *JAMA* 2001;286(12):1494–1497.
48. Fine JP, Gray RJ. A Proportional Hazards Model for the Subdistribution of a Competing Risk. *J Am Stat Assoc* 1999;94(446):496–509.

**Table E1A: Characteristics of those with Emphysema in the COPD Gene Cohort**

|                                                          | Subgroup       | Visit 1     | Visit 2     |
|----------------------------------------------------------|----------------|-------------|-------------|
| <b>Demographic and other Characteristics</b>             |                |             |             |
| n                                                        |                | 2097        | 2097        |
| Age (Years) (mean (SD))                                  |                | 60 (9)      | 66 (9)      |
| Gender (%)                                               | Male           | 985 (47.0)  | 985 (47.0)  |
|                                                          | Female         | 1112 (53.0) | 1112 (53.0) |
| Race (%)                                                 | White          | 1365 (65.1) | 1365 (65.1) |
|                                                          | Black          | 732 (34.9)  | 732 (34.9)  |
| Smoking Status (%)                                       | Former Smoker  | 817 (39.0)  | 1138 (54.3) |
|                                                          | Current Smoker | 1280 (61.0) | 959 (45.7)  |
| Pack Years (mean (SD))                                   |                | 46.4 (25.1) | 48.2 (25.3) |
| Time between CT and PFTs (Days) (mean (SD))              |                | 1.2 (16.9)  | 0.9 (14.1)  |
| Time between Visit 1 and Visit 2 CTs (Years) (mean (SD)) |                |             | 5.5 (0.8)   |
| <b>Pulmonary Function</b>                                |                |             |             |
| Post Bronchodilator FEV1 (L) (mean (SD))                 |                | 2.0 (0.9)   | 1.8 (0.9)   |
| Post Bronchodilator FVC (L) (mean (SD))                  |                | 3.3 (1.0)   | 3.0 (1.0)   |
| Gain or Loss of FEV1 (%)                                 | Gained FEV1    |             | 351 (16.7)  |
|                                                          | Lost FEV1      |             | 1746 (83.3) |

| <b>Baseline Quantitative CT Measures</b>                                                                                                       |                                                                              |              |              |
|------------------------------------------------------------------------------------------------------------------------------------------------|------------------------------------------------------------------------------|--------------|--------------|
| Total Lung Capacity by CT (L) (mean (SD))                                                                                                      |                                                                              | 5.8 (1.4)    | 5.6 (1.5)    |
| Total Lung Capacity by CT (% Predicted) (mean (SD))                                                                                            |                                                                              | 112.4 (15.9) | 112.4 (17.4) |
| Volume Adjusted Lung Density measured at the 15th percentile of the lung density histogram (Lung Density Perc15) (grams per liter) (mean (SD)) |                                                                              | 73.2 (25.1)  | 74.6 (28.2)  |
| <b>Longitudinal Change in Quantitative CT Measures</b>                                                                                         |                                                                              |              |              |
| Gain or Loss of Emphysema based on the Change in Lung Density Perc15 Relative to Repeatability Coefficient (RC) (%)                            | Gained Emphysema by Lung Density Perc15 (absolute change > RC)               |              | 387 (18.5)   |
|                                                                                                                                                | No Change or Loss in Emphysema by Lung Density Perc15 (absolute change < RC) |              | 1710 (81.5)  |
| Rate of Emphysema Progression Relative to Distribution Based Minimum Clinically Important Difference (%)                                       | Rate of progression faster than never-smoking normals                        |              | 617 (29.4)   |
|                                                                                                                                                | Rate of progression not faster than never-smoking normals                    |              | 1480 (70.6)  |
| <b>Mortality</b>                                                                                                                               |                                                                              |              |              |
| Mortality Rate (%)                                                                                                                             | Alive                                                                        |              | 1921 (91.6)  |
|                                                                                                                                                | Dead                                                                         |              | 176 (8.4)    |
| Survival Duration from Enrollment (Years) (mean (SD))                                                                                          |                                                                              |              | 8.2 (1.2)    |

**Table E1B: Characteristics of those with Emphysema in the ECLIPSE Cohort**

|                                              | Subgroup                                | Screening   | 1 Year      | 3 Years     |
|----------------------------------------------|-----------------------------------------|-------------|-------------|-------------|
| <b>Demographic and other Characteristics</b> |                                         |             |             |             |
| n                                            |                                         | 1179        | 1124        | 1179        |
| Age (Years) (mean (SD))                      |                                         | 63 (7)      | 63 (7.1)    | 65 (7)      |
| Gender (%)                                   | Female                                  | 453 (38.4)  | 430 (38.3)  | 453 (38.4)  |
|                                              | Male                                    | 726 (61.6)  | 694 (61.7)  | 726 (61.6)  |
| Race (%)                                     | African American/African Heritage       | 25 (2.1)    | 24 (2.1)    | 25 (2.1)    |
|                                              | American Indian or Alaskan Native       | 1 (0.1)     | 1 (0.1)     | 1 (0.1)     |
|                                              | Asian-Central/South Asian Heritage      | 1 (0.1)     | 1 (0.1)     | 1 (0.1)     |
|                                              | Asian-Japanese Heritage                 | 1 (0.1)     | 1 (0.1)     | 1 (0.1)     |
|                                              | Mixed race                              | 2 (0.2)     | 2 (0.2)     | 2 (0.2)     |
|                                              | White-Arabic/North African Heritage     | 2 (0.2)     | 2 (0.2)     | 2 (0.2)     |
|                                              | White-White/Caucasian/European Heritage | 1147 (97.3) | 1093 (97.2) | 1147 (97.3) |
| Clinical Group (%)                           | COPD Subjects                           | 1101 (93.4) | 1050 (93.4) | 1101 (93.4) |
|                                              | Smoker Controls                         | 78 (6.6)    | 74 (6.6)    | 78 (6.6)    |
| Pack Years (mean (SD))                       |                                         | 46.8 (25.7) | 46.7 (25.3) | 46.8 (25.7) |
| Time between CT and PFTs (Days) (mean (SD))  |                                         | 9.6 (39.1)  | 6.4 (22.0)  | 3.4 (35.0)  |
| Time from Baseline CT (Years) (mean (SD))    |                                         | 0.0 (0.0)   | 1.0 (0.1)   | 3.0 (0.2)   |
| <b>Pulmonary Function</b>                    |                                         |             |             |             |
| Post Bronchodilator FEV1 (L) (mean (SD))     |                                         | 1.5 (0.7)   | 1.4 (0.7)   | 1.4 (0.7)   |
| Post Bronchodilator FVC (L) (mean (SD))      |                                         | 3.2 (0.9)   | 3.2 (0.9)   | 3.0 (0.9)   |
| Gain or Loss of FEV1 (%)                     | Gained                                  |             | 510 (45.4)  | 362 (30.8)  |
|                                              | Lost                                    |             | 613 (54.6)  | 815 (69.2)  |
| <b>Baseline Quantitative CT Measures</b>     |                                         |             |             |             |

|                                                                                                                                                |                                                                              |              |              |              |
|------------------------------------------------------------------------------------------------------------------------------------------------|------------------------------------------------------------------------------|--------------|--------------|--------------|
| Total Lung Capacity by CT (L) (mean (SD))                                                                                                      |                                                                              | 6.2 (1.4)    | 6.2 (1.4)    | 6.1 (1.4)    |
| Total Lung Capacity by CT (% Predicted) (mean (SD))                                                                                            |                                                                              | 113.0 (17.4) | 112.2 (18.2) | 111.6 (19.1) |
| Volume Adjusted Lung Density measured at the 15th percentile of the lung density histogram (Lung Density Perc15) (grams per liter) (mean (SD)) |                                                                              | 53.9 (24.0)  | 53.1 (23.4)  | 50.7 (23.8)  |
| <b>Longitudinal Change in Quantitative CT Measures</b>                                                                                         |                                                                              |              |              |              |
| Gain or Loss of Emphysema based on the Change in Lung Density Perc15 Relative to Repeatability Coefficient (RC) (%)                            | Gained Emphysema by Lung Density Perc15 (absolute change > RC)               |              |              | 173 (14.7)   |
|                                                                                                                                                | No Change or Loss of Emphysema by Lung Density Perc15 (absolute change < RC) |              |              | 1006 (85.3)  |
| Rate of Emphysema Progression Relative to Distribution Based Minimum Clinically Important Difference (%)                                       | Rate of progression faster than never-smoking normals                        |              |              | 606 (51.4)   |
|                                                                                                                                                | Rate of progression not faster than never-smoking normals                    |              |              | 573 (48.6)   |
| <b>Mortality</b>                                                                                                                               |                                                                              |              |              |              |
| Mortality Rate (%)                                                                                                                             | Alive                                                                        |              | 915 (77.6)   |              |
|                                                                                                                                                | Dead                                                                         |              | 264 (22.4)   |              |
| Survival Duration from Enrollment (Years) (mean (SD))                                                                                          |                                                                              |              | 6.8 (1.9)    |              |

**Table E2: Association between Rate of Change in Emphysema Progression and Mortality**

| Cohort   | Hazard Ratio | Confidence Interval |       | P      |
|----------|--------------|---------------------|-------|--------|
|          |              | Lower               | Upper |        |
| COPDGene | 1.06         | 1.00                | 1.12  | 0.0499 |
| ECLIPSE  | 1.07         | 1.02                | 1.12  | 0.01   |

<sup>1</sup> Effects expressed as change in the risk of all-cause mortality per 1 g/L/year faster rate of change in density.

<sup>2</sup> Mortality assessed as time since follow-up visit.

<sup>3</sup> All models adjusted for: a) Race and gender; b) Baseline age, smoking status, pack years, forced expiratory volume in one second, six minute walk distance and volume adjusted lung density measured at the 15th percentile of the CT lung density histogram (Lung Density Perc15); c) Change in smoking status, rate of change in forced expiratory volume in one second and rate of change in six minute walk distance.

<sup>4</sup> Results shown are in those with and without emphysema at baseline (all ever smokers).

**Table E3: Association between Emphysema Progression and Mortality (Responder Analysis)**

| Cohort                                                                                              | Hazard Ratio | Confidence Interval |       | P     |
|-----------------------------------------------------------------------------------------------------|--------------|---------------------|-------|-------|
|                                                                                                     |              | Lower               | Upper |       |
| <b>Loss of Density more than the Repeatability Coefficient</b>                                      |              |                     |       |       |
| COPDGene                                                                                            | 1.47         | 1.05                | 2.07  | 0.03  |
| ECLIPSE                                                                                             | 1.32         | 0.91                | 1.93  | 0.15  |
| <b>Rate of Loss of Density Faster than the Minimum Clinically Important Difference' Individuals</b> |              |                     |       |       |
| COPDGene                                                                                            | 1.52         | 1.14                | 2.02  | 0.004 |
| ECLIPSE                                                                                             | 1.61         | 1.19                | 2.18  | 0.002 |

<sup>1</sup> For 'Loss of Density more than the Repeatability Coefficient' the effects are expressed as those with decrease in density (Lung Density Perc15) more than the repeatability coefficient compared with those

who had a decrease in density less than or equal to the repeatability coefficient (Lung Density Perc15), ie, progressors versus nonprogressors.

<sup>2</sup> For 'Rate of Loss of Density Faster than that in 'Never-smoking Normal' Individuals' the effects are expressed as those with a rate of decrease in density (Lung Density Perc15) faster than the minimum clinically important difference as defined by the rate in 'never smoking normals.'

<sup>3</sup> Mortality assessed as time since follow-up visit.

<sup>4</sup> All models adjusted for: a) Race and gender; b) Baseline age, smoking status, pack years, forced expiratory volume in one second, six minute walk distance and volume adjusted lung density measured at the 15th percentile of the CT lung density histogram (Lung Density Perc15); c) Change in smoking status, rate of change in forced expiratory volume in one second and rate of change in six minute walk distance.

<sup>5</sup> Results shown are in those with and without emphysema at baseline (all ever smokers).

**Table 4A: Comparison of Model Performance in the COPDGene Cohort**

| Comparison                                                                 | Akaike Information Criterion |                     | p                                              |                              |
|----------------------------------------------------------------------------|------------------------------|---------------------|------------------------------------------------|------------------------------|
|                                                                            | AIC of First Model           | AIC of Second Model | First Model vs. Second Model (non-nested only) | Second Model vs. First Model |
| <b>Baseline vs. Baseline</b>                                               |                              |                     |                                                |                              |
| Baseline Spirometry vs. Baseline Imaging                                   | 3318.28                      | 3349.52             | 0.04                                           | 0.96                         |
| Baseline Spirometry vs. Baseline Spirometry + Baseline Imaging             | 3318.28                      | 3308.96             | N/A                                            | < 0.001                      |
| Baseline Imaging vs. Baseline Spirometry + Baseline Imaging                | 3349.52                      | 3308.96             | N/A                                            | < 0.001                      |
| <b>Longitudinal vs. Longitudinal</b>                                       |                              |                     |                                                |                              |
| Longitudinal Spirometry vs. Longitudinal Imaging                           | 3294.12                      | 3335.99             | 0.02                                           | 0.98                         |
| Longitudinal Spirometry vs. Longitudinal Spirometry + Longitudinal Imaging | 3294.12                      | 3287.60             | N/A                                            | 0.01                         |
| Longitudinal Imaging vs. Longitudinal Spirometry + Longitudinal Imaging    | 3335.99                      | 3287.60             | N/A                                            | < 0.001                      |
| <b>Baseline vs. Longitudinal</b>                                           |                              |                     |                                                |                              |
| Baseline Spirometry vs. Longitudinal Spirometry                            | 3318.28                      | 3294.12             | N/A                                            | < 0.001                      |

| Comparison                                                                                | Akaike Information Criterion |                     | p                                              |                              |
|-------------------------------------------------------------------------------------------|------------------------------|---------------------|------------------------------------------------|------------------------------|
|                                                                                           | AIC of First Model           | AIC of Second Model | First Model vs. Second Model (non-nested only) | Second Model vs. First Model |
| Baseline Imaging vs. Longitudinal Imaging                                                 | 3349.52                      | 3335.99             | N/A                                            | < 0.001                      |
| Baseline Spirometry + Baseline Imaging vs. Longitudinal Spirometry + Longitudinal Imaging | 3308.96                      | 3287.60             | N/A                                            | < 0.001                      |

<sup>1</sup> All models adjusted for: a) Race and gender; b) Baseline age, smoking status and pack years. All models with longitudinal data also adjusted for change in smoking status, rate of change in forced expiratory volume in one second and rate of change in six minute walk distance.

<sup>2</sup> Baseline models include baseline forced expiratory volume in one second and/or baseline volume adjusted lung density

<sup>3</sup> Longitudinal models include baseline and rate of change in forced expiratory volume in one second and/or baseline volume adjusted lung density

<sup>4</sup> For non-nested models, the p value given for each comparison is the p value for partial likelihood ratio test with the null hypothesis that the model fits are equally close to the true model. For example, for baseline spirometry vs. baseline imaging comparison, the first p value given is for the alternative hypothesis that the baseline spirometry model fits better than the baseline imaging model, and the second p value given is for the alternative hypothesis that the baseline imaging model fits better than the baseline spirometry model. (24, 25)

<sup>5</sup> For the nested models, the p value given is for the likelihood ratio test with the null hypothesis that both models fit equally well and the alternative hypothesis that the second (larger) model fits better than the first (smaller) model. (24, 25)

<sup>6</sup> Abbreviations: Akaike information criterion (AIC). (26)

<sup>7</sup> Results shown are in those with and without emphysema at baseline (all ever smokers)

**Table 4B: Comparison of Model Performance in the ECLIPSE Cohort**

| Comparison                                                     | Akaike Information Criterion |                     | p                                              |                              |
|----------------------------------------------------------------|------------------------------|---------------------|------------------------------------------------|------------------------------|
|                                                                | AIC of First Model           | AIC of Second Model | First Model vs. Second Model (non-nested only) | Second Model vs. First Model |
| <b>Baseline vs. Baseline</b>                                   |                              |                     |                                                |                              |
| Baseline Spirometry vs. Baseline Imaging                       | 3002.63                      | 3023.15             | 0.11                                           | 0.89                         |
| Baseline Spirometry vs. Baseline Spirometry + Baseline Imaging | 3002.63                      | 2986.94             | N/A                                            | < 0.001                      |
| Baseline Imaging vs. Baseline Spirometry + Baseline Imaging    | 3023.15                      | 2986.94             | N/A                                            | < 0.001                      |



| Comparison                                                                                | Akaike Information Criterion |                     | p                                              |                              |
|-------------------------------------------------------------------------------------------|------------------------------|---------------------|------------------------------------------------|------------------------------|
|                                                                                           | AIC of First Model           | AIC of Second Model | First Model vs. Second Model (non-nested only) | Second Model vs. First Model |
| <b>Longitudinal vs. Longitudinal</b>                                                      |                              |                     |                                                |                              |
| Longitudinal Spirometry vs. Longitudinal Imaging                                          | 2985.00                      | 3005.98             | 0.13                                           | 0.87                         |
| Longitudinal Spirometry vs. Longitudinal Spirometry + Longitudinal Imaging                | 2985.00                      | 2969.20             | N/A                                            | < 0.001                      |
| Longitudinal Imaging vs. Longitudinal Spirometry + Longitudinal Imaging                   | 3005.98                      | 2969.20             | N/A                                            | < 0.001                      |
| <b>Baseline vs. Longitudinal</b>                                                          |                              |                     |                                                |                              |
| Baseline Spirometry vs. Longitudinal Spirometry                                           | 3002.63                      | 2985.00             | N/A                                            | < 0.001                      |
| Baseline Imaging vs. Longitudinal Imaging                                                 | 3023.15                      | 3005.98             | N/A                                            | < 0.001                      |
| Baseline Spirometry + Baseline Imaging vs. Longitudinal Spirometry + Longitudinal Imaging | 2986.94                      | 2969.20             | N/A                                            | < 0.001                      |

<sup>1</sup> All models adjusted for: a) Race and gender; b) Baseline age, smoking status and pack years. All models with longitudinal data also adjusted for change in smoking status, rate of change in forced expiratory volume in one second and rate of change in six minute walk distance.

<sup>2</sup> Baseline models include baseline forced expiratory volume in one second and/or baseline volume adjusted lung density

<sup>3</sup> Longitudinal models include baseline and rate of change in forced expiratory volume in one second and/or baseline volume adjusted lung density

<sup>4</sup> For non-nested models, the p value given for each comparison is the p value for partial likelihood ratio test with the null hypothesis that the model fits are equally close to the true model. For example, for baseline spirometry vs. baseline imaging comparison, the first p value given is for the alternative hypothesis that the baseline spirometry model fits better than the baseline imaging model, and the second p value given is for the alternative hypothesis that the baseline imaging model fits better than the baseline spirometry model. (24, 25)

<sup>5</sup> For the nested models, the p value given is for the likelihood ratio test with the null hypothesis that both models fit equally well and the alternative hypothesis that the second (larger) model fits better than the first (smaller) model. (24, 25)

<sup>6</sup> Abbreviations: Akaike information criterion (AIC). (26)

<sup>7</sup> Results shown are in those with and without emphysema at baseline (all ever smokers)

## Appendix E2

### COPGene Site Institutional Review Boards

| Clinical Center                                           | Institution Title                                                                                                      | Protocol Number      |
|-----------------------------------------------------------|------------------------------------------------------------------------------------------------------------------------|----------------------|
| National Jewish Health                                    | National Jewish IRB                                                                                                    | HS-1883a             |
| Brigham and Women's Hospital                              | Partners Human Research Committee                                                                                      | 2007-P-000554/2; BWH |
| Baylor College of Medicine                                | Institutional Review Board for Baylor                                                                                  | H-22209              |
|                                                           | College of Medicine and Affiliated Hospitals                                                                           |                      |
| Michael E. DeBakey VAMC                                   | Institutional Review Board for Baylor College of Medicine and Affiliated Hospitals                                     | H-22202              |
| Columbia University Medical Center                        | Columbia University Medical Center IRB                                                                                 | IRB-AAAC9324         |
| Duke University Medical Center                            | The Duke University Health System Institutional Review Board for Clinical Investigations (DUHS IRB)                    | Pro00004464          |
| Johns Hopkins University                                  | Johns Hopkins Medicine Institutional Review Boards (JHM IRB)                                                           | NA_00011524          |
| Los Angeles Biomedical Research Institute                 | The John F. Wolf, MD Human Subjects Committee of Harbor-UCLA Medical Center                                            | 12756-01             |
| Morehouse School of Medicine                              | Morehouse School of Medicine Institutional Review Board                                                                | 07-1029              |
| Temple University                                         | Temple University Office for Human Subjects Protections Institutional Review Board                                     | 11369                |
| University of Alabama at Birmingham                       | The University of Alabama at Birmingham Institutional Review Board for Human Use                                       | FO70712014           |
| University of California, San Diego                       | University of California, San Diego Human Research Protections Program                                                 | 070876               |
| University of Iowa                                        | The University of Iowa Human Subjects Office                                                                           | 200710717            |
| Ann Arbor VA                                              | VA Ann Arbor Health care System IRB                                                                                    | PCC 2008-110732      |
| University of Minnesota                                   | University of Minnesota Research Subjects' Protection Programs (RSPP)                                                  | 0801M24949           |
| University of Pittsburgh                                  | University of Pittsburgh Institutional Review Board                                                                    | PRO07120059          |
| University of Texas Health Sciences Center at San Antonio | UT Health Science Center San Antonio Institutional Review Board                                                        | HSC20070644H         |
| Health Partners Research Foundation                       | Health Partners Research Foundation Institutional Review Board                                                         | 07-127               |
| University of Michigan                                    | Medical School Institutional Review Board (IRBMED)                                                                     | HUM00014973          |
| Minneapolis VA Medical Center                             | Minneapolis VAMC IRB                                                                                                   | 4128-A               |
| Fallon Clinic                                             | Institutional Review Board/Research Review Committee Saint Vincent Hospital-Fallon Clinic-Fallon Community Health Plan | 1143                 |

## Appendix E3

### ECLIPSE Site Institutional Review Boards

| Inv/Site No.  | Institution & Address                                                                                             | IEC/IRB Committee                                                                                                                                      |
|---------------|-------------------------------------------------------------------------------------------------------------------|--------------------------------------------------------------------------------------------------------------------------------------------------------|
| 027904/023622 | Asthma Centre Ivan Vazov Street Nr 31 PO Box 1018 Pleven, 5800 Bulgaria                                           | Ethics Committee for Multicentre Trials 8, Damyan Gruev str., Sofia 1303 Bulgaria                                                                      |
| 076209/023623 | Military Medical Academy Georgi Sofiiski 3 str Sofia 1606 Bulgaria                                                | Ethics Committee for Multicentre Trials 8, Damyan Gruev str., Sofia 1303 Bulgaria                                                                      |
| 006269/023794 | Montreal Chest Institute 3650 St-Urbain, Room K307 Montreal, QC H2x 2P4 Canada                                    | McGill University Health Center Research Ethics Board 3650 St Urbain Montreal, QC H2x 2P4                                                              |
| 006610/023668 | The Lung Center 2775 Laurel St., seventh Floor Vancouver, BC V5Z 1M9 Canada                                       | The University of British Columbia Office of Research Services Clinical Research Ethics Board Room210, 828 West 10th Ave Vancouver, BC V5Z 1 L8 Canada |
| 004970/023483 | Queen Elizabeth II Health Sciences Centre Halifax Infirmary 1796 Summer St., Room 5452 Halifax, NS B3H 3A7 Canada | Capital Health Research Ethics Board Centre for Clinical Research Building 118-5790 University Avenue Halifax, NS B3H 1 V7 Canada                      |

|                |                                                                                                                                        |                                                                                                                                                                    |
|----------------|----------------------------------------------------------------------------------------------------------------------------------------|--------------------------------------------------------------------------------------------------------------------------------------------------------------------|
| 029347/023796  | McMaster University, Health Sciences Center 1200 Main St. West, Room 3U25 Hamilton, ON L8N 3Z5 Canada                                  | Hamilton Health Sciences/Faculty of Health Sciences Research Ethics Board 293 Wellington St N, Suite 102 Hamilton, Ontario L8 L 8E7 Canada                         |
| 035031/023795  | Pacific Lung Health Center 1081 Burrard Street 8B Providence Wing Vancouver, BC V6Z 1Y6 Canada                                         | Office of Research Services (ORS) Providence Health Care Research Institute Room 1125, 11th Floor 1190 Hornby Street c/o 1081 Burrard Street Vancouver, BC V6Z 1Y6 |
| 006193/023547  | Hopital Laval, Recherche Clinic Centre de Pneumologie 2725 Chemin Sainte Foy Pavillion U, Locale U 1751 Sainte Foy, QC G1 V 4G5 Canada | Comité d'éthique de la recherche Institut Universitaire de Cardiologie et de Pneumologie de Québec (IUCPQ) 2725, chemin Ste-Foy Quebec, Qc Canada G1 V 4G5         |
| 004395/02409 4 | Kingston General Hospital Richardson House 102 Stuart Street Kingston, ON K7 L 2 V6 Canada                                             | Queens University Office of Research Services Fleming Hall, Jemmett Wing, Room 301 Queens University Kingston, ON, Canada                                          |
| 000309/024204  | SPLiN s.r.o. Oddeleni TRN Cimicka 37/446 Praha 8 18200 Czech Republic                                                                  | Multicentric Ethics Committee Fakultni nemocnice v Motole V Uvalu 84 Prague 5 ZIP: 150 06 Czech Republic                                                           |
| 000683/023960  | H:S Hvidovre Hospital Hjerte-Lungemedicinsk afdeling Kettegaard Alle 30 Opgang 1 Hvidovre 2650 Denmark                                 | Den videnskabetiske komité for region hovedstaden Regionsgaarden Kongensvænge 2 3400 Hillerød                                                                      |
| 001687/024403  | Astmacentrum Hornerheide Hornerheide 1 Horn 6085 NM Netherlands                                                                        | METC Zuidwest-Holland M.H.H.A. Kirkels-Breukers P.O Box 5011 2600 GA Delft The Netherlands                                                                         |

## Appendix E4

### COPDGene Publications

1. Pillai SG, Ge D, Zhu G, Kong X, Shianna KV, Need AC, Feng S, Hersh CP, Bakke P, Gulsvik A, Ruppert A, Lodrup Carlsen KC, Roses A, Anderson W, Rennard SI, Lomas DA, Silverman EK, Goldstein DB, ICGN Investigators. A genome-wide association study in chronic obstructive pulmonary disease (COPD): identification of two major susceptibility loci. *PLoS Genet* 2009 Mar; 5:e1000421. PMID: 19300482 PMCID: 2650282  
<http://www.ncbi.nlm.nih.gov/pmc/articles/PMC2650282>
2. Ross JC, Estepar RSJ, Diaz A, Westin CF, Kikinis Ron, Silverman EK, Washko GR. Lung extraction, lobe segmentation and hierarchical region assessment for quantitative analysis on high resolution computed tomography images. *Med Image Comput Comput Assist Interv* 2009; 12:690-8. PMID: 20426172 PMCID: 3061233  
<http://www.ncbi.nlm.nih.gov/pmc/articles/PMC3061233>
3. Washko GR, Dransfield MT, San Jose Estepar R, Diaz A, Matsuoka S, Yamashiro T, Hatabu H, Silverman EK, Bailey WC, Reilly JJ. Airway wall attenuation: A biomarker of airway disease in subjects with COPD. *J Appl Physiol* 2009; 107:185-191. PMID: 19407254 PMCID: 2711787  
<http://www.ncbi.nlm.nih.gov/pmc/articles/PMC2711787>
4. Oberley-Deegan RE, Regan EA, Kinnula VL, Crapo JD. Extracellular superoxide dismutase and risk of COPD. *COPD* 2009 Aug; 6:307-12. PMID: 19811392 PMCID: 4075061  
<http://www.ncbi.nlm.nih.gov/pmc/articles/PMC4075061>
5. Kindlmann GL, San Jose Estepar R, Smith SM, Westin CF. Sampling and visualizing creases with scale-space particles. *IEEE Trans Vis Comput Graph* 2009 Nov-Dec; 15:1415-24. PMID: 19834216 PMCID: 2891996  
<http://www.ncbi.nlm.nih.gov/pmc/articles/PMC2891996>

6. Washko GR, Lynch DA, Matsuoka S, Ross JC, Umeoka S, Diaz A, Sciruba FC, Hunninghake GM, San José Estépar R, Silverman EK, Rosas IO, Hatabu H. Identification of early interstitial lung disease in smokers from the COPDGene study. *Acad Radiol* 2010; 17:48-53. PMID: 19781963 PMCID: 2790552  
<http://www.ncbi.nlm.nih.gov/pmc/articles/PMC2790552>
7. Regan EA, Hokanson JE, Murphy JR, Make BJ, Lynch DA, Beaty TH, Curran-Everett D, Silverman EK, Crapo JD. Genetic epidemiology of COPD (COPDGene) study design. *COPD* 2010; 7:32-43. PMID: 20214461 PMCID: 2924193  
<http://www.ncbi.nlm.nih.gov/pmc/articles/PMC2924193>
8. Cho MH, Boutaoui N, Klanderman BJ, Sylvia JS, Ziniti JP, Hersh CP, DeMeo DL, Hunninghake GM, Litonjua AA, Sparrow D, Lange C, Won S, Murphy JR, Beaty TH, Regan EA, Make BJ, Hokanson JE, Crapo JD, Kong X, Anderson WH, Tal- Singer R, Lomas DA, Bakke P, Gulsvik A, Pillai SG, Silverman EK. Variants in FAM13A are associated with chronic obstructive pulmonary disease. *Nat Genet* 2010; 42:200-202. PMID: 20173748 PMCID: 2828499  
<http://www.ncbi.nlm.nih.gov/pmc/articles/PMC2828499>
9. Crapo JD. Preclinical vascular disease identifies smokers at risk for COPD. *Proc Natl Acad Sci USA* 2010 May; 107:8503-4. PMID: 20442330 PMCID: 2889364  
<http://www.ncbi.nlm.nih.gov/pmc/articles/PMC2889364>
10. Washko GR. Diagnostic imaging in COPD. *Semin Respir Crit Care Med.* 2010 Jun;31(3):276-85. PMID: 20496297 PMCID: 4334134  
<http://www.ncbi.nlm.nih.gov/pmc/articles/PMC4334134>
11. Ross JC, San José Estépar R, Kindlmann G, Díaz A, Westin CF, Silverman EK, Washko GR. Automatic lung lobe segmentation using particles, thin plate splines, and maximum a posteriori estimation. *Med Image Comput Assist Interv* 2010; 13(Pt3):163-171. PMID: 20879396 PMCID: 3049444  
<http://www.ncbi.nlm.nih.gov/pmc/articles/PMC3049444>
12. Yao H, Arunachalam G, Hwang JW, Chung S, Sundar IK, Kinnula VL, Crapo JD, Rahman I. Extracellular superoxide dismutase protects against pulmonary emphysema by attenuating oxidative fragmentation of ECM. *Proc Natl Acad Sci USA* 2010 Aug; 107:15571-6. PMID: 20713693 PMCID: 2932580  
<http://www.ncbi.nlm.nih.gov/pmc/articles/PMC2932580>
13. Murphy A, Won S, Rogers A, Chu HW, Raby BA, Lange C. On the genome-wide analysis of copy number variants in family-based designs: methods for combining family-based and population-based information for testing dichotomous or quantitative traits, or completely ascertained samples. *Genet Epidemiol* 2010 Sep; 34:582-90. PMID: 20718041 PMCID: 3349936  
<http://www.ncbi.nlm.nih.gov/pmc/articles/PMC3349936>
14. Diaz AA, Valim C, Yamashiro T, Estépar RS, Ross JC, Matsuoka S, Bartholmai B, Hatabu H, Silverman EK, Washko GR. Airway count and emphysema assessed by chest CT imaging predicts clinical outcome in smokers. *Chest* 2010; 138:880-887. PMID: 20558554 PMCID: 2951760  
<http://www.ncbi.nlm.nih.gov/pmc/articles/PMC2951760>

15. Castaldi PJ, Demeo DL, Hersh CP, Lomas DA, Soerheim IC, Gulsvik A, Bakke P, Rennard S, Pare P, Vestobo J, AATGM Investigators, ICGN Investigators, Silverman EK. The Impact of Nonlinear Smoking Effects on the Identification of Gene-by-Smoking Interactions in COPD Genetics Studies. *Thorax*. 2011 Oct;66(10):903-909. PMID: 21163806 PMCID: 3312798  
<http://www.ncbi.nlm.nih.gov/pmc/articles/PMC3312798>
16. Kim WJ, Hoffman E, Reilly J, Hersh CP, Demeo D, Washko GR, Silverman EK. Association of COPD candidate genes with computed tomography emphysema and airway phenotypes in severe COPD. *Eur Respir J* 2011 Jan; 37:39-43. PMID: 20525719 PMCID: 3074301  
<http://www.ncbi.nlm.nih.gov/pmc/articles/PMC3074301>
17. Matsuoka S, Yamashiro T, Diaz A, San Jose Estepar R, Ross JC, Silverman EK, Kobayashi Y, Dransfield MT, Bartholmai BJ, Hatabu H, Washko GR. The relationship between small pulmonary vascular alteration and aortic atherosclerosis in chronic obstructive pulmonary disease: quantitative CT analysis. *Acad Radiol* 2011 Jan; 18:40-6. PMID: 20947389 PMCID: 3006041  
<http://www.ncbi.nlm.nih.gov/pmc/articles/PMC3006041>
18. Kim DK, Hersh CP, Washko GR, Hokanson JE, Lynch DA, Newell JD, Murphy JR, Crapo JD, Silverman EK; COPD Gene Investigators. Epidemiology, radiology, and genetics of nicotine dependence in COPD. *Respir Res* 2011; 12:9. PMID: 21232152 PMCID: 3033825  
<http://www.ncbi.nlm.nih.gov/pmc/articles/PMC3033825>
19. Budoff MJ, Nasir K, Kinney GL, Hokanson JE, Barr RG, Steiner R, Nath H, Lopez-Garcia C, Black-Shinn J, Casaburi R. Coronary artery and thoracic calcium on noncontrast thoracic CT scans: Comparison of ungated and gated examinations in patients from the COPDGene cohort. *J Cardiovasc Comput Tomogr* 2011; 5:113-118. PMID: 21167806 PMCID: 3075464  
<http://www.ncbi.nlm.nih.gov/pmc/articles/PMC3075464>
20. Washko GR, Hunninghake GM, Fernandez IE, Nishino M, Okajima Y, Yamashiro T, Ross JC, Estepar RS, Lynch DA, Brehm JM, Andriole KP, Diaz AA, Khorasani R, D'Aco K, Sciruba FC, Silverman EK, Hatabu H, Rosas IO; COPDGene Investigators. Lung volumes and emphysema in smokers with interstitial lung abnormalities. *N Engl J Med* 2011; 364:897-906. PMID: 21388308 PMCID: 3074462  
<http://www.ncbi.nlm.nih.gov/pmc/articles/PMC3074462>
21. Yip WK, Lange C. Quantitative trait prediction based on genetic marker-array data: A simulation study. *Bioinformatics* 2011; 27:745-748. PMID: 21285022 PMCID: 3105484  
<http://www.ncbi.nlm.nih.gov/pmc/articles/PMC3105484>
22. Lipman PJ, Cho MH, Bakke P, Gulsvik A, Kong X, Lomas DA, Anderson W, Silverman EK, Lange C. On the follow-up of genome-wide association studies: an overall test for the most promising S.N.P.s. *Genet Epidemiol* 2011; 35:303-309. PMID: 21374717 PMCID: 4096304  
<http://www.ncbi.nlm.nih.gov/pmc/articles/PMC4096304>
23. Wan ES, Hokanson JE, Murphy JR, Regan EA, Make BJ, Lynch DA, Crapo JD, Silverman EK and the COPDGene Investigators. Clinical and radiographic predictors of

- GOLD-unclassified smokers in COPDGene. *Am J Respir Crit Care Med* 2011; 184:57-63. PMID: 21493737 PMCID: 3172890  
<http://www.ncbi.nlm.nih.gov/pmc/articles/PMC3172890>
24. Young RP, Hopkins RJ, Gamble GD, Etzel C, El-Zein R, Crapo JD. Genetic evidence linking lung cancer and COPD: a new perspective. *The Application of Clinical Genetics* 2011; 4:99-111. PMID: 23776371 PMCID: 3681182  
<http://www.ncbi.nlm.nih.gov/pmc/articles/PMC3681182>
25. Kim YI, Schroeder J, Lynch DA, Newell J, Make BJ, Friedlander A, San Jose Estépar R, Hanania NA, Washko GR, Murphy JR, Wilson C, Hokanson JE, Zach J, Butterfield K, Bowler RP, COPDGene Investigators. Gender differences of airway dimensions in anatomically matched sites on CT in smokers. *COPD* 2011; 8:285-292. PMID: 21756032 PMCID: 3703311  
<http://www.ncbi.nlm.nih.gov/pmc/articles/PMC3703311>
26. Wan ES, Cho MH, Boutaoui N, Klanderman BJ, Sylvia JS, Ziniti JP, Won S, Lange C, Pillai SG, Anderson WH, Kong X, Lomas DA, Bakke PS, Gulsvik A, Regan EA, Murphy JR, Make BJ, Crapo JD, Wouters EF, Celli BR, Silverman EK, DeMeo DL; Evaluation of Chronic Obstructive Pulmonary Disease Longitudinally to Identify Predictive Surrogate End-Points (ECLIPSE); Norway-Bergen cohort; National Emphysema Treatment Trial; COPD Gene investigators. Genome-wide association analysis of body mass in chronic obstructive pulmonary disease. *Am J Respir Cell Mol Biol* 2011; 45:304-310. PMID: 21037115 PMCID: 3266061  
<http://www.ncbi.nlm.nih.gov/pmc/articles/PMC3266061>
27. Hersh CP, Hokanson JE, Lynch DA, Washko GR, Make BJ, Crapo JD, Silverman EK, COPDGene Investigators. Family history is a risk factor for COPD. *Chest* 2011; 140:343-350. PMID: 21310839 PMCID: 3198493  
<http://www.ncbi.nlm.nih.gov/pmc/articles/PMC3198493>
28. Kim DK, Jacobson FL, Washko GR, Casaburi R, Make BJ, Crapo JD, Silverman EK, Hersh CP. Clinical and radiographic correlates of hypoxemia and oxygen therapy in the COPDGene study. *Respir Med* 2011; 105:1211-1221. PMID: 21396809 PMCID: 3116986  
<http://www.ncbi.nlm.nih.gov/pmc/articles/PMC3116986>
29. Foreman MG, Zhang L, Murphy J, Hansel NN, Make B, Hokanson JE, Washko G, Regan EA, Crapo JD, Silverman EK, DeMeo DL; the COPDGene Investigators. Early-onset chronic obstructive pulmonary disease is associated with female sex, maternal factors, and African American race in the COPDGene study. *Am J Respir Crit Care Med* 2011; 184:414-420. PMID: 21562134 PMCID: 3175544  
<http://www.ncbi.nlm.nih.gov/pmc/articles/PMC3175544>
30. Kim V, Han MK, Vance GB, Make BJ, Newell JD, Hokanson JE, Hersh CP, Stinson D, Silverman EK, Criner GJ, COPDGene Investigators. The chronic bronchitic phenotype of COPD: an analysis of the COPDGene study. *Chest* 2011; 140:626-633. PMID: 21474571 PMCID: 3168856  
<http://www.ncbi.nlm.nih.gov/pmc/articles/PMC3168856>
31. Qiu W, Cho MH, Riley JH, Anderson WH, Singh D, Bakke P, Gulsvik A, Litonjua AA, Lomas DA, Crapo JD, Beaty TH, Celli BR, Rennard S, Tal-Singer R, Fox SM, Silverman



- EK, Hersh CP; and the ECLIPSE Investigators. Genetics of sputum gene expression in chronic obstructive pulmonary disease. *PLoS One* 2011; 6(9):e24395. PMID: 21949713 PMCID: 3174957  
<http://www.ncbi.nlm.nih.gov/pmc/articles/PMC3174957>
32. Hardin M, Silverman EK, Barr RG, Hansel NN, Schroeder JD, Make BJ, Crapo JD, Hersh CP; the COPDGene Investigators. The clinical features of the overlap between COPD and asthma. *Respir Res* 2011; 12:127. PMID: 21951550 PMCID: 3204243  
<http://www.ncbi.nlm.nih.gov/pmc/articles/PMC3204243>
33. Siedlinski M, Cho MH, Bakke P, Gulsvik A, Lomas DA, Anderson W, Kong X, Rennard SI, Beaty TH, Hokanson JE, Crapo JD, Silverman EK; COPDGene Investigators; ECLIPSE Investigators. Genome-wide association study of smoking behaviors in patients with COPD. *Thorax* 2011; 66:894-902. PMID: 21685187 PMCID: 3302576  
<http://www.ncbi.nlm.nih.gov/pmc/articles/PMC3302576>
34. Han MK, Kazerooni EA, Lynch DA, Liu LX, Murray S, Curtis JL, Criner GJ, Kim V, Bowler RP, Hanania NA, Anzueto AR, Make BJ, Hokanson JE, Crapo JD, Silverman EK, Martinez FJ, Washko GR, COPDGene Investigators. Chronic obstructive pulmonary disease exacerbations in the COPDGene Study: associated radiologic phenotypes. *Radiology* 2011; 261:274-282. PMID: 21788524 PMCID: 3184233  
<http://www.ncbi.nlm.nih.gov/pmc/articles/PMC3184233>
35. Han MK, Curran-Everett D, Dransfield MT, Criner GJ, Zhang L, Murphy JR, Hansel NN, DeMeo DL, Hanania NA, Regan EA, Make BJ, Martinez FJ, Westney GE, Foreman MG; COPDGene Investigators. Racial differences in quality of life with COPD. *Chest* 2011; 140:1169-1176. PMID: 21636665 PMCID: 3205846  
<http://www.ncbi.nlm.nih.gov/pmc/articles/PMC3205846>
36. Castaldi PJ, Cho MH, Litonjua AA, Bakke P, Gulsvik A, Lomas DA, Anderson W, Beaty TH, Hokanson JE, Crapo JD, Laird N, Silverman EK; COPDGene and ECLIPSE Investigators. The association of genome-wide significant spirometric loci with chronic obstructive pulmonary disease susceptibility. *Am J Respir Cell Mol Biol* 2011; 45:1147-1153. PMID: 21659657 PMCID: 3262664  
<http://www.ncbi.nlm.nih.gov/pmc/articles/PMC3262664>
37. Risholm P, Ross J, Washko GR, Wells WM. Probabilistic elastography: estimating lung elasticity. *Inf Process Med Imaging* 2011; 22:699-710. PMID: 21761697 PMCID: 3249413  
<http://www.ncbi.nlm.nih.gov/pmc/articles/PMC3249413>
38. Swift I, Satti A, Kim V, Make BJ, Newell J, Steiner RM, Wilson C, Murphy JR, Silverman EK, Criner GJ; COPDGene Investigators. Demographic, physiologic and radiographic characteristics of COPD patients taking chronic systemic corticosteroids. *COPD* 2012; 9:29-35. PMID: 22292596 PMCID: 3764986  
<http://www.ncbi.nlm.nih.gov/pmc/articles/PMC3764986>
39. Cho MH, Castaldi PJ, Wan ES, Siedlinski M, Hersh CP, Demeo DL, Himes BE, Sylvia JS, Klanderman BJ, Ziniti JP, Lange C, Litonjua AA, Sparrow D, Regan EA, Make BJ, Hokanson JE, Murray T, Hetmanski JB, Pillai SG, Kong X, Anderson WH, Tal-Singer R, Lomas DA, Coxson HO, Edwards LD, MacNee W, Vestbo J, Yates JC, Agusti A, Calverley PM, Celli B, Crim C, Rennard S, Wouters E, Bakke P, Gulsvik A, Crapo JD,

Beatty TH, Silverman EK; on behalf of the ICGN, ECLIPSE, and COPDGene Investigators. A genome-wide association study of COPD identifies a susceptibility locus on chromosome 19q13. *Hum Mol Genet* 2012; 21:947-957. PMID: 22080838 PMCID: 3298111  
<http://www.ncbi.nlm.nih.gov/pmc/articles/PMC3298111>

40. Diaz AA, Come CE, Ross JC, San José Estépar R, Han MK, Loring SH, Silverman EK, Washko GR; COPDGene Investigators. Association between airway caliber changes with lung inflation and emphysema assessed by volumetric CT scan in subjects with COPD. *Chest* 2012; 141:736-744. PMID: 22080838 PMCID: 3296457  
<http://www.ncbi.nlm.nih.gov/pmc/articles/PMC3296457>
41. Xu JF, Washko GR, Nakahira K, Hatabu H, Patel AS, Fernandez IE, Nishino M, Okajima Y, Yamashiro T, Ross JC, San Jose Estépar R, Diaz AA, Li HP, Qu JM, Himes BE, Come CE, D'Aco K, Martinez FJ, Han MK, Lynch DA, Crapo JD, Morse D, Ryter SW, Silverman EK, Rosas IO, Choi AM, Hunninghake GM, the COPDGene Investigators. Statins and pulmonary fibrosis: the potential role of NLRP3 inflammasome activation. *Am J Respir Crit Care Med* 2012; 185:547-556. PMID: 22246178 PMCID: 3297101  
<http://www.ncbi.nlm.nih.gov/pmc/articles/PMC3297101>
42. Rambod M, Porszasz J, Make BJ, Crapo JD, Casaburi R; the COPDGene Investigators. Six-minute walk distance predictors, including CT scan measures, in the COPDGene Cohort. *Chest* 2012; 141:867-875. PMID: 21960696 PMCID: 3318949  
<http://www.ncbi.nlm.nih.gov/pmc/articles/PMC3318949>
43. COPDGene CT Workshop Group, Barr RG, Berkowitz EA, Bigazzi F, Bode F, Bon J, Bowler RP, Chiles C, Crapo JD, Criner GJ, Curtis JL, Dass C, Dirksen A, Dransfield MT, Eudala G, Eriksson L, Friedlander A, Galperin-Aizenberg M, Gefter WB, Gierada DS, Grenier PA, Goldin J, Han MK, Hanania NA, Hansel NN, Jacobson FL, Kauczor HU, Kinnula VL, Lipson DA, Lynch DA, MacNee W, Make BJ, Marmay AJ, Mann H, Marchetti N, Mascalchi M, McLennan G, Murphy JR, Naidich D, Nath H, Newell JD Jr, Pistolesi M, Regan EA, Reilly JJ, Sandhaus R, Schroeder JD, Sciruba F, Shaker S, Sharafkhaneh A, Silverman EK, Steiner RM, Strange C, Sverzellati N, Tashjian JH, Beek EJ, Washington L, Washko GR, Westney G, Wood SA, Woodruff PG. A combined pulmonary-radiology workshop for visual evaluation of COPD: study design, chest CT findings and concordance with quantitative evaluation. *COPD* 2012; 9:151-159. PMID: 22429093 PMCID: 3752926  
<http://www.ncbi.nlm.nih.gov/pmc/articles/PMC3752926>
44. Doyle TJ, Washko GR, Fernandez IE, Nishino M, Okajima Y, Yamashiro T, Divo MJ, Celli BR, Sciruba FC, Silverman EK, Hatabu H, Rosas IO, Hunninghake GM, COPDGene Investigators. Interstitial lung abnormalities and reduced exercise capacity. *Am J Respir Crit Care Med* 2012; 185:756-762. PMID: 22268134 PMCID: 3326424  
<http://www.ncbi.nlm.nih.gov/pmc/articles/PMC3326424>
45. Christoforou, Andrea; Dondrup, Michael; Mattingsdal, Morten; Mattheisen, Manuel; Giddaluru, Sudheer; Nothen, Markus M; Rietschel, Marcella; Cichon, Sven; Djurovic, Srdjan; Andreassen, Ole A; Jonassen, Inge; Steen, Vidar M; Puntervoll, Pal; Le Hellard,



- Stephanie. Linkage-disequilibrium-based binning affects the interpretation of GWASs. *Am J Hum Genet* 2012; 90:727-33 PMID: 21960696 PMCID: 3322240  
<http://www.ncbi.nlm.nih.gov/pmc/articles/PMC3322240>
46. Martinez CH, Chen YH, Westgate PM, Liu LX, Murray S, Curtis JL, Make BJ, Kazerooni EA, Lynch DA, Marchetti N, Washko GR, Martinez FJ, Han MK; COPDGene Investigators. Relationship between quantitative CT metrics and health status and BODE in chronic obstructive pulmonary disease. *Thorax* 2012; 67:399-406. PMID: 22514236 PMCID: 3719874  
<http://www.ncbi.nlm.nih.gov/pmc/articles/PMC3719874>
47. Mendoza CS, Washko GR, Ross JC, Díaz AA, Lynch DA, Crapo JD, Silverman EK, Acha B, Serrano C, Estepar RS. Emphysema quantification in a multi-scanner HRCT cohort using local intensity distributions. *Proc IEEE Int Symp Biomed Imaging*, 2012: 474-477 PMID: 23743800 PMCID: 3670097  
<http://www.ncbi.nlm.nih.gov/pmc/articles/PMC3670097>
48. San Jose Estépar R, Ross JC, Kindlmann GL, Díaz AA, Okajima Y, Kikinis R, Westin CR, Silverman EK, Washko GR. Automatic airway analysis for genome-wide association studies in COPD. In: 2012 9th IEEE International Symposium on Biomedical Imaging. Institute of Electrical and Electronics Engineers. *Proc IEEE Int Symp Biomed Imaging*. 2012; pp 1467–1470. PMID: 23744052 PMCID: 3670103  
<http://www.ncbi.nlm.nih.gov/pmc/articles/PMC3670103>
49. San Jose Estépar R, Ross JC, Krissian K, Schultz T, Washko GR, Kindlmann G. Computational vascular morphometry for the assessment of pulmonary vascular disease based on scale-space particles. In: 2012 9th IEEE International Symposium on Biomedical Imaging. Institute of Electrical and Electronics Engineers. *Proc IEEE Int Symp Biomed Imaging*. 2012; pp 1479–1482. PMID: 23743962 PMCID: 3670102  
<http://www.ncbi.nlm.nih.gov/pmc/articles/PMC3670102>
50. Qiao D, Yip WK, Lange C. Handling the data management needs of high-throughput sequencing data: SpeedGene, a compression algorithm for the efficient storage of genetic data. *BMC Bioinformatics* 2012 May 16, 13:100. PMID: 22591016 PMCID: 3434015  
<http://www.ncbi.nlm.nih.gov/pmc/articles/PMC3434015>
51. Adhikari K, AlChawa T, Ludwig K, Mangold E, Laird N, Lange C. Is it rare or common? *Genet Epidemiol* 2012; 36:419-429. PMID: 22549767 PMCID: 3641852  
<http://www.ncbi.nlm.nih.gov/pmc/articles/PMC3641852>
52. Aminuddin F, Akhabor L, Stefanowicz D, Paré PD, Connett JE, Anthonisen NR, Fahy JV, Seibold MA, Burchard EG, Eng C, Gulsvik A, Bakke P, Cho MH, Litonjua A, Lomas DA, Anderson WH, Beaty TH, Crapo JD, Silverman EK, Sandford AJ. Genetic association between human chitinases and lung function in COPD. *Hum Genet* 2012; 131:1105-14. PMID: 22200767 PMCID: 3771523  
<http://www.ncbi.nlm.nih.gov/pmc/articles/PMC3771523>
53. Stewart JI, Moyle S, Criner GJ, Wilson C, Tanner R, Bowler RP, Crapo JD, Zeldin RK, Make BJ, Regan EA, for the COPDGene Investigators. Automated telecommunication to obtain longitudinal follow-up in a multicenter cross-sectional COPD study. *COPD* 2012; 9:466-72. PMID: 22676387 PMCID: 3698488  
<http://www.ncbi.nlm.nih.gov/pmc/articles/PMC3698488>

54. Kurugol S, San Jose Estepar R, Ross J, Washko GR. Aorta segmentation with a 3D level set approach and quantification of aortic calcifications in non-contrast chest CT. *Conf Proc IEEE Eng Med Biol Soc* 2012; 2012:2343-6. PMID: 23366394 PMCID: 3671590 <http://www.ncbi.nlm.nih.gov/pmc/articles/PMC3671590>
55. Sieren JP, Newell JD, Judy PF, Lynch DA, Chan KS, Guo J, Hoffman EA. Reference standard and statistical model for intersite and temporal comparisons of CT attenuation in a multicenter quantitative lung study. *Med Phys* 2012; 39:5757-5767. PMID: 22957640 PMCID: 3448623 <http://www.ncbi.nlm.nih.gov/pmc/articles/PMC3448623>
56. Wells JM, Washko GR, Han MK, Abbas N, Nath H, Mamary AJ, Regan E, Bailey WC, Martinez FJ, Westfall E, Beaty TH, Curran-Everett D, Curtis JL, Hokanson JE, Lynch DA, Make BJ, Crapo JD, Silverman EK, Bowler RP, Dransfield MT; COPDGene Investigators; ECLIPSE Study Investigators. Pulmonary arterial enlargement and acute exacerbations of COPD. *N Engl J Med* 2012; 367:913-921. PMID: 22938715 PMCID: 3690810 <http://www.ncbi.nlm.nih.gov/pmc/articles/PMC3690810>
57. Wilk JB, Shrine NR, Loehr LR, Zhao JH, Manichaikul A, Lopez LM, Smith AV, Heckbert SR, Smolonska J, Tang W, Loth DW, Curjuric I, Hui J, Cho MH, Latourelle JC, Henry AP, Aldrich M, Bakke P, Beaty TH, Bentley AR, Borecki IB, Brusselle GG, Burkart KM, Chen TH, Couper D, Crapo JD, Davies G, Dupuis J, Franceschini N, Gulsvik A, Hancock DB, Harris TB, Hofman A, Imboden M, James AL, Khaw KT, Lahousse L, Launer LJ, Litonjua A, Liu Y, Lohman KK, Lomas DA, Lumley T, Marcianti KD, McArdle WL, Meibohm B, Morrison AC, Musk AW, Myers RH, North KE, Postma DS, Psaty BM, Rich SS, Rivadeneira F, Rochat T, Rotter JI, Soler Artigas M, Starr JM, Uitterlinden AG, Wareham NJ, Wijmenga C, Zanen P, Province MA, Silverman EK, Deary IJ, Palmer LJ, Cassano PA, Gudnason V, Barr RG, Loos RJ, Strachan DP, London SJ, Boezen HM, Probst-Hensch N, Gharib SA, Hall IP, O'Connor GT, Tobin MD, Stricker BH. Genome-wide association studies identify CHRNA5/3 and HTR4 in the development of airflow obstruction. *Am J Respir Crit Care Med* 2012; 186:622-32. PMID: 22837378 PMCID: 3480517 <http://www.ncbi.nlm.nih.gov/pmc/articles/PMC3480517>
58. Ginsburg SB, Lynch DA, Bowler RP, Schroeder JD. Automated texture-based quantification of centrilobular nodularity and centrilobular emphysema in chest CT images. *Acad Radiol* 2012; 19:1241-1251. PMID: 22958719 PMCID: 3679917 <http://www.ncbi.nlm.nih.gov/pmc/articles/PMC3679917>
59. Zach JA, Newell JD Jr, Schroeder J, Murphy JR, Curran-Everett D, Hoffman EA, Westgate PM, Han MK, Silverman EK, Crapo JD, Lynch DA, COPDGene Investigators. Quantitative computed tomography of the lungs and airways in healthy non-smoking adults. *Invest Radiol* 2012; 47:596-602. PMID: 22836310 PMCID: 3703944 <http://www.ncbi.nlm.nih.gov/pmc/articles/PMC3703944>
60. Galbán CJ, Han MK, Boes JL, Chughtai KA, Meyer CR, Johnson TD, Galbán S, Rehemtulla A, Kazerooni EA, Martinez FJ, Ross BD. CT-based biomarker provides unique signature for diagnosis of COPD phenotypes and disease progression. *Nat Med*

2012; 18:1711-1715. PMID: 23042237 PMCID: 3493851  
<http://www.ncbi.nlm.nih.gov/pubmed/23042237>

61. Fier H, Won S, Prokopenko D, AlChawa T, Ludwig KU, Fimmers R, Silverman EK, Pagano M, Mangold E, Lange C. 'Location, Location, Location': a spatial approach for rare variant analysis and an application to a study on non-syndromic cleft lip with or without cleft palate. *Bioinformatics* 2012; 28:3027-33. PMID: 23044548 PMCID: 3516147  
<http://www.ncbi.nlm.nih.gov/pmc/articles/PMC3516147>
62. Kim DK, Cho MH, Hersh CP, Lomas DA, Miller BE, Kong X, Bakke P, Gulsvik A, Agusti A, Wouters E, Celli B, Coxson H, Vestbo J, MacNee W, Yates JC, Rennard S, Litonjua A, Qiu W, Beaty TH, Crapo JD, Riley JH, Tal-Singer R, Silverman EK; on behalf of the ECLIPSE, ICGN, and COPDGene Investigators. Genome-wide association analysis of blood biomarkers in COPD. *Am J Respir Crit Care Med* 2012; 186:1238-1247. PMID: 23144326 PMCID: 3622441  
<http://www.ncbi.nlm.nih.gov/pmc/articles/PMC3622441>
63. Silverman EK, Loscalzo J. Developing new drug treatments in the era of network medicine. *Clin Pharmacol Ther* 2013; 93:26-8. PMID: 23212105 PMCID: 3545395  
<http://www.ncbi.nlm.nih.gov/pmc/articles/PMC3545395>
64. Kim SS, Seo JB, Lee HY, Nevrekar DV, Forssen AV, Crapo JD, Schroeder JD, Lynch DA. Chronic obstructive pulmonary disease: lobe-based visual assessment of volumetric CT by using standard images – comparison with quantitative CT and pulmonary function test in the COPDGene study. *Radiology* 2013; 266(2):626-35. PMID: 23220894 PMCID: 3558873  
<http://www.ncbi.nlm.nih.gov/pmc/articles/PMC3558873>
65. Hansel N, Washko G, Foreman M, Han M, Hoffman E, DeMeo D, Barr G, Van Beek E, Kazerooni E, Wise R, Brown R, Black-Shinn J, Hokanson J, Hanania N, Make B, Silverman B, Crapo J, Dransfield M, COPDGene Investigators. Racial differences in CT phenotypes in COPD. *COPD* 2013, 10(1):20-7. PMID: 23413893 PMCID: 4321889  
<http://www.ncbi.nlm.nih.gov/pmc/articles/PMC4321889>
66. Lutz S, Yip WK, Hokanson JE, Laird N, Lange C. A general semi-parametric approach to the analysis of genetic association studies in population-based designs. *BMC Genet* 2013; 14:13. PMID: 23448186 PMCID: 3648382  
<http://www.ncbi.nlm.nih.gov/pmc/articles/PMC3648382>
67. Diaz AA, Han MK, Come CE, San José Estépar R, Ross JC, Kim V, Dransfield MT, Curran-Everett D, Schroeder JD, Lynch DA, Tschirren J, Silverman EK, Washko GR. Effect of emphysema on CT scan measures of airway dimensions in smokers. *Chest* 2013; 143(3):687-93. PMID: 23460155 PMCID: 3590885  
<http://www.ncbi.nlm.nih.gov/pmc/articles/PMC3590885>
68. Han MK, Meullerova H, Curran-Everett D, Dransfield MT, Washko GR, Regan EA, Bowler RP, Beaty TH, Hokanson JE, Lynch DA, Jones PW, Anzueto A, Martinez FJ, Crapo JD, Silverman EK, and Make BJ. Implications of the GOLD 2011 disease severity classification in the COPDGene cohort. *Lancet Respiratory Medicine* 2013; 1:43-50. PMID: 24321803 PMCID: 4105297  
<http://www.ncbi.nlm.nih.gov/pmc/articles/PMC4105297>

69. Siedlinski M, Tingley D, Lipman PJ, Cho MH, Litonjua AA, Sparrow D, Bakke P, Gulsvik A, Lomas DA, Anderson W, Kong X, Rennard SI, Beaty TH, Hokanson JE, Crapo JD, Lange C, Silverman EK; and the COPDGene and ECLIPSE Investigators. Dissecting direct and indirect genetic effects on chronic obstructive pulmonary disease (COPD) susceptibility. *Hum Genet* 2013; 132:431-41. PMID: 23299987 PMCID: 3600068  
<http://www.ncbi.nlm.nih.gov/pmc/articles/PMC3600068>
70. Hersh CP, Washko GR, Estépar RS, Lutz S, Friedman PJ, Han MK, Hokanson JE, Judy PF, Lynch DA, Make BJ, Marchetti N, Newell JD Jr, Sciruba FC, Crapo JD, Silverman EK; COPDGene Investigators. Paired inspiratory-expiratory chest CT scans to assess for small airways disease in COPD. *Respir Res.* 2013; 14:42. PMID: 23566024 PMCID: 3627637  
<http://www.ncbi.nlm.nih.gov/pmc/articles/PMC3627637>
71. Zhou X, Qiu W, Sathirapongsasuti JF, Cho MH, Mancini JD, Lao T, Thibault DM, Litonjua AA, Bakke PS, Gulsvik A, Lomas DA, Beaty TH, Hersh CP, Anderson C, Geigenmuller U, Raby BA, Rennard SI, Perrella MA, Choi AMK, Quackenbush J, Silverman EK. Gene expression analysis uncovers novel hedgehog interacting protein (HHIP) effects in human bronchial epithelial cells. *Genomics* 2013; 101:263-72. PMID: 23459001 PMCID: 3659826  
<http://www.ncbi.nlm.nih.gov/pmc/articles/PMC3659826>
72. Lutz SM, Fingerlin T, Fardo DW. Statistical approaches to combine genetic association data. *J Biom Biostat* 2013 Jun; 4:1000166. PMID: 24009987 PMCID: 3760734  
<http://www.ncbi.nlm.nih.gov/pmc/articles/PMC3760734>
73. Fingerlin TE, Murphy E, Zhang W, Peljto AL, Brown KK, Steele MP, Loyd JE, Cosgrove GP, Lynch D, Groshong S, Collard HR, Wolters PJ, Bradford WZ, Kossen K, Seiwert SD, du Bois RM, Garcia CK, Devine MS, Gudmundsson G, Isaksson HJ, Kaminski N, Zhang Y, Gibson KF, Lancaster LH, Cogan JD, Mason WR, Maher TM, Molyneaux PL, Wells AU, Moffatt MF, Selman M, Pardo A, Kim DS, Crapo JD, Make BJ, Regan EA, Walek DS, Daniel JJ, Kamatani Y, Zelenika D, Smith K, McKean D, Pedersen BS, Talbert J, Kidd RN, Markin CR, Beckman KB, Lathrop M, Schwarz MI, Schwartz DA. Genome-wide association study identifies multiple susceptibility loci for pulmonary fibrosis. *Nat Genet.* 2013; 45(6):613-20. PMID: 23583980 PMCID: 3677861  
<http://www.ncbi.nlm.nih.gov/pmc/articles/PMC3677861>
74. Come CE, Diaz AA, Curran-Everett D, Muralidhar N, Hersh CP, Zach JA, Schroeder J, Lynch DA, Celli B, Washko GR. Characterizing functional lung heterogeneity in COPD using reference equations for CT scan-measured lobar volumes. *Chest.* 2013; 143(6):1607-17. PMID: 23699785 PMCID: 3673661  
<http://www.ncbi.nlm.nih.gov/pmc/articles/PMC3673661>
75. Qiao D, Mattheisen M, Lange C. On association analysis of rare variants under population substructure: an approach for the detection of subjects that can cause bias in the analysis--T opt: an outlier detection method. *Genet Epidemiol* 2013; 37:431-9. PMID: 23674291 PMCID: 3918437  
<http://www.ncbi.nlm.nih.gov/pmc/articles/PMC3918437>

76. Zulueta-Coarasa T, Kurugol S, Ross JC, Washko G, San Jose Estepar R. Emphysema classification based on embedded probabilistic PCA. *Conf Proc IEEE Eng Med Biol Soc* 2013; 2013:3969-72. PMID: 24110601 PMCID: 3918501  
<http://www.ncbi.nlm.nih.gov/pmc/articles/PMC3918501>
77. San Jose Estepar R, Kinney GL, Black-Shinn J, Bowler RP, Kindlmann G, Ross JC, Kikinis R, Han MK, Come C, Diaz AA, Cho MH, Hersh CP, Schroeder J, Reilly JJ, Lynch DA, Crapo JD, Wells JM, Dransfield M, Hokanson JE, Washko GR and the COPD Gene Study. Computed tomographic measures of pulmonary vascular morphology in smokers and their clinical implications. *Am J Respir Crit Care Med*. Jul 15, 2013; 188(2): 231–239. PMID: 23656466 PMCID: 3778757  
<http://www.ncbi.nlm.nih.gov/pmc/articles/PMC3778757>
78. Bahr TM, Hughes GJ, Armstrong M, Reisdorph R, Coldren CD, Edwards MG, Schnell C, Kedl R, Laflamme DJ, Reisdorph N, Kechris KJ, Bowler RP. Peripheral Blood Mononuclear Cell Gene Expression in Chronic Obstructive Pulmonary Disease. *Am J Respir Cell Mol Biol* 2013; 49(2):316-23. PMID: 23590301 PMCID: 3824029  
<http://www.ncbi.nlm.nih.gov/pmc/articles/PMC3824029>
79. Carolan BJ, Kim Y, Williams AA, Kechris K, Lutz S, Reisdorph N; Bowler RP. The association of adiponectin with computed tomography phenotypes in chronic obstructive pulmonary disease. *Am J Respir Crit Care Med* 2013; 188:561-6. PMID: 23777323 PMCID: 3827701  
<http://www.ncbi.nlm.nih.gov/pmc/articles/PMC3827701>
80. Lynch DA and Al-Qaisi MA. Quantitative CT in COPD. *J Thorac Imaging* 2013 Sep; 28:284-90. PMID: 23748651 PMCID: 4161463  
<http://www.ncbi.nlm.nih.gov/pmc/articles/PMC4161463>
81. Schroeder JD, McKenzie AS, Zach JA, Wilson CG, Curran-Everett D, Stinson DS, Newell JD, Lynch DA. Relationships between airflow obstruction and quantitative CT measurements of emphysema, air trapping and airways in smokers with and without COPD. *AJR Am J Roentgenol* 2013; 201(3):W460-70. PMID: 23971478 PMCID: 4067052  
<http://www.ncbi.nlm.nih.gov/pmc/articles/PMC4067052>
82. Zhou JJ, Cho MH, Castaldi PJ, Hersh CP, Silverman EK, Laird NM. Heritability of Chronic Obstructive Pulmonary Disease and related phenotypes in smokers. *Am J Respir Crit Care Med*. 2013 Oct 15;188(8):941-7. PMID: 23972146 PMCID: 3826281  
<http://www.ncbi.nlm.nih.gov/pmc/articles/PMC3826281>
83. Castaldi PJ, San José Estépar R, Mendoza CS, Hersh CP, Laird N, Crapo JD, Lynch DA, Silverman EK, Washko GR. Distinct Quantitative CT emphysema patterns are associated with physiology and function in smokers. *Am J Respir Crit Care Med*. 2013 Nov 1; 188(9): 1083–1090. PMID: 23980521 PMCID: 3863741  
<http://www.ncbi.nlm.nih.gov/pmc/articles/PMC3863741>
84. Aminuddin F, Hackett TL, Stefanowicz D, Saferali A, Pare PD, Gulsvik A, Bakke P, Cho MH, Litonjua A, Lomas DA, Anderson WH, Beaty TH, Silverman EK, Sandford AJ. Nitric oxide synthase polymorphisms, gene expression and lung function in chronic obstructive pulmonary disease. *BMC Pulm Med*. 2013 Nov



- 6;13:64. PMID: 24192154 PMCID: 3827989  
<http://www.ncbi.nlm.nih.gov/pubmed/24192154>
85. Lutz SM, Vansteelandt S, Lange C. Testing for direct genetic effects using a screening step in family-based association studies. *Front Genet.* 2013; 4: 243. PMID: 24312120 PMCID: 3836057  
<http://www.ncbi.nlm.nih.gov/pmc/articles/PMC3836057>
86. Ross JC, Kindlmann GL, Okajima Y, Hatabu H, Diaz AA, Silverman EK, Washko GR, Dy J, San Jose Estepar R. Pulmonary lobe segmentation based on ridge surface sampling and shape model fitting. *Med Phys* 2013 Dec; 40:121903. PMID: 24320514 PMCID: 3843757  
<http://www.ncbi.nlm.nih.gov/pmc/articles/PMC3843757>
87. Bowler RP, Bahr TM, Hughes G, Lutz S, Kim YI, Coldren CD, Reisdorph N, Kechris KJ. Integrative omics approach identifies interleukin-16 as a biomarker of emphysema. *OMICS* 2013; 17(12):619-26. PMID: 24138069 PMCID: 3837437  
<http://www.ncbi.nlm.nih.gov/pmc/articles/PMC3837437>
88. Qiao D, Cho MH, Fier H, Bakke PS, Gulsvik A, Silverman EK, Lange C. On the simultaneous association analysis of large genomic regions: a massive multi-locus association test. *Bioinformatics* 2014; 30:157-64. PMID: 24262215 PMCID: 3892690  
<http://www.ncbi.nlm.nih.gov/pmc/articles/PMC3892690>
89. Kinney GL, Black-Shinn JL, Wan ES, Make BJ, Regan EA, Lutz S, Soler X, Silverman EK, Crapo JD, Hokanson JE, and the COPD Gene Investigators. Pulmonary function reduction in diabetes with and without Chronic Obstructive Pulmonary Disease. *Diabetes Care.* 2014 Feb;37(2):389-95. PMID: 24026562 PMCID: 3898761  
<http://www.ncbi.nlm.nih.gov/pmc/articles/PMC3898761>
90. Manichaikul A; Hoffman EA, Smolonska J; Gao W, Cho MH, Baumhauer H, Budoff M, Austin JHM, Washko GR, Carr JJ, Kaufman JD, Pottinger T, Powell CA, Wijmenga C, Zanen P, Groen HJM, Postma DS, Wanner A, Rouhani FN, Brantly ML, Powell R, Smith BM, Rabinowitz D, Raffel LJ, Hinckley Stukovsky KD, Crapo JD, Beaty TH, Hokanson JE, Silverman EK, Dupuis J, O'Connor GT, Boezen HM, Rich SS, Barr RG. Genome-wide study of percent emphysema on computed tomography in the general population. The multi-ethnic study of atherosclerosis lung/SNP health association resource study. *Am J Respir Crit Care Med* 2014; 189:408-418. PMID: 24383474 PMCID: 3977717  
<http://www.ncbi.nlm.nih.gov/pmc/articles/PMC3977717>
91. McDonald MN, Diaz AA, Ross JC, San Jose R, Zhou L, Regan EA, Muralidhar N, Come CA, Cho MH, Hersh CP, Lange C, Wouters E, Casaburi RH, Coxson HO, MacNee W, Rennard SI, Lomas DA, Agusti A, Celli BR, Black-Shinn JL, Kinney GL, Lutz SN, Hokanson JE, Silverman EK, Washko GR. Quantitative computed tomography measures of pectoralis muscle area and disease severity in Chronic Obstructive Pulmonary Disease. A cross-sectional study. *Ann Am Thorac Soc.* 2014 Mar; 11(3): 326–334. PMID: 24558953 PMCID: 4028743  
<http://www.ncbi.nlm.nih.gov/pmc/articles/PMC4028743>
92. Bhatt SP, Kim Y, Wells J, Bailey W, Ramsdell J, Foreman M, Stinson D, Wilson C, Lynch DA, Make BJ, Dransfield M. FEV1/FEV6 to diagnose airflow obstruction:

comparisons with computed tomography and morbidity indices. *Ann Am Thorac Soc*. 2014 Mar;11(3):335-41. PMID: 24450777 PMCID: 4028741  
<http://www.ncbi.nlm.nih.gov/pmc/articles/PMC4028741>

93. Cho MH, McDonald MLN, Zhou X, Mattheisen M, Castaldi PJ, Hersh CP, DeMeo D, Sylvia JS, Ziniti J, Laird N, Lange C, Litonjua A, Sparrow D, Casaburi R, Barr RG, Regan EA, Make BJ, Hokanson JE, Lutz S, Murray Dudenkov T, Farzadegan H, Hetmanski JB, Tal-Singer R, Lomas DA, Bakke P, Gulsvik A, Crapo JD, Silverman EK, Beaty TH, on behalf of the NETT Genetics, ICGN, ECLIPSE and COPDGene Investigators. Risk loci for chronic obstructive pulmonary disease: a genome-wide association study and meta-analysis. *Lancet Respir Med*. 2014 Mar;2(3):214-25. PMID: 24621683 PMCID: 4176924  
<https://www.ncbi.nlm.nih.gov/pmc/articles/PMC4176924>
94. Martinez C, Kim V, Chen Y, Kazerooni E, Murray S, Criner GJ, Curtis J, Regan EA, Wan E, Hersh CP, Silverman EK, Crapo JD, Martinez F, Han MK. The clinical impact of non-obstructive chronic bronchitis in current and former smokers. *Respir Med*. 2014 Mar;108(3):491-9. PMID: 24280543 PMCID: 3943716  
<https://www.ncbi.nlm.nih.gov/pmc/articles/PMC3943716>
95. Washko GR, Diaz AA, Kim V, Barr RG, Dransfield MT, Schroeder J, Reilly, JJ, Ramsdell JW, McKenzie A, Van Beek EJ, Lynch DA, Butler JP, Han MK. Computed tomographic measures of airway morphology in smokers and never-smoking normals. *J Appl Physiol* (1985). 2014 Mar 15;116(6):668-73. PMID: 24436301 PMCID: 3949240  
<http://www.ncbi.nlm.nih.gov/pmc/articles/PMC3949240>
96. Nava R, Escalante-Ramírez B, Cristóbal G, San José Estepar R. Extended Gabor approach applied to classification of emphysematous patterns in computed tomography. *Med Biol Eng Comput*. 2014 Apr; 52(4): 393–403. PMID: 24496558 PMCID: 4254807  
<http://www.ncbi.nlm.nih.gov/pmc/articles/PMC4254807>
97. Kim V, Davey A, Comellas AP, Han MK, Washko G, Martinez CH, Lynch D, Lee JH, Silverman EK, Crapo JD, Make BJ, Criner GJ, and the COPDGene Investigators. Clinical and computed tomographic predictors of chronic bronchitis in COPD: a cross sectional analysis of the COPDGene study. *Respiratory Research* 2014, 15:52 PMID: 24766722 PMCID: 4067738  
<http://www.ncbi.nlm.nih.gov/pmc/articles/PMC4067738>
98. Sverzellati N, Lynch DA, Pistolesi M, Kauczor HU, Grenier PA, Wilson C, Crapo JD, on behalf of the COPDGene CT workshop group. Physiologic and quantitative computed tomography differences between centrilobular and panlobular emphysema in COPD. *Chronic Obstr Pulm Dis* (Miami). 1(1):125-132 PMID: 26029738 PMCID: 4447143  
<http://www.ncbi.nlm.nih.gov/pmc/articles/PMC4447143>
99. Bhatt SP, Sieren JC, Dransfield MT, Washko GR, Newell JD Jr, Stinson DA, Zamba GK, Hoffman EA; for the COPDGene Investigators. Comparison of spirometric thresholds in diagnosing smoking related airflow obstruction. *Thorax*. 2014 May;69(5):409-14. PMID: 23525095 PMCID: 4146523  
<http://www.ncbi.nlm.nih.gov/pmc/articles/PMC4146523>

100. Castaldi PJ, Dy J, Ross JC, Chang Y, Washko GR, Curran-Everett D, Williams A, Lynch DA, Make BJ, Crapo JD, Bowler RP, Regan EA, Hokanson JE, Kinney GL, Han MK, Soler X, Ramsdell JR, Barr RG, Foreman MG, van Beek EJ, Casaburi R, Criner GJ, Lutz SM, Rennard SI, Santorico S, Sciurba FC, Hersh CP, Silverman EK, Cho MH. Cluster analysis in the COPDGene study identifies subtypes of smokers with distinct patterns of airway disease and emphysema. *Thorax* 2014; 69:415-422. PMID: 24563194 PMCID: 4004338  
<http://www.ncbi.nlm.nih.gov/pmc/articles/PMC4004338>
101. Putcha N, Han MK, Martinez CH, Foreman MG, Anzueto AR, Casaburi R, Cho MH, Hanania NA, Hersh CP, Kinney GL, Make BJ, Steiner RM, Lutz SM, Thomashow BM, Williams AA, Bhatt SP, Beaty TH, Bowler RP, Ramsdell JW, Curtis JL, Everett D, Hokanson JE, Lynch DA, Sutherland ER, Silverman EK, Crapo JD, Wise RA, Regan EA, Hansel NN and the COPDGene Investigators. Comorbidities of COPD have a major impact on clinical outcomes, particularly in African Americans. *J COPD F*, May 2014; 1(1):105-114. PMID: 25695106 PMCID: 4329763  
<http://www.ncbi.nlm.nih.gov/pmc/articles/PMC4329763>
102. Kim SS, Yagihashi K, Stinson DS, Zach JA, McKenzie AS, Curran-Everett D, Wan ES, Silverman EK, Crapo JD, Lynch DA. Visual assessment of CT findings in smokers with nonobstructed spirometric abnormalities in the COPDGene study. *Chronic Obstr Pulm Dis (Miami)*. 2014; 1(1): 88–96. PMID: 25197723 PMCID: 4153727  
<http://www.ncbi.nlm.nih.gov/pmc/articles/PMC4153727>
103. McDonald ML, Cho MH, Sorheim IC, Lutz SM, Castaldi P, Lomas DA, Coxson HO, Edwards LD, MacNee W, Vestbo J, Yates JC, Agusti A, Calverley PM, Celli B, Crim C, Rennard SI, Wouters EF, Bakke P, Tal-Singer R, Miller BE, Gulsvik A, Casaburi R, Wells JM, Regan EA, Make BJ, Hokanson JE, Lange C, Crapo JD, Beaty TH, Silverman EK, Hersh CP. Common genetic variants associated with resting oxygenation in Chronic Obstructive Pulmonary Disease. *Am J Respir Cell Mol Biol*. 2014 Nov; 51(5):678-87. PMID: 24825563 PMCID: 4224086  
<http://www.ncbi.nlm.nih.gov/pmc/articles/PMC4224086>
104. Black-Shinn J, Kinney GL, Wise AL, Regan EA, Make BJ, Krantz MJ, Barr RG, Murphy JR, Lynch D, Silverman EK, Crapo JD, Hokanson JE and the COPDGene Investigators. Cardiovascular disease is associated with COPD severity and reduced functional status and quality of life. *COPD*, 2014 Sep; 11(5): 546-51. PMID: 24831864 PMCID: 4467820  
<http://www.ncbi.nlm.nih.gov/pmc/articles/PMC4467820>
105. Hardin M, Cho MH, McDonald ML, Beaty TH, Ramsdell J, Bhatt SP, Van Beek EJ, Make BJ, Crapo JD, Silverman EK, Hersh CP. The clinical and genetic features of the COPD-asthma overlap syndrome. *Eur Respir J*. 2014 May 29; 15(1):62. PMID: 24876173 PMCID: 4154588  
<http://www.ncbi.nlm.nih.gov/pmc/articles/PMC4154588>
106. Martinez CH, Okajima Y, Murray S, Washko GR, Martinez FJ, Silverman EK, Lee JH, Regan EA, Crapo JD, Curtis JL, Hatabu H and Han MK. Impact of self-reported gastroesophageal reflux disease in subjects from the COPDGene cohort. *Respir Res*.



2014 Jun 3; 15(1):62. PMID: 24894541 PMCID: 4049804  
<http://www.ncbi.nlm.nih.gov/pmc/articles/PMC4049804>

107. Bowler RP, Kim V, Regan EA, Williams A, Santorico S, Make BJ, Lynch D, Hokanson JE, Washko GR, Berez P, Soler X, Marchetti N, Criner GJ, Ramsdell J, Han MK, DeMeo D, Anzueto A, Comellas A, Crapo JD, Dransfield M, Wells JM, Hersh CP, MacIntyre N, Martinez F, Nath HP, Niewoehner D, Sciruba F, Sharafkhaneh A, Silverman EK, van Beek EJ, Wilson C, Wendt C, Wise RA, for the COPDGene Investigators. Prediction of acute respiratory disease in current and former smokers with and without COPD. *Chest* 2014 Oct 1; 146(4): 941-950. PMID: 24945159 PMCID: 4188150  
<http://www.ncbi.nlm.nih.gov/pmc/articles/PMC4188150>
108. Chu JH, Hersh CP, Castaldi P, Cho MH, Raby B, Laird N, Bowler RP, Rennard S, Loscalzo J, Quackenbush J, Silverman EK. Analyzing networks of phenotypes in complex diseases: methodology and applications in COPD. *BMC Systems Biology* 2014, 8:78. PMID: 24964944 PMCID: 4105829  
<http://www.ncbi.nlm.nih.gov/pmc/articles/PMC4105829>
109. Koeverden I, Blanc P, Bowler RP, Arjomandi M. Secondhand tobacco smoke and COPD risk in smokers: A COPDGene study cohort subgroup analysis. *COPD*. 2015 Apr; 12(2): 182–189. PMID: 24983136 PMCID: 4820340  
<http://www.ncbi.nlm.nih.gov/pmc/articles/PMC4820340>
110. Lutz SM, Hokanson JE, Lange C. An alternative hypothesis testing strategy for secondary phenotype data in case-control genetic association studies. *Front Genet*. 2014; 5: 188. PMID: 25071819 PMCID: 4076613  
<http://www.ncbi.nlm.nih.gov/pmc/articles/PMC4076613>
111. Bhatt SP, Sieren JC, Newell J, Comellas AP, Hoffman EA. Disproportionate contribution of right middle lobe to emphysema and gas trapping on computed tomography. *PLOS One* 2014, 9:7. PMID: 25054539 PMCID: 4108372  
<http://www.ncbi.nlm.nih.gov/pmc/articles/PMC4108372>
112. Kim V, Desai P, Newell JD, Make BJ, Washko GR, Silverman EK, Crapo JD, Bhatt SP, and Criner GJ. Airway wall thickness is increased in COPD patients with bronchodilator responsiveness. *Respiratory Research* 2014, 15:84. PMID: 25248436 PMCID: 4198908  
<http://www.ncbi.nlm.nih.gov/pmc/articles/PMC4198908>
113. Wan ES, Castaldi PJ, Cho MH, Hokanson JE, Regan EA, Make BJ, Beaty TH, Han MK, Curtis JL, Curran-Everett DC, Lynch DA, DeMeo DL, Crapo JD, Silverman EK, and the COPDGene Investigators. Epidemiology, genetics, and subtyping of Preserved Ratio Impaired Spirometry (PRISm) in COPDGene. *Respir Res* 2014; 15(1):89. PMID: 25096860 PMCID: 4256936  
<http://www.ncbi.nlm.nih.gov/pmc/articles/PMC4256936>
114. Lee JH, Cho MH, Hersh CP, McDonald MN, Wells JM, Dransfield MT, Bowler RP, Lynch DA, Lomas DA, Crapo JD, Silverman EK on behalf of the COPDGene and ECLIPSE Investigators. IREB2 and GALC are associated with pulmonary artery enlargement in chronic obstructive pulmonary disease. *Am J Respir Cell Mol Biol* 2015

Mar; 52(3):365-376. PMID: 25101718 PMCID: 4370263  
<http://www.ncbi.nlm.nih.gov/pmc/articles/PMC4370263>

115. Lee JH, Cho MH, McDonald MN, Hersh CP, Castaldi PJ, Crapo JD, Wan ES, Dy J, Chang Y, Regan EA, Hardin M, DeMeo D, Silverman EK and the COPDGene Investigators. Phenotypic and genetic heterogeneity among subjects with mild airflow obstruction in COPDGene. *Respiratory Medicine*, 2014 Aug 11. PMID: 25154699 PMCID: 4253548  
<http://www.ncbi.nlm.nih.gov/pmc/articles/PMC4253548>
116. Parker MM, Foreman MG, Abel HJ, Mathias RA, Hetmanksi JB, Crapo JD, Silverman EK, Beaty TH, COPDGene Investigators. Admixture mapping identifies a quantitative trait locus associated with FEV1 /FVC in the COPDGene study. *Genet Epidemiol*. 2014 Nov;38(7):652-9. PMID: 25112515 PMCID: 4190160  
<http://www.ncbi.nlm.nih.gov/pmc/articles/PMC4190160>
117. Castaldi PJ, Cho MH, San Jose Estepar R, McDonald ML, Laird N, Beaty TH, Washko G, Crapo JD, Silverman EK and the COPDGene Investigators. Genome-wide association identifies regulatory loci associated with distinct local histogram emphysema patterns. *Am J Respir Crit Care Med* 2014 Aug 15; 190(4):399-409. PMID: 25006744 PMCID: 4214129  
<http://www.ncbi.nlm.nih.gov/pubmed/25006744>
118. Marchetti N, Garshick E, Kinney GL, McKenzie A, Stinson D, Lutz S, Lynch DA, Criner GJ, Silverman EK, Crapo JD; COPDGene Investigators. Association between occupational exposure and lung function, respiratory symptoms and high resolution CT imaging in COPDGene. *Am J Respir Crit Care Med*. 2014 Oct 1; 190(7):756-62. PMID: 25133327 PMCID: 4299608  
<http://www.ncbi.nlm.nih.gov/pmc/articles/PMC4299608>
119. Lee JH, McDonald MN, Cho MH, Wan ES, Castaldi PJ, Hunninghake GM, Marchetti N, Lynch DA, Crapo JD, Lomas DA, Coxson HO, Bakke PS, Silverman EK, Hersh CP. DNAH5 is associated with total lung capacity in Chronic Obstructive Pulmonary Disease. *Respiratory Research* 2014, 15:97 PMID: 25134640 PMCID: 4169636  
<http://www.ncbi.nlm.nih.gov/pmc/articles/PMC4169636>
120. McDonald ML, Mattheisen M, Cho MH, Liu YY, Harshfield B, Hersh CP, Bakke P, Gulsvik A, Lange C, Beaty TH, Silverman EK. Beyond GWAS in COPD: Probing the landscape between gene-set associations, genome-wide associations and protein-protein interaction networks. *Hum Hered*. 2014 Aug 27;78(3):131-139. PMID: 25171373 PMCID: 4415367  
<http://www.ncbi.nlm.nih.gov/pmc/articles/PMC4415367>
121. Lutz SM, Hokanson JE. Genetic influences on smoking and clinical disease. Understanding behavioral and biological pathways and mediation analysis. *Annals of the American Thoracic Society*, Vol. 11, No. 7 (2014), pp. 1082-1083. PMID: 25237988 PMCID: 4214059  
<http://www.ncbi.nlm.nih.gov/pmc/articles/PMC4214059>
122. Batmanghelich KN, Cho M, Jose RS, Golland P. Spherical topic models for imaging phenotype discovery in genetic studies. *Bayesian Graph Models Biomed*

Imaging. 2014; 8677: 107–117. PMID: 25717477 PMCID: 4337963  
<http://www.ncbi.nlm.nih.gov/pmc/articles/PMC4337963>

123. Lee JH, Cho MH, Hersh CP, McDonald MN, Crapo JD, Bakke PS, Gulsvik A, Comellas AP, Wendt CH, Lomas DA, Kim V, Silverman EK, and on behalf of the COPDGene and ECLIPSE Investigators. Genetic susceptibility for chronic bronchitis in chronic obstructive pulmonary disease. *Respiratory Research*. 2014; 15(1): 113. PMID: 25241909 PMCID: 4190389  
<http://www.ncbi.nlm.nih.gov/pmc/articles/PMC4190389>
124. Kim V, Goel N, Gangar J, Zhao H, Ciccolella DE, Silverman EK, Crapo JD, Criner GJ and the COPDGene Investigators. Risk factors for venous thromboembolism in chronic obstructive pulmonary disease. *Chronic Obstr Pulm Dis (Miami)*. 2014; 1(2): 239–249. PMID: 25844397 PMCID: 4382082  
<http://www.ncbi.nlm.nih.gov/pmc/articles/PMC4382082>
125. Castaldi PJ, Cho MH, Zhou X, Qiu W, McGeachie M, Celli B, Bakke P, Gulsvik A, Lomas DA, Crapo JD, Beaty TH, Rennard S, Harshfield B, Lange C, Singh D, Tal-Singer R, Riley J, Quackenbush J, Raby BA, Carey VJ, Silverman EK, Hersh CP. Genetic control of gene expression at novel and established chronic obstructive pulmonary disease loci. *Hum Mol Genet* 2015 Feb 15; 24(4):1200-10. PMID: 25315895 PMCID: 4806382  
<http://www.ncbi.nlm.nih.gov/pmc/articles/PMC4806382>
126. Park S, Foreman MG, DeMeo DL, Bhatt SP, Hansel NN, Wise RA, Soler X, Bowler RP. Menthol cigarette smoking in the COPDGene cohort: Relationship with COPD, comorbidities and CT metrics. *Respirology*. 2015 Jan;20(1):108-14. PMID: 25328036 PMCID: 4415502  
<http://www.ncbi.nlm.nih.gov/pmc/articles/PMC4415502>
127. Hersh CP, Make BJ, Lynch DA, Barr RG, Bowler RP, Calverley PMA, Castaldi PJ, Cho MH, Coxson HO, Demeo DL, Foreman MG, Han MK, Harshfield BJ, Hokanson JE, Lutz S, Ramsdell JW, Regan EA, Rennard SI, Schroeder JD, Sciruba FC, Steiner RM, Tal-Singer R, Van Beek EJR, Silverman EK, Crapo JD and the COPDGene Investigators. Non-emphysematous chronic obstructive pulmonary disease is associated with diabetes mellitus. *BMC Pulm Med* 2014 Oct 24; 14(1):164. PMID: 25341556 PMCID: 4216374  
<http://www.ncbi.nlm.nih.gov/pmc/articles/PMC4216374>
128. Hobbs BD, Foreman MG, Bowler RP, Jacobson F, Make BJ, Castaldi PJ, San Jose Estepar R, Silverman EK, Hersh CP, COPDGene. Pneumothorax risk factors in smokers with and without Chronic Obstructive Pulmonary Disease. *Ann Am Thorac Soc* 2014 Nov 1; 11(9):1387-1384. PMID: 25295410 PMCID: 4298989  
<http://www.ncbi.nlm.nih.gov/pmc/articles/PMC4298989>
129. Bhatt SP, Wells JM, Kim V, Criner GJ, Hersh CP, Hardin M, Bailey WC, Nath H, Kim YI, Foreman MG, Stinson DS, Wilson CG, Rennard SI, Silverman EK, Make BJ, Dransfield MT; for the COPDGene Investigators. Radiological correlates and clinical implications of the paradoxical lung function response to Beta2 agonists: an observational study. *Lancet Respir Med* 2014 Nov; 2(11):911-

8. PMID: 25217076 PMCID: 4306040  
<http://www.ncbi.nlm.nih.gov/pmc/articles/PMC4306040>
130. Diaz AA, Hardin ME, Come CE, Estépar RS, Ross JC, Kurugol S, Okajima Y, Han MK, Kim V, Ramsdell J, Silverman EK, Crapo JD, Lynch DA, Make BJ, Barr RG, Hersh CP, Washko GR, for the COPDGene Investigators. Childhood-onset asthma in smokers: Association between CT measures of airway size, lung function and chronic airflow obstruction. *Ann Am Thorac Soc* 2014 Nov 11; 11(9):1371-1378. PMID: 25296268 PMCID: 4298990  
<http://www.ncbi.nlm.nih.gov/pmc/articles/PMC4298990>
131. Diaz AA, Hardin M, Come C, San Jose Estepar R, Ross J, Kurugol S, Okajima Y, Han MK, Kim V, Ramsdell J, Silverman EK, Crapo JD, Lynch D, Make BJ, Barr RG, Hersh CP, Washko GR. Childhood-onset asthma in smokers: Association between CT measures of airway size, lung function and COPD. *Ann Am Thorac Soc* 2014 Nov; 11(9):1371-8 PMID: 25296268 PMCID: 4298990  
<https://www.ncbi.nlm.nih.gov/pmc/articles/PMC4298990>
132. Bowler RP, Jacobson S, Cruickshank-Quinn C, Hughes G, Siska C, Ory D, Petrache I, Schaffer J, Reisdorph N, Kechris K. Plasma sphingolipids associated with COPD phenotypes. *Am J Respir Crit Care Med*. 2015 Feb 1; 191(3):275-84. PMID: 25494452 PMCID: 4351578  
<http://www.ncbi.nlm.nih.gov/pmc/articles/PMC4351578>
133. Kurugol S, Washko GR, San Jose Estepar R. Ranking and classification of monotonic emphysema patterns with a multi-class hierarchical approach. *Proc IEEE Int Symp Biomed Imaging*. Author manuscript; available in PMC 2014 Dec 4. PMID: 25485040 PMCID: 4254822  
<http://www.ncbi.nlm.nih.gov/pmc/articles/PMC4254822>
134. Putcha N, Puhan M, Drummand B, Han M, Regan EA, Hanania N, Martinez C, Bhatt S, Make BJ, Ramsdell J, DeMeo D, Barr RG, Rennard SI, Martinez F, Silverman EK, Crapo JD, Wise R, Hansel NN. A simplified score to quantify comorbidity in COPD. *PLOS One* 2014 Dec 16; 9(12):e114438. PMID: 25514500 PMCID: 4267736  
<http://www.ncbi.nlm.nih.gov/pmc/articles/PMC4267736>
135. Stanley SE, Chen JL, Podlevsky JD, Alder JK, Hansel NN, Mathias RA, Qi X, Rafaels NM, Wise RA, Silverman EK, Barnes KC, Armanios M. Telomerase mutations in smokers with severe emphysema. *J Clin Invest*. 2015 Feb; 125(2):563-70. PMID: 25562321 PMCID: 4319417  
<http://www.ncbi.nlm.nih.gov/pmc/articles/PMC4319417>
136. Newell JD, Fuld MK, Allmendinger T, Sieren JP, Chan KS, Guo J, Hoffman EA. Very low-dose (0.15 mGy) chest CT protocols using the COPDGene 2 test object and a third-generation dual-source CT scanner with corresponding third-generation iterative reconstruction software. *Invest Radiol*. 2015 Jan; 50(1): 40–45. PMID: 25198834 PMCID: 4294320  
<http://www.ncbi.nlm.nih.gov/pmc/articles/PMC4294320>
137. Dijkstra AE, Boezen HM, VandenBerg M, Vonk JM, Hiemstra PS, Barr RG, Burkart KM, Manichaikul A, Pottinger TD, Silverman EK, Cho MH, Crapo JD, Beaty TH, Bakke P, Gulsvik A, Lomas DA, Bosse Y, Nickle DC, Pare PD, De Koning HJ,

- Lammers JWJ, Zannen P, Smolonska J, Wijmenga C, Brandsma CA, Groen HJ, Postma DS. Dissecting genetics for chronic mucus hypersecretion in smokers with and without COPD. *Eur Respir J* 2015 Jan; 45(1):60-75. PMID: 25234806 PMCID: 4498483  
<http://www.ncbi.nlm.nih.gov/pmc/articles/PMC4498483>
138. Diaz AA, Young TP, Kurugol S, Eckbo E, Muralidhar N, Chapman JK, Kinney GL, Ross JC, Estepar RSJ, Harmouche R, Black-Shinn JL, Budoff M, Bowler RP, Hokanson J, Washko GR for the COPDGene investigators. Abdominal Visceral Adipose Tissue is Associated with Myocardial Infarction in Patients with COPD. *Chronic Obstr Pulm Dis (Miami)*. 2015; 2(1): 8–16. PMID: 25914898 PMCID: 4408419  
<http://www.ncbi.nlm.nih.gov/pmc/articles/PMC4408419>
139. Chen W, Brehm JM, Manichaikul A, Cho MH, Boutaoui N, Yan Q, Burkart KM, Enright PL, Rotter JI, Petersen H, Leng S, Obeidat M, Bosse Y, Brandsma CA, Hao K, Rich SS, Powell R, Avila L, Soto-Quiros M, Silverman EK, Tesfigzi Y, Barr RG, Celedon JC. A genome-wide association study of Chronic Obstructive Pulmonary Disease in Hispanics. *Ann Am Thorac Soc*. 2015 Jan 13. PMID: 25584925 PMCID: 4418314  
<http://www.ncbi.nlm.nih.gov/pmc/articles/PMC4418314>
140. Diaz AA, Rahaghi F, Ross JC, Harmouche R, Tschirren J, San Jose Estepar R, Washko GR, for the COPDGene Investigators. Understanding the contribution of native tracheobronchial structure to lung function: CT assessment of airway morphology in never smokers. *Respir Res*. 2015; 16(1):23. PMID: 25848985 PMCID: 4335784  
<http://www.ncbi.nlm.nih.gov/pmc/articles/PMC4335784>
141. Jaramillo JD, Wilson C, Stinson DJ, Lynch DA, Bowler RP, Lutz S, Bon J, Arnold B, MacDonald MN, Washko GR, Wan ES, DeMeo DL, Foreman MG, Soler X, Lindsay SE, Lane NE, Genant HK, Silverman EK, Hokanson JE, Make BJ, Crapo JD, Regan EA; the COPDGene investigators. Reduced bone density and vertebral fractures in smokers: men and COPD patients at increased risk. *Ann Am Thorac Soc*. 2015 Feb 26. PMID: 25719895 PMCID: 4418341  
<http://www.ncbi.nlm.nih.gov/pmc/articles/PMC4418341>
142. Kim V, Crapo JD, Zhao H, Jones PW, Silverman EK, Comellas A, Make BJ, Criner GJ, and the COPDGene Investigators. Comparison between an alternative and the classic definition of chronic bronchitis in the COPDGene study. *Ann Am Thorac Soc*. 2015 Mar 1; 12(3):332-339. PMID: 25575351 PMCID: 4418311  
<http://www.ncbi.nlm.nih.gov/pmc/articles/PMC4418311>
143. Wells JM, Iyer AS, Rahaghi FN, Bhatt SP, Gupta H, Denney TS, Lloyd SG, Dell'Italia LJ, Nath H, San Jose Estepar R, Washko GR, Dransfield MT. Pulmonary artery enlargement is associated with RV dysfunction and loss of blood volume in small pulmonary vessels in Chronic Obstructive Pulmonary Disease. *Cardiovascular Imaging*. 2015; 8: e002546 PMID: 25855668 PMCID: 4392846  
<http://www.ncbi.nlm.nih.gov/pmc/articles/PMC4392846>
144. Chen LS, Hung RJ, Baker T, Horton A, Culverhouse R, Saccone N, Cheng I, Deng B, Han Y, Hansen HM, Horsman J, Kim C, Lutz S, Rosenberger A, Aben KK, Andrew AS, Breslau N, Chang SC, Dieffenbach AK, Dienemann H, Freseriksen B, Han



- J, Hatsukami DK, Johnson EO, Pande M, Wrensch MR, McLaughlin J, Skaug V, van der Heijden HF, Wampfler J, Wenzlaff A, Woll P, Zienolddiny S, Bickeboller H, Brenner H, Duell EJ, Haugen A, Heinrich J, Hokanson JE, Hunter DJ, Kiemeny LA, Lazarus P, Marchand LL, Liu G, Mayordomo, Risch A, Schwartz AG, Teare D, Wu X, Wiencke JK, Yang P, Zhang ZF, Spitz MR, Kraft P, Amos CI, Beirut LJ. CHRNA5 risk variant predicts delayed smoking cessation and earlier lung cancer diagnosis- a meta-analysis. *J Natl Cancer Inst.* 2015 Apr 14;107(5). PMID: 25873736 PMCID: 4822525  
<http://www.ncbi.nlm.nih.gov/pmc/articles/PMC4822525>
145. Wan ES, Qui W, Morrow J, Beaty TH, Hetmanski J, Make BJ, Lomas DA, Silverman EK, Demeo DL. Genome-wide site-specific differential methylation in the blood of individuals with Klinefelter syndrome. *Mol Reprod Dev.* 2015 May;82(5):377-86. PMID: 25988574 PMCID: 4439255  
<http://www.ncbi.nlm.nih.gov/pmc/articles/PMC4439255>
146. Lynch DA, Austin JHM, Hogg JC, Grenier PA, Kauczor HU, Bankier AA, Barr RG, Colby TV, Galvin JR, Gevenois PA, Coxson H, Hoffman EA, Newell JD, Pistolesi M, Silverman EK, Crapo JD. CT-Definable subtypes of Chronic Obstructive Pulmonary Disease: A statement of the Fleischner Society. *Radiology* 2015 Oct; 277(1):192-205. PMID: 25961632 PMCID: 4613878  
<https://www.ncbi.nlm.nih.gov/pmc/articles/PMC4613878>
147. Soriano JB, Lamprecht B, Ramírez AS, Martínez-Cambor P, Kaiser B, Alfageme I, Almagro P, Casanova C, Esteban C, Soler-Cataluña JJ, de-Torres JP, Miravittles M, Celli BR, Marin JM, Puhán MA, Sobradillo P, Lange P, Sternberg AL, Garcia-Aymerich J, Turner AM, Han MK, Langhammer A, Leivseth L, Bakke P, Johannessen A, Roche N, Sin DD. Mortality prediction in chronic obstructive pulmonary disease comparing the GOLD 2007 and 2011 staging systems: a pooled analysis of individual patient data. *Lancet Respir Med.* 2015 Jun;3(6):443-50. PMID: 25995071 PMCID:  
<http://www.ncbi.nlm.nih.gov/pubmed/25995071> (abstract)
148. Regan EA, Lynch DA, Curran-Everett D, Curtis JL, Austin JHM, Grenier PA, Kauczor HU, Bailey W, DeMeo D, Casaburi RH, Friedman P, Van Beek EJR, Hokanson JE, Bowler RP, Beaty TH, Washko GR, Han MK, Kim V, Kim SS, Yagihashi K, Wasington L, McEvoy C, Tanner C, Mannino DM, Make BJ, Silverman EK, Crapo JD, Genetic Epidemiology of COPD (COPDGene) Investigators. Clinical and radiologic disease in smokers with normal spirometry. *JAMA Intern Med.* 2015 Sep 1; 175(9): 1539–1549. PMID: 26098755 PMCID: 4564354  
<http://www.ncbi.nlm.nih.gov/pmc/articles/PMC4564354>
149. Batmanghelich NK, Saeedi A, Cho M, Estepar RS, Golland P. Generative method to discover genetically driven image biomarkers. *Inf Process Med Imaging* 2015 Jul; 24:30-42. PMID: 26221665 PMCID: 4527679  
<http://www.ncbi.nlm.nih.gov/pmc/articles/PMC4527679>
150. Meek P, Petersen H, Washko GR, Diaz AA, Kim V, Sood A, Tesfaigzi Y. Chronic bronchitis is associated with worse symptoms and quality of life than chronic airflow obstruction. *Chest* 2015 Aug; 148(2):408-16. PMID: 25741880 PMCID: 4524327  
<http://www.ncbi.nlm.nih.gov/pmc/articles/PMC4524327>

151. Wan ES, Qiu W, Carey VJ, Morrow J, Bacherman H, Foreman MG, Hokanson JE, Bowler RP, Crapo JD, DeMeo DL. Smoking associated site-specific methylation in buccal mucosa in the COPDGene study. *Am J Respir Crit Cell Mol Biol* 2015 Aug; 53(2):246-254. PMID: 25517428 PMCID: 4566042  
<http://www.ncbi.nlm.nih.gov/pmc/articles/PMC4566042>
152. Park SJ, Make BJ, Hersh CP, Bowler RP. Significance of medication history at the time of entry into the COPDGene study: relationship with exacerbation and CT metrics. *COPD* 2015 Aug; 12(4):366-373. PMID: 25254928 PMCID: 4620928  
<http://www.ncbi.nlm.nih.gov/pmc/articles/PMC4620928>
153. Hancock DB, Reginsson GW, Gaddis NC, Chen X, Saccone NL, Lutz SM, Qaiser B, Sherva R, Steinberg S, Zink F, Stacey SN, Glasheen C, Chen J, Gu F, Frederiksen BN, Loukola A, Gudbjatsson DF, Bruske I, Landi MT, Bickeboller H, Madden P, Farrer L, Japrio J, Kranzler H, Gelernter J, Baker TB, Kraft P, Amos CI, Caporaso NE, Hokanson JE, Bierut LJ, Thorgeirsson TE, Johnson EO, and Stefansson K. Genome-wide meta-analysis reveals common splice site acceptor variant in CHRNA4 associated with nicotine dependence. *Transl Psychiatry* 2015 Oct 6; 5(10):e651. PMID: 26440539 PMCID: 4930126  
<http://www.ncbi.nlm.nih.gov/pmc/articles/PMC4930126>
154. Kurugol S, San Jose Estepar R, Washko GR, Diaz A, Ross JC, Come C, Kinney GL, Hokanson JE, Budoff M, Black-Shinn J. Automated quantitative 3D analysis of aorta size, morphology, and mural calcification distributions. *Med Phys* 2015 Sept; 42(9):5467. PMID: 26328995 PMCID: 4552704  
<http://www.ncbi.nlm.nih.gov/pmc/articles/PMC4552704>
155. Cho MH, Castaldi PJ, Hersh CP, Hobbs BD, Barr RG, Tal-Singer R, Bakke P, Gulsvik A, San José Estépar R, Van Beek EJR, Coxson HO, Lynch DA, Washko GR, Laird NM, Crapo JD, Beaty TH, Silverman EK, on behalf of the NETT Genetics, ECLIPSE, and COPDGene Investigators. A genome-wide association study of emphysema and airway quantitative imaging phenotypes. *Am J Respir Crit Care Med* 2015 Sept 1; 192(5):559-569 PMID: 26030696 PMCID: 4595690  
<http://www.ncbi.nlm.nih.gov/pmc/articles/PMC4595690>
156. Boes JL, Bule M, Hoff BA, Chamberlain R, Lynch DA, Stoganovska J, Martinez FJ, Han MK, Kazerooni EA, Ross BD, Galbán CJ. The impact of sources of variability on parametric response mapping of lung CT scans. *Tomography* 2015 Sept; 1(1):69-77. PMID: 26568983 PMCID: 4643661  
<http://www.ncbi.nlm.nih.gov/pmc/articles/PMC4643661>
157. Hayden LP, Hobbs BD, Cohen RT, Wise RA, Checkley W, Crapo JD, Hersh CP, on behalf of the COPDGene Investigators. Childhood pneumonia increases risk for chronic obstructive pulmonary disease: the COPDGene Study. *Respir Res.* 2015; 16(1): 115. PMID: 26392057 PMCID: 4578796  
<http://www.ncbi.nlm.nih.gov/pmc/articles/PMC4578796>
158. Fenster BE, Holm KE, Weinberger HD, Moreau KL, Meschede K, Crapo JD, Make BJ, Bowler RP, Wamboldt FS, Hoth KF. Right ventricular diastolic function and exercise capacity in COPD. *Respir Med.* 2015 Oct;109(10):1287-

92. PMID: 26371994 PMCID: 4745988  
<https://www.ncbi.nlm.nih.gov/pmc/articles/PMC4745988>
159. Kliment CR, Araki T, Doyle TJ, Gao W, Dupuis J, Latourelle JC, Zazueta OE, Fernandez IE, Nishino M, Okajima Y, Ross JC, San José Estépar R, Diaz AA, Lederer DJ, Schwartz DA, Silverman EK, Rosas IO, Washko GR, O'Connor GT, Hatabu H, Hunninghake GM. A comparison of visual and quantitative methods to identify interstitial lung abnormalities. *BMC Pulm Med* 2015 Oct 29; 15:134. PMID: 26514822 PMCID: 4625729  
<http://www.ncbi.nlm.nih.gov/pmc/articles/PMC4625729>
160. Valipour A, Shah PL, Gesierich W, Eberhardt R, Snell G, Strange C, Barry R, Gupta A, Henne E, Bandyopadhyay S, Raffy P, Yin Y, Tschirren J, Herth JFH. Patterns of emphysema heterogeneity. *Respiration*. 2015 Nov; 90(5):402-11. PMID: 26430783 PMCID: 4756593  
<http://www.ncbi.nlm.nih.gov/pmc/articles/PMC4756593>
161. Lutz SM, Cho MH, Hersh C, Castaldi P, McDonald ML, Regan EA, Mattheisen M, DeMeo D, Parker M, Foreman M, Make BJ, Jensen RL, Casaburi R, Lomas D, Bhatt SP, Bakke P, Gulsvik Amund, Crapo JD, Beaty TH, Laird N, Lange C, Hokanson JE, Silverman EK, ECLIPSE Investigators, COPDGene Investigators. A genome-wide association study identifies novel risk loci for spirometric measures among subjects of European and African ancestry. *BMC Genet* 2015; 16:138. PMID: 26634245 PMCID: 4668640  
<http://www.ncbi.nlm.nih.gov/pmc/articles/PMC4668640>
162. Begum F, Ruczinski I, Li S, Silverman EK, Cho MH, Lynch DA, Curran-Everat D, Crapo JD, Scharpf R, Parker M, Hetmanski J, Beaty TH. Identifying a deletion affecting total lung capacity among subjects in the COPDGene study cohort. *Genet Epidemiol*. 2016 Jan;40(1):81-8. PMID: 26643968 PMCID: 4679532  
<https://www.ncbi.nlm.nih.gov/pmc/articles/PMC4679532>
163. Qui W, Wan ES, Morrow J, Cho MH, Crapo JD, Silverman EK, DeMeo DL. The impact of genetic variation and cigarette smoke on DNA methylation in current and former smokers from the COPDGene study. *Epigenetics* 2015; 10(11):1064-1073. PMID: 26646902 PMCID: 4844199  
<http://www.ncbi.nlm.nih.gov/pmc/articles/PMC4844199>
164. Bhatt SP, Wells JM, Kinney G, Washko GR, Budoff M, Kim YI, Bailey W, Hokanson JE, Silverman EK, Crapo JD, Dransfield MT, for the COPDGene Investigators. Beta-blockers are associated with a reduction in COPD exacerbations. *Thorax* 2016 Jan; 71(1):8-14. PMID: 26283710 PMCID: 5154678  
<https://www.ncbi.nlm.nih.gov/pmc/articles/PMC5154678>
165. Zach JA, Williams A, Jou SS, Yagihashi K, Everett D, Hokanson JE, Stinson D, Lynch DA, COPDGene Investigators. Current smoking status is associated with lower quantitative CT measures of emphysema and gas trapping. *J Thorac Imaging* 2016 Jan; 31(1):29-36. PMID: 26429588 PMCID: 4677600  
<http://www.ncbi.nlm.nih.gov/pmc/articles/PMC4677600>
166. Chang Y, Glass K, Liu Y, Silverman EK, Crapo JD, Tal-Singer R, Bowler R, Dy J, Cho M, Castaldi P. COPD subtypes identified by network-based clustering of blood



- gene expression. *Genomics* 2016 Mar; 107(2-3):51-8. PMID: 26773458 PMCID: 4761317  
<https://www.ncbi.nlm.nih.gov/pmc/articles/PMC4761317>
167. Chen K, Hoffman EA, Seetharaman I, Jiao F, Lin CL, Chan KS. Linking lung airway structure to pulmonary function via composite bridge regression. *Ann Appl Stat* 2016 Dec; 10(4):1880-1906. PMID: 28280520 PMCID: 5340208  
<https://www.ncbi.nlm.nih.gov/pmc/articles/PMC5340208/>
168. Gallardo-Estrella L, Lynch DA, Prokop M, Stinson D, Zach J, Judy PF, Van Ginneken B, Van Rikxoort EM. Normalizing computed tomography data reconstructed with different filter kernels: effect on emphysema quantification. *Eur Radiol* 2016 Feb; 26(2):478-86. PMID: 26002132 PMCID: 4712239  
<https://www.ncbi.nlm.nih.gov/pmc/articles/PMC4712239>
169. Bhatt SP, Terry NL, Nath H, Zach JA, Tschirren J, Bolding MS, Stinson DS, Wilson CG, Curran-Everett D, Lynch DA, Putcha N, Soler X, Wise RA, Washko GR, Hoffman EA, Foreman MG, Dransfield MT. Association between expiratory central airway collapse and respiratory outcomes among smokers. *JAMA* 2016 Feb 2; 315(5):498-505. PMID: 26836732 PMCID: 5173387  
<https://www.ncbi.nlm.nih.gov/pmc/articles/PMC5173387>
170. Chan KS, Jiao F, Mikulski MA, Gerke A, Guo J, Newell JD Jr, Hoffman EA, Thompson B, Lee CH, Fuortes LJ. Novel logistic regression model of chest CT attenuation coefficient distributions for the automated detection of abnormal (emphysema or ILD) versus normal lung. *Acad Radiol* 2016 Mar; 23:304-14. PMID: 26776294 PMCID: 4744594  
<http://www.ncbi.nlm.nih.gov/pmc/articles/PMC4744594>
171. Vaz Fragoso CA, McAvay G, Van Ness PH, Casaburi R, Jensen RL, MacIntyre N, Yaggi HK, Gill TM, Concato J. Phenotype of spirometric impairment in an aging population. *Am J Respir Crit Care Med* 2016; 193(7):727-735. PMID: 26540012 PMCID: 4824933  
<https://www.ncbi.nlm.nih.gov/pmc/articles/PMC4824933>
172. Harmouche R, Ross JC, Diaz AA, Washko GR, Estepar RS. A robust emphysema severity measure based on disease subtypes. *Acad Radiol* 2016 Apr; 23(4):421-8. PMID: 26947221 PMCID: 4813794  
<https://www.ncbi.nlm.nih.gov/pmc/articles/PMC4813794>
173. Martinez CH, Diaz AA, Parulekar AD, Rennard SI, Kanner RE, Hansel NN, Couper D, Holm KE, Hoth KF, Curtis JL, Martinez FJ, Hanania NA, Regan EA, Paine R 3rd, Cigolle CT, Han MK, COPDGene and SPIROMICS Investigators. Age-related differences in health-related quality of life in COPD: an analysis of the COPDGene and SPIROMICS cohorts. *Chest* 2016 Apr; 149(4):927-35. PMID: 26836895 PMCID: 4944781  
<https://www.ncbi.nlm.nih.gov/pmc/articles/PMC4944781>
174. Vaz Fragoso C, McAvay G, Van Ness PH, Casaburi R, Jensen RL, MacIntyre N, Gill TM, Yaggi HK, Concato J. Phenotype of normal spirometry in an aging population. *Am J Respir Crit Care Med*. 2015 Oct 1;192(7):817-

25. PMID: 26114439 PMCID: 4613896  
<https://www.ncbi.nlm.nih.gov/pmc/articles/PMC4613896>
175. Putman RK, Hatabu H, Araki T, Gao W, Nishino M, Okajima Y, Dupuis J, Cho MH, Coxson HO, Celli BR, Fernandez IE, Zazueta OE, Ross JC, Harmouche R, San Jose Estepar R, Diaz AA, ECLIPSE, and COPDGene Investigators, Silverman EK, O'Connor GT, Washko GR, Rosas IO, Hunninghake GM. Association between interstitial lung abnormalities and all-cause mortality. *JAMA* 2016 Feb 16; 315(7):672-81 PMID: 26881370 PMCID: 4828973  
<http://www.ncbi.nlm.nih.gov/pmc/articles/PMC4828973>
176. Ouyang W, Dass C, Zhao H, Kim C, Criner G, COPDGene Investigators. Multiplanar MDCT measurement of esophageal hiatus surface area: association with hiatal hernia and GERD. *Surg Endosc* 2016 Jun; 30(6):2465-72. PMID: 26304104 PMCID: 4767697  
<https://www.ncbi.nlm.nih.gov/pmc/articles/PMC4767697>
177. Silver JS, Kearley J, Copenhaver AM, Sanden C, Mori M, Yu L, Pritchard GH, Berlin AA, Hunter CA, Bowler R, Erjefalt JS, Kolbeck R, Humbles AA. Inflammatory triggers associated with exacerbations of COPD orchestrate plasticity of group 2 innate lymphoid cells in the lungs. *Nat Immunol* 2016 Jun; 17(6):626-35. PMID: 27111143 PMCID: 5345745  
<https://www.ncbi.nlm.nih.gov/pmc/articles/PMC5345745>
178. Fingerlin T, Zhang W; Yang I, Ainsworth HC, Russell PH, Blumhagen RZ, Schwarz MI, Brown KK, Steele MP, Loyd JE, Cosgrove GP, Lynch D, Groshong S, Collard HR, Wolters PJ, Bradford WZ, Kossen K, Seiwert SD, du Bois RM, Garcia CK, Devine MS, Gudmundsson G, Isaksson HJ, Kaminski N, Zhang Y, Gibson KF, Lancaster LH, Maher TM; Molyneaux PL, Wells AU, Moffatt MF, Selman M, Pardo A, Kim DS, Crapo JD, Make BJ, Regan EA, Walek DS, Daniel JJ, Kamatani Y, Zelenika D, Murphy E, Smith K, McKean D, Pedersen BS, Talbert J, Powers J, Markin CR, Beckman KB, Lathrop M, Freed B, Langefeld CD, Schwartz DA. Genome-wide imputation study identifies novel HLA locus for pulmonary fibrosis and potential role for auto-immunity in fibrotic idiopathic interstitial pneumonia. *BMC Genetics* 2016 Jun 7; 17(1):74. PMID: 27266705 PMCID: 4895966  
<http://www.ncbi.nlm.nih.gov/pmc/articles/PMC4895966>
179. Lu Q, Jin C, Sun J, Bowler RP, Kechris K, Kaminski N, Zhao H. Post-GWAS prioritization through data integration provides novel insights on chronic obstructive pulmonary disease. *Stat Biosci* 2016 Jun 13; 2016:1-17 [Epub]. PMID: 27812370 PMCID: 5087812  
<https://www.ncbi.nlm.nih.gov/pmc/articles/PMC5087812>
180. Qiao D, Lange C, Beaty TH, Crapo JD, Barnes KC, Bamshad M, Hersh CP, Morrow J, Pinto-Plata VM, Marchetti N, Bueno R, Celli BR, Criner GJ, Silverman EK, Cho MH, LungGO, COPDGene Investigators, NHLBI Exome Sequencing Project. Exome sequencing analysis in severe, early-onset chronic obstructive pulmonary disease. *Am J Respir Crit Care Med* 2016 Jun 15; 193(12):1353-63. PMID: 26736064 PMCID: 4910887  
<https://www.ncbi.nlm.nih.gov/pmc/articles/PMC4910887>

181. McGeachie MJ, Yates KP, Zhou X, Guo F, Sternberg AL, Van Natta ML, Wise RA, Szeffler SJ, Sharma S, Kho AT, Cho MH, Croteau-Chonka DC, Castaldi PJ, Jain G, Sanyal A, Zhan Y, Lajoie BR, Dekker J, Stamatoyannopoulos J, Covar RA, Zeiger RS, Adkinson NF, Williams PV, Kelly HW, Grasemann H, Vonk JM, Koppelman GH, Postma DS, Raby BA, Houston I, Lu Q, Fuhlbrigge AL, Tantisira KG, Silverman EK, Tonascia J, Strunk RC, Weiss ST; CAMP Research Group. Genetics and genomics of longitudinal lung function patterns in individuals with asthma. *Am J Respir Crit Care Med* 2016 Dec 15; 194(12):1465-1474. PMID: 27367781 PMCID: 5215031  
<https://www.ncbi.nlm.nih.gov/pmc/articles/PMC5215031>
182. Hobbs BD, Parker MM, Chen H, Lao T, Hardin M, Qiao D, Hawrylkiewicz I, Sliwinski P, Yim JJ, Kim WJ, Kim DK, Castaldi PJ, Hersh CP, Morrow J, Celli BR, Pinto-Plata VM, Criner GJ, Marchetti N, Bueno R, Agusti A, Make BJ, Crapo JD, Calverley PM, Donner CF, Lomas DA, Wouters EF, Vestbo J, Paré PD, Levy RD, Rennard SI, Zhou X, Laird NM, Lin X, Beaty TH, Silverman EK, Cho MH; NETT Genetics, ECLIPSE, COPDGene and International COPD Genetics Network Investigators. Exome array analysis identifies a common variant in IL27 associated with chronic obstructive pulmonary disease. *Am J Respir Crit Care Med* 2016 Jul 1; 194(1):48-57. PMID: 26771213 PMCID: 4960630  
<https://www.ncbi.nlm.nih.gov/pmc/articles/PMC4960630>
183. Krachman SL, Tiwari R, Vega ME, Yu D, Soler X, Jaffe F, Kim V, Swift I, D'Alonzo GE, Criner GJ, COPDGene Investigators. Effect of emphysema severity on the apnea-hypopnea index in smokers with obstructive sleep apnea. *Ann Am Thorac Soc* 2016 Jul; 13(7):1129-35. PMID: 27078132 PMCID: 5015748  
<https://www.ncbi.nlm.nih.gov/pmc/articles/PMC5015748>
184. Kim V, Zhao H, Boriak A, Anzueto A, Soler X, Bhatt SP, Rennard SI, Wise R, Comellas A, Ramsdell JW, Kinney GL, Han MK, Martinez CH, Yen A, Black-Shinn J, Porszasz J, Criner GJ, Hanania NA, Sharafkhaneh A, Crapo JD, Make BJ, Silverman EK, Curtis JL, COPDGene Investigators. Persistent and newly developed chronic bronchitis are associated with worse outcomes in chronic obstructive pulmonary disease. *Ann Am Thorac Soc* 2016 July 1; 13(7):1016-25. PMID: 27158740 PMCID: 5015750  
<https://www.ncbi.nlm.nih.gov/pmc/articles/PMC5015750>
185. Bhatt SP, Soler X, Wang X, Murray S, Anzueto AR, Beaty TH, Boriak AM, Casaburi R, Criner GJ, Diaz AA, Dransfield MT, Curran-Everett D, Galbán CJ, Hoffman EA, Hogg JC, Kazerooni EA, Kim V, Kinney GL, Lagstein A, Lynch DA, Make BJ, Martinez FJ, Ramsdell JW, Reddy R, Ross BD, Rossiter HB, Steiner RM, Strand MJ, van Beek EJ, Wan ES, Washko GR, Wells JM, Wendt CH, Wise RA, Silverman EK, Crapo JD, Bowler RP, Han MK; COPDGene Investigators. Association between functional small airway disease and FEV1 decline in chronic obstructive pulmonary disease. *Am J Respir Crit Care Med* 2016 July 15; 194(2):178-84. PMID: 26808615 PMCID: 5003216  
<https://www.ncbi.nlm.nih.gov/pmc/articles/PMC5003216>
186. Dilektakli AG, Porszasz J, Casaburi R, Stringer RR, Bhatt SP, Pak Y, Rossiter HB, Washko GR, Castaldi P, San Jose Estepar E, Hansen JE, and COPDGene Investigators. A novel spirometric measure identifies mild chronic obstructive pulmonary disease unidentified by standard criteria. *Chest*. 2016 Jul

21. PMID: 27452770 PMCID: 5103018  
<https://www.ncbi.nlm.nih.gov/pmc/articles/PMC5103018>
187. Yip WK, Bonetti M, Cole BF, Barcella W, Wang XV, Lazar A, Gelber RD. Subpopulation treatment effect pattern plot (STEPP) analysis for continuous, binary, and count outcomes. *Clin Trials* 2016 Aug; 13(4):382-90. PMID: 27094489 PMCID: 4942365  
<https://www.ncbi.nlm.nih.gov/pmc/articles/PMC4942365>
188. Silverman EK. Risk of lung disease in PI MZ heterozygotes: current status and future directions. *Ann Am Thorac Soc* 2016 Aug; 13 Suppl 4:S341-5. PMID: 27564671 PMCID: 5059493  
<https://www.ncbi.nlm.nih.gov/pmc/articles/PMC5059493>
189. Hardin M, Cho MH, McDonald M, Wan E, Lomas DA, Coxson HO, Edwards LD, MacNee W, Vestbo J, Yates JC, Agusti A, Calverley PMA, Celli B, Crim C, Rennard S, Wouters E, Bakke P, Regan EA, Make BJ, Litonjua A, Hokanson JE, Crapo HJD, Beaty TH, Silverman EK, Hersh CP, the ECLIPSE and COPDGene Investigators. A genome-wide analysis of the response to inhaled  $\beta$ 2-agonists in chronic obstructive pulmonary disease. *Pharmacogenomics J* 2016 Aug; 16(4):326-35. PMID: 26503814 PMCID: 4848212  
<https://www.ncbi.nlm.nih.gov/pmc/articles/PMC4848212>
190. Sun W, Kechris K, Jacobson S, Haekins GA, Yang J, Chen T, Quibrebra P, Anderson W, Barr RG, Basta PV, Bleecker ER, Beaty T, Castaldi P, Cho MH, Demeo D, Christenson SA, Couper DJ, Curtis JL, Doerschuk CM, Drummond MB, Freeman CM, Goukova NA, Han MK, Hansel NN, Hersh CP, Hoffman EA, Kaner RJ, Kanner RE, Kleerup EC, Lutz S, Martinez FJ, Meyers DA, Peters SP, Regan EA, Silverman EK, Crapo JD, Rennard SI, Scholand MB, Woodruff PG, O'Neal WK, Bowler RP, for the SPIROMICS Research Group and COPDGene Investigators. Common genetic polymorphisms influence blood biomarker associations in COPD. *PLoS Genet* 2016 Aug 17; 12(8):e1006011. PMID: 27532455 PMCID: 4988740  
<https://www.ncbi.nlm.nih.gov/pmc/articles/PMC4988780>
191. Morrow JD, Cho MH, Hersh CP, Pinto-Plata V, Celli B, Marchetti N, Criner G, Bueno R, Washko G, Glass K, Choi AM, Quackenbush J, Silverman EK, DeMeo DL. DNA methylation profiling in human lung tissue identifies genes associated with COPD. *Epigenetics* 2016 Oct; 11(10):730-739. PMID: 27564456 PMCID: 5094634  
<https://www.ncbi.nlm.nih.gov/pmc/articles/PMC5094634>
192. Cosentino J, Zhao H, Hardin M, Hersh CP, Crapo JD, Kim V, Criner GJ, and the COPDGene Investigators. Analysis of asthma-chronic obstructive pulmonary disease overlap syndrome defined on the basis of bronchodilator response and degree of emphysema. *Ann Am Thorac Soc* 2016 Sept 1; 13(9):1483-89. PMID: 27268723 PMCID: 5614769  
<https://www.ncbi.nlm.nih.gov/pmc/articles/PMC5614769>
193. Rahaghi FN, Wells JM, Come CE, De La Bruere IA, Bhatt SP, Ross JC, Vegas-Sánchez-Ferrero G, Diaz AA, Minhas J, Dransfield MT, San José Estépar R, Washko GR; and the COPDGene Investigators. Arterial and venous pulmonary vascular morphology and their relationship to findings in cardiac magnetic resonance imaging in

- smokers. *J Comput Assist Tomogr* 2016 Sep 16. PMID: 27636250 PMCID: 5110399  
<https://www.ncbi.nlm.nih.gov/pmc/articles/PMC5110399>
194. Bhatt SP, Bodduluri D, Newell JD, Hoffman EA, Sieren JC, Han MK, Dransfield MT, Reinhardt JM, COPDGene Investigators. CT-derived biomechanical metrics improve agreement between spirometry and emphysema. *Acad Radiol* 2016 Oct; 23(10):1255-63. PMID: 27055745 PMCID: 5026854  
<https://www.ncbi.nlm.nih.gov/pmc/articles/PMC5026854>
195. Binder P, Batmanghelich NK, Estepar RS, Golland P. Unsupervised discovery of emphysema subtypes in a large clinical cohort. *Mach Learn Med Imaging* 2016 Oct; 10019:180-187. PMID: 28232959 PMCID: 5317320  
<https://www.ncbi.nlm.nih.gov/pmc/articles/PMC5317320/>
196. Kinney GL, Baker EH, Klein OL, Black-Shinn JL, Wan ES, Make B, Regan E, Bowler RP, Lutz SM, Young KA, Duca LM, Washko GR, Silverman EK, Crapo JD, Hokanson JE. Pulmonary predictors of incident diabetes in smokers. *Chronic Obstr Pulm Dis* 2016 Oct; 3(4):739-47. PMID: 27795984 PMCID: 5084840  
<https://www.ncbi.nlm.nih.gov/pmc/articles/PMC5084840>
197. Begum F, Ruczinski I, Hokanson JE, Lutz SM, Parker MM, Cho MH, Hetmanski JB, Scharpf RB, Crapo JD, Silverman EK, Beaty TH on behalf of the COPDGene Investigators. Hemizygous deletion on chromosome 3p26.1 is associated with heavy smoking among African American subjects in the COPDGene study. *PLoS One* 2016 Oct 6; 11(10):e0164134. PMID: 27711239 PMCID: 5053531  
<https://www.ncbi.nlm.nih.gov/pmc/articles/PMC5053531>
198. Mathias RA, Taub MA, Gignoux CR, Fu W, Musharoff S, O'Connor TD, Vergara C, Torgerson DG, Pino-Yanes M, Shringarpure SS, Huang L, Rafaels N, Boorgula MP, Johnston HR, Ortega VE, Levin AM, Song W, Torres R, Padhukasahasram B, Eng C, Mejia-Mejia DA, Ferguson T, Qin ZS, Scott AF, Yazdanbakhsh M, Wilson JG, Marrugo J, Lange LA, Kumar R, Avila PC, Williams LK, Watson H, Ware LB, Olopade C, Olopade O, Oliveira R, Ober C, Nicolae DL, Meyers D, Mayorga A, Knight-Madden J, Hartert T, Hansel NN, Foreman MG, Ford JG, Faruque MU, Dunston GM, Caraballo L, Burchard EG, Bleecker E, Araujo MI, Herrera-Paz EF, Gietzen K, Grus WE, Bamshad M, Bustamante CD, Kenny EE, Hernandez RD, Beaty TH, Ruczinski I, Akey J; CAAPA, Barnes KC. A continuum of admixture in the Western Hemisphere revealed by the African Diaspora genome. *Nat Commun* 2016 Oct 11; 7:12522. PMID: 27725671 PMCID: 5062574  
<https://www.ncbi.nlm.nih.gov/pmc/articles/PMC5062574>
199. Kessler MD, Yerges-Armstrong L, Taub MA, Shetty AC, Maloney K, Jeng LJ, Ruczinski I, Levin AM, Williams LK, Beaty TH, Mathias RA, Barnes KC; Consortium on Asthma among African-ancestry Populations in the Americas (CAAPA), O'Connor TD. Challenges and disparities in the application of personalized genomic medicine to populations with African ancestry. *Nat Commun* 2016 Oct 11; 7:12521. PMID: 27725664 PMCID: 5062569  
<https://www.ncbi.nlm.nih.gov/pmc/articles/PMC5062569>
200. Ginsberg SB, Zhao J, Humphries S, Yagihashi K, Lynch DA, Schroeder JD, and the COPDGene Investigators. Texture-based quantification of centrilobular emphysema



and centrilobular nodularity in longitudinal CT scans of current and former smokers. *Acad Radiol* 2016 Nov; 23(11):1349-1358. PMID: 27575837 PMCID: 5096977

<https://www.ncbi.nlm.nih.gov/pmc/articles/PMC5096977>

201. Rahagi FN, Wells JM, Come CE, De La Bruere IA, Bhatt SP, Ross JC, Vegas-Sánchez-Ferrero G, Diaz AA, Minhas J, Dransfield MT, San José Estépar R, Washko GR; and the COPDGene Investigators. Arterial and venous pulmonary vascular morphology and their relationship to findings in cardiac magnetic resonance imaging in smokers. *J Comput Assist Tomogr* 2016 Nov/Dec; 40(6):948-952. PMID: 27636250 PMCID: 5110399  
<https://www.ncbi.nlm.nih.gov/pmc/articles/PMC5110399/>
202. Dilektasli AG, Porszasz J, Casaburi R, Stringer WW, Bhatt SP, Pak Y, Rossiter HB, Washko G, Castaldi PJ, San Jose Estepar R, Hansen JE; COPDGene Investigators. A novel spirometric measure identifies mild chronic obstructive pulmonary disease unidentified by standard criteria. *Chest* 2016 Nov; 150(5):1080-90. PMID: 27452770 PMCID: 5103018  
<https://www.ncbi.nlm.nih.gov/pmc/articles/PMC5103018/>
203. Nambu A, Zach J, Schroeder J, Jin G, Kim SS, Kim YI, Schnell C, Bowler R, Lynch DA. Quantitative computed tomography measurements to evaluate airway disease in chronic obstructive pulmonary disease: Relationship to physiologic measurements, clinical index and visual assessment of airway disease. *Eur J Radiol* 2016 Nov; 85(11):2144-55. PMID: 27776670 PMCID: 5310933  
<https://www.ncbi.nlm.nih.gov/pmc/articles/PMC5310933>
204. Wells J., Estepar Raul, McDonald Merry-Lynn, Bhatt Surya, Diaz Alejandro, Bailey William, Jacobson Francine, Dransfield Mark, Washko George, Make Barry, Casaburi Richard, van Beek Edwin, Hoffman Eric, Sciruba Frank, Crapo James, Silverman Edwin, Hersh Craig, the COPDGene Investigators. Clinical, physiologic, and radiographic factors contributing to development of hypoxemia in moderate to severe COPD: a cohort study. *BMC Pulmonary Medicine* 2016, 16:169 PMID: 27903260 PMCID: 5131397  
<https://www.ncbi.nlm.nih.gov/pmc/articles/PMC5131397>
205. Lambert AA, Putcha N, Drummond MB, Boriek AM, Hanania NA, Kim V, Kinney GL, McDonald MN, Brigham EP, Wise RA, McCormack C, Hansel NN; COPDGene Investigators. Obesity is associated with increased morbidity in moderate to severe COPD. *Chest* 2017 Jan; 151(1):68-77. PMID: 27568229 PMCID: 5310126  
<https://www.ncbi.nlm.nih.gov/pmc/articles/PMC5310126>
206. Halper-Stromberg E, Cho MH, Wilson C, Nevrekar D, Crapo JD, Washko G, San Jose Estepar R, Lynch DA, Silverman EK, Leach S, Castaldi PJ. Visual assessment of chest CT images is independently useful for genetic association analysis in studies of chronic obstructive pulmonary disease. *Ann Am Thorac Soc* 2017 Jan 1; 14(1):33-40. PMID: 27739898 PMCID: 5291477  
<https://www.ncbi.nlm.nih.gov/pubmed/27739898>
207. Diaz AA, Young TP, Maselli DJ, Martinez CH, Maclean ES, Yen A, Dass C, Simpson SA, Lynch DA, Kinney GL, Hokanson JE, Washko GR, San José Estépar

- R. Bronchoarterial ratio in never-smoker adults: implications for bronchial dilation definition. *Respirology* 2017 Jan; 22(1):108-113. PMID: 27538197 PMCID: 5161710  
<https://www.ncbi.nlm.nih.gov/pmc/articles/PMC5161710>
208. Adami A, Cao R, Porszasz J, Casaburi R, Rossiter HB. Reproducibility of NIRS assessment of muscle oxidative capacity in smokers with and without COPD. *Respir Physiol Neurobiol* 2017 Jan; 235:18-26. PMID: 27659351 PMCID: 5136338  
<https://www.ncbi.nlm.nih.gov/pmc/articles/PMC5136338>
209. Hayden LP, Cho MH, McDonald MN, Crapo JD, Beaty TH, Silverman EK, Hersh CP. Susceptibility to childhood pneumonia: A genome wide analysis. *Am J Respir Cell Mol Biol* 2017 Jan; 56(1):20-28. PMID: 27508494 PMCID: 5248961  
<https://www.ncbi.nlm.nih.gov/pmc/articles/PMC5248961>
210. Lutz SM, Fingerlin TE, Hokanson JE, Lange C. A general approach to testing for pleiotropy with rare and common variants. *Genet Epidemiol* 2017 Feb; 41(2):163-170. PMID: 27900789 PMCID: 5472207  
<https://www.ncbi.nlm.nih.gov/pmc/articles/PMC5472207>
211. Ross JC, Castaldi PJ, Cho MH, Chen J, Chang Y, Dy JG, Silverman EK, Washko GR, Jose Estepar RS. A Bayesian nonparametric model for disease subtyping: application to emphysema phenotypes. *IEEE Trans Med Imaging* 2017 Jan; 36(1):343-354. PMID: 28060702 PMCID: 5267575  
<https://www.ncbi.nlm.nih.gov/pmc/articles/PMC5267575>
212. Dransfield MT, Kunisaki KM, Strand MJ, Anzueto A, Bhatt SP, Bowler RP, Criner CJ, Curtis JL, Hanania NA, Nath H, Putcha N, Roark SE, Wan ES, Washko GR, Wells JM, Wendth CH, Make BJ, for the COPDGene Investigators. Acute exacerbations and lung function loss in smokers with and without COPD. *Am J Respir Crit Care Med* 2017 Feb 1; 195(3):324-330 PMID: 27556408 PMCID: 5328181  
<http://www.ncbi.nlm.nih.gov/pubmed/27556408> (abstract)
213. Llinares-Lopez F, Papaxanthos L, Bodenham D, Roqueiro D, COPDGene Investigators, Borgwardt K. Genome-wide genetic heterogeneity discovery with categorical covariates. *Bioinformatics*. 2017 Feb 14. doi: 10.1093/bioinformatics/btx071. [Epub ahead of print] PMID: PMCID:
214. Keene JD, Jacobson S, Kechris K, Kinney GL, Foreman MG, Doerschuk CM, Make BJ, Curtis JE, Rennard SI, Barr RG, Bleecker ER, Kanner RE, Kleeerup EC, Hansel NN, Woodruff PG, Han MK, Paine III R, Martinez FJ, Bowler RP, O'Neal WK for COPDGene and SPIROMICS Investigators. Biomarkers predictive of exacerbations in the SPIROMICS and COPDGene cohorts. *Am J Respir Crit Care Med* 2017 Feb 15; 195(4):473-481 PMID: 27579823 PMCID: 5378424  
<https://www.ncbi.nlm.nih.gov/pmc/articles/PMC5378424/>
215. Martinez CH, Diaz AA, Meldrum C, Curtis JL, Cooper CB, Pirozzi C, Kanner RE, Paine R, Woodruff PG, Bleecker ER, Hansel NH, Barr RG, Marchetti N, Criner GJ, Kazerooni EA, Hoffman EA, Ross BD, Galban CJ, Cigolle CT, Martinez FJ, Han MK. Age and small airway imaging abnormalities in subjects with and without airflow obstruction in SPIROMICS. *Am J Respir Crit Care Med* 2017 Feb 15; 195(4):464-472. PMID: 27564413 PMCID: 5378423  
<https://www.ncbi.nlm.nih.gov/pmc/articles/PMC5378423/>

216. Martinez CH, Freeman CM, Nelson JD, Murray S, Wang X, Budoff MJ, Dransfield MT, Hokanson JE, Kazerooni EA, Kinney GL, Martinez FJ, Regan EA, Wells JM, Han MK, Curtis JL, COPDGene Investigators. GDF-15 plasma levels in chronic obstructive pulmonary disease are associated with subclinical coronary artery disease. *Respir Res* 2017 Feb 28; 18(1):42. PMID: 28245821 PMCID: 5331711 <https://www.ncbi.nlm.nih.gov/pmc/articles/PMC5331711>
217. Hobbs BD, de Jong K, Lamontagne M, Bossé Y, Shrine NRG, Artigas MS, Wain KV, Hall IP, Wyss AB, London SJ, North KE, Franceschini N, Strachan DP, Beaty TH, Hokanson JE, Crapo JD, Castaldi PJ, Chase RP, Bartz TM, Heckbert SR, Psaty BM, Gharib SA, Zanen P, Wijmenga C, De Jong PA, Locantore N, Tal-Singer T, Rennard SI, Timens W, Paré PD, Latourelle JC, Dupuis J, O'Connor GT, Wilk J, Kim WJ, Lee MK, Oh Y, Vonk JM, Leng S, Belinsky SA, Tesfaigzi Y, Manichaikul A, Wang X, Rich SS, Barr RG, Sparrow D, Litonjua AL, Bakke P, Gulsvik A, Lahousse L, Brusselle GG, Stricker BH, Uitterlinden AG, Ampleford EJ, Bleecker ER, Woodruff PG, Meyers DA, Lomas DA, Yim JJ, Kim DK, Hawrylkiewicz I, Sliwinski P, Hardin M, Postma DS, MacNee W, Tobin MD, Silverman EK, Boezen HM, Cho MH, COPDGene Investigators, ECLIPSE Investigators, SPIROMICS Research Group, International COPD Genetics Network Investigators, UK BiLEVE Investigators, International COPD Genetics Consortium. Genetic loci associated with chronic obstructive pulmonary disease overlap with loci for lung function and pulmonary fibrosis. *Nat Genet* 2017 Mar; 49(3):426-432. PMID: 28166215 PMCID: 5381275 <https://www.ncbi.nlm.nih.gov/pmc/articles/PMC5381275>
218. Morrow JD, Zhou X, Lao T, Jiang Z, DeMeo DL, Cho MH, Qiu W, Cloonan S, Pinto-Plata V, Celli B, Marchetti N, Criner GJ, Bueno R, Washko GR, Glass K, Quackenbush J, Choi AM, Silverman EK, Hersh CP. Functional interactors of three genome-wide association study genes are differentially expressed in severe chronic obstructive pulmonary disease lung tissue. *Sci Rep* 2017 Mar 13; 7:44232. PMID: 28287180 PMCID: 5347019 <https://www.ncbi.nlm.nih.gov/pmc/articles/PMC5347019>
219. Hardin ME, Cho MH, Sharma SS, Glass K, Castaldi PJ, McDonald ML, Aschard H, Senter-Sylvia J, Tantisira K, Weiss ST, Hersh CP, Morrow JD, Lomas D, Agusti A, Bakke P, Gulsvik A, O'Connor GT, Dupuis J, Hokanson J, Crapo J, Beaty TH, Laird N, Silverman EK, DeMeo DL and the COPDGene and ECLIPSE Investigators. Sex-based genetic association study identifies CELSR1 as a possible COPD risk locus among women. *Am J Respir Cell Mol Biol* 2017 Mar; 56(3):332-341. PMID: 27854507 PMCID: 5359539 <https://www.ncbi.nlm.nih.gov/pmc/articles/PMC5359539/>
220. Boueiz A, Lutz SM, Cho MH, Hersh CP, Bowler RP, Washko GR, Halper-Stromberg E, Bakke P, Gulsvik A, Laird NM, Beaty TH, Coxson HO, Crapo JD, Silverman EK, Castaldi PJ, DeMeo DL, for the COPDGene and ECLIPSE Investigators. Genome-wide association study of the genetic determinants of emphysema distribution. *Am J Respir Crit Care Med* 2017 Mar 15; 195(6):757-71. PMID: 27669027 PMCID: 5363968 <https://www.ncbi.nlm.nih.gov/pmc/articles/PMC5363968/>



221. Martinez FJ, Mannino D, Leidy NK, Malley KG, Bacci ED, Barr RG, Bowler RP, Han MK, Houfek JF, Make B, Meldrum CA, Rennard S, Thomashow B, Walsh J, Yawn BP; High-Risk-COPD Screening Study Group. A new approach for identifying patients with undiagnosed chronic obstructive pulmonary disease. *Am J Respir Crit Care Med* 2017 Mar 15; 195(6):748-756. PMID: 27783539 PMCID: 5363964  
<https://www.ncbi.nlm.nih.gov/pmc/articles/PMC5363964/>
222. Washko GR, Kinney G, Ross JC, San Jose R, Han MK, Dransfield MT, Kim V, Hatabu H, Come CE, Bowler RP, Silverman EK, Crapo JD, Lynch DA, Hokanson JE, Diaz AA, for the COPDGene Investigators. Lung mass in smokers. *Acad Radiol* 2017 Apr; 24(4):386-392. PMID: 27940230 PMCID: 5600161  
<https://www.ncbi.nlm.nih.gov/pmc/articles/PMC5600161/>
223. Melroy-Greif WE, Simonson MA, Corley RP, Lutz SM, Hokanson JE, Ehringer MA. Examination of the Involvement of Cholinergic-Associated Genes in Nicotine Behaviors in European and African Americans. *Nicotine Tob Res* 2017 Apr 1; 19(4):417-425. PMID: 27613895 PMCID: 5868095  
<https://www.ncbi.nlm.nih.gov/pmc/articles/PMC5868095/>
224. Hodgson S, Griffin T, Reilly C, Harvey S, Witthuhn B, Sandri B, Kunisaki KM, Wendt CH. Plasma sphingolipids in HIV-associated chronic obstructive pulmonary disease. *BMJ Open Respir Res* 2017 Apr 3; 4(1):e000180. PMID: 28409005 PMCID: 5387954  
[https://www.ncbi.nlm.nih.gov/pmc/articles/PMC5387954](https://www.ncbi.nlm.nih.gov/pmc/articles/PMC5387954/)
225. Westney G, Foreman MG, Xu J, Henriques King M, Flenaugh E, Rust G. Impact of comorbidities among Medicaid enrollees with chronic obstructive pulmonary disease, United States, 2009. *Prev Chronic Dis* 2017 Apr 13; 14:E31. PMID: 28409741 PMCID: 5392445  
[https://www.ncbi.nlm.nih.gov/pmc/articles/PMC5392445](https://www.ncbi.nlm.nih.gov/pmc/articles/PMC5392445/)
226. Farahi N, Paige E, Balla J, Prudence E, Ferreira RC, Southwood M, Appleby SL, Bakke P, Gulsvik A, Litonjua AA, Sparrow D, Silverman EK, Cho MH, Danesh J, Paul DS, Freitag DF, Chilvers ER. Neutrophil-mediated IL-6 receptor trans-signaling and the risk of chronic obstructive pulmonary disease and asthma. *Hum Mol Genet* 2017 Apr 15; 26(8):1584-1596. PMID: 28334838 PMCID: 5393150  
[https://www.ncbi.nlm.nih.gov/pmc/articles/PMC5393150](https://www.ncbi.nlm.nih.gov/pmc/articles/PMC5393150/)
227. Johnston HR, Hu YJ, Gao J, O'Connor TD, Abecasis GR, Wojcik GL, Gignoux CR, Gourraud PA, Lizee A, Hansen M, Genuario R, Bullis D, Lawley C, Kenny EE, Bustamante C, Beaty TH, Mathias RA, Barnes KC, Qin ZS; CAAPA Consortium. Identifying tagging SNPs for African specific genetic variation from the African Diaspora Genome. *Sci Rep* 2017 Apr 21; 7:46398. PMID: 28429804 PMCID: 5399604  
[https://www.ncbi.nlm.nih.gov/pmc/articles/PMC5399604](https://www.ncbi.nlm.nih.gov/pmc/articles/PMC5399604/)
228. Loehlein Fier H, Prokopenko D, Hecker J, Cho MH, Silverman EK, Weiss ST, Tanzi RE, Lange C. On the association analysis of genome-sequencing data: A spatial clustering approach for partitioning the entire genome into nonoverlapping windows. *Genet Epidemiol* 2017 May; 41(4):332-

340. PMID: 28318110 PMCID: 5525021  
<https://www.ncbi.nlm.nih.gov/pmc/articles/PMC5525021>
229. Manichaikul A, Sun L, Borczuk AC, Onengut-Gumuscu S, Farber EA, Mathai SK, Zhang W, Raghu G, Kaufman JD, Hinckley-Stukovsky KD, Kawut SM, Jelic S, Liu W, Fingerlin TE, Schwartz DA, Sell JL, Rich SS, Barr RG, Lederer DJ. Plasma soluble receptor for advanced glycation end products in idiopathic pulmonary fibrosis. *Ann Am Thorac Soc* 2017 May; 14(5):628-635. PMID: 28248552 PMCID: 5427736  
<https://www.ncbi.nlm.nih.gov/pmc/articles/PMC5427736/>
230. Qiao D, Lange C, Laird NM, Won S, Hersh CP, Morrow J, Hobbs B, Lutz SM, Ruczinski I, Beaty TH, Silverman EK, Cho MH. Gene-based segregation method for identifying rare variants in family-based sequencing studies. *Genet Epidemiol* 2017 May; 41(4):309-319. PMID: 28191685 PMCID: 5397337  
<https://www.ncbi.nlm.nih.gov/pmc/articles/PMC5397337/>
231. Bodduluri S, Bhatt SP, Hoffman EA, Newell JD Jr, Martinez CH, Dransfield MT, Han MK, Reinhardt JM, for the COPDGene Investigators. Biomechanical CT metrics are associated with patient outcomes in COPD. *Thorax* 2017 May; 72(5):409-414. PMID: 28044005 PMCID: 5526353  
<https://www.ncbi.nlm.nih.gov/pmc/articles/PMC5526353/>
232. Rahaghi FN, Sánchez-Ferrero GV, Minhas JK, Come CE, De La Bruere I, Wells JM, González-Serrano G, Bhatt SP, Fenster BE, Diaz AA, Kohli P, Ross JC, Lynch DE, Dransfield MT, Bowler RP, Ledesma-Carbayo MJ, San José Estépar R, Washko GR, COPDGene Investigators. Ventricular geometry from non-contrast non-ECG-gated CT scans: an imaging marker of cardiopulmonary disease in smokers. *Acad Radiol* 2017 May; 24(5):594-602. PMID: 28215632 PMCID: 5653289  
<https://www.ncbi.nlm.nih.gov/pmc/articles/PMC5653289/>
233. Schabdach J, Wells WM, Cho M, Batmanghelich KN. A likelihood-free approach for characterizing heterogenous diseases and large-scale studies. *Inf Process Med Imaging* 2017 Jun; 10265:170-183. PMID: 29129964 PMCID: 5462827  
<https://www.ncbi.nlm.nih.gov/pmc/articles/PMC5679301/>
234. Diaz AA, Young TP, Maselli DJ, Martinez CH, Gill R, Nardelli P, Wang W, Kinney GL, Hokanson JE, Washko GR, San Jose Estepar R. Quantitative CT measures of bronchiectasis in smokers. *Chest* 2017; 161(6):1255-1262. PMID: 27890712 PMCID: 5989641  
<https://www.ncbi.nlm.nih.gov/pmc/articles/PMC5989641/>
235. Hoff BA, Pompe E, Galbán S, Postma DS, Lammers JJ, Ten Hacken NHT, Koenderman L, Johnson TD, Verleden SE, de Jong PA, Mohamed Hoesein FAA, van den Berge M, Ross BD, Galbán CJ. CT-based local distribution metric improves characterization of COPD. *Sci Rep* 2017 Jun 7; 7(1):2999. PMID: 28592874 PMCID: 5462827  
<https://www.ncbi.nlm.nih.gov/pmc/articles/PMC5462827/>
236. Yun JH, Morrow J, Owen CA, Qiu W, Glass K, Lao T, Jiang Z, Perrella M, Silverman EK, Zhou X, Hersh CP. Transcriptomic analysis of lung tissue from cigarette smoke induced emphysema murine models and human COPD show shared and distinct pathways. *Am J Respir Cell Mol Biol* 2017 Jul; 57(1):47-

58. PMID: 28248572 PMCID: 5516276  
<https://www.ncbi.nlm.nih.gov/pmc/articles/PMC5516276/>
237. Gallardo Estrella L, Pompe E, Kuhnigk JM, Lynch DA, Bhatt SP, van Ginneken B, van Rikxoort EM. Computed tomography quantification of tracheal abnormalities in COPD and their influence on airflow limitation. *Med Phys* 2017 Jul; 44(7):3594-3603. PMID: 28423189 PMCID: 6052793  
<https://www.ncbi.nlm.nih.gov/pmc/articles/PMC6052793/>
238. Busch R, Hobbs BD, Zhou J, Castaldi PJ, McGeachie MJ, Hardin ME, Hawrylkiewicz I, Sliwinski P, Yim JJ, Kim WJ, Kim DK, Agusti A, Make BJ, Crapo JD, Calverley PM, Donner CF, Lomas DA, Wouters EF, Vestbo J, Tal-Singer R, Bakke P, Gulsvik A, Litonjua AA, Sparrow D, Paré PD, Levy RD, Rennard SI, Beaty TH, Hokanson J, Silverman EK, and Cho MH, for the NETT Genetics, ECLIPSE, ICGN, and COPDGene Investigators. Genetic association and risk scores in a COPD meta-analysis of 16,707 subjects. *Am J Respir Crit Mol Biol* 2017 Jul; 57(1):35-46. PMID: 28170284 PMCID: 5516277  
<https://www.ncbi.nlm.nih.gov/pmc/articles/PMC5516277/>
239. Lutz SM, Thwing A, Schmiege S, Kroehl M, Baker C, Starling A, Hokanson JE, Ghosh D. Examining the role of unmeasured confounding in mediation analysis with genetic and genomic applications. *BMC Bioinformatics* 2017 Jul 19; 18(1):344. PMID: 28724417 PMCID: 5517807  
<https://www.ncbi.nlm.nih.gov/pmc/articles/PMC5517807/>
240. Ash SY, Harmouche R, Ross JC, Diaz AA, Hunninghake GM, Putman RK, Onieva J, Martinez FJ, Choi AM, Lynch DA, Hatabu H, Rosas IO, Estepar RS, Washko GR. The objective identification and quantification of interstitial lung abnormalities in smokers. *Acad Radiol* 2017 Aug; 24(8):941-946. PMID: 27989445 PMCID: 5472510  
<https://www.ncbi.nlm.nih.gov/pmc/articles/PMC5472510/>
241. Foreman MG, Wilson C, DeMeo DL, Hersh CP, Beaty TH, Cho MH, Ziniti J, Curran-Everett D, Criner G, Hokanson JE, Brantley M, Rouhani FN, Sandhaus RA, Crapo JD, Silverman EK, the COPDGene Investigators. Alpha-1 antitrypsin PiMZ genotype is associated with chronic obstructive pulmonary disease in two racial groups. *Ann Am Thorac Soc* 2017 Aug; 14(8):1280-1287. PMID: 28380308 PMCID: 5566271  
<https://www.ncbi.nlm.nih.gov/pmc/articles/PMC5566271/>
242. Radder JE, Gregory AD, Leme AS, Cho MH, Chu Y, Kelly NJ, Bakke P, Gulsvik A, Litonjua AA, Sparrow D, Beaty TH, Crapo JD, Silverman EK, Zhang Y, Berndt A, Shapiro SD. Variable susceptibility to cigarette smoke-induced emphysema in 34 inbred strains of mice implicates Abi3bp in emphysema susceptibility. *Am J Respir Cell Mol Biol* 2017 Apr 25 [Epub ahead of print]. PMID: 28441029 PMCID: 5625220  
<https://www.ncbi.nlm.nih.gov/pmc/articles/PMC5625220/>
243. Bhatt SP, Bodduluri S, Hoffman EA, Newell Jr JD, Sieren JC, Dransfield MT, Reinhardt JM, COPDGene Investigators. Computed tomography measure of lung at risk and lung function decline in chronic obstructive pulmonary disease. *Am J Respir Crit Care Med* 2017 Sep 1; 196(5):569-576. PMID: 28481639 PMCID: 5620667  
<https://www.ncbi.nlm.nih.gov/pmc/articles/PMC5620667/>

244. Ash SY, Harmouche R, Putman RK, Ross JC, Diaz AA, Hunninghake GM, Onieva Onieva J, Martinez FJ, Choi AM, Lynch DA, Hatabu H, Rosas IO, San Jose Estepar R, Washko GR; COPDGene Investigators. Clinical and genetic associations of objectively identified interstitial changes in smokers. *Chest* 2017 Oct; 152(4):780-791. PMID: 28506611 PMCID: 5812756  
<https://www.ncbi.nlm.nih.gov/pmc/articles/PMC5812756/>
245. Hancock DB, Guo Y, Reginsson GW, Gaddis NC, Lutz SM, Sherva R, Loukola A, Minica CC, Markunas CA, Han Y, Young KA, Gudbjartsson DF, Gu F, McNeil DW, Qaiser B, Glasheen C, Olson S, Landi MT, Madden PAF, Farrer LA, Vink J, Saccone NL, Neale MC, Kranzler HR, McKay J, Hung RJ, Amos CI, Marazita ML, Boomsma DI, Baker TB, Gelernter J, Kaprio J, Caporaso NE, Thorgeirsson TE, Hokanson JE, Bierut LJ, Stefansson K, Johnson EO. Genome-wide association study across European and African American ancestries identifies a SNP in DNMT3B contributing to nicotine dependence. *Mol Psychiatry* 2017 Oct 3 [Epub ahead of print]. PMID: 28972577 PMCID: 5882602  
<https://www.ncbi.nlm.nih.gov/pmc/articles/PMC5882602/>
246. Parker MM, Chase RP, Lamb A, Reyes A, Saferali A, Yun JH, Himes BE, Silverman EK, Hersh CP, Castaldi PJ. RNA sequencing identifies novel non-coding RNA and exon-specific effects associated with cigarette smoking. *BMC Med Genomics* 2017 Oct 6; 10(1):58. PMID: 28985737 PMCID: 6225866  
<https://www.ncbi.nlm.nih.gov/pmc/articles/PMC6225866/>
247. Bradford E, Jacobson S, Varasteh J, Comellas AP, Woodruff P, O'Neal W, DeMeo DL, Li X, Kim V, Cho M, Castaldi PJ, Hersh C, Silverman EK, Crapo JD, Kechris K, Bowler RP. The value of blood cytokines and chemokines in assessing COPD. *Respir Res* 2017 Oct 24; 18(1):180. PMID: 29065892 PMCID: 5655820  
<https://www.ncbi.nlm.nih.gov/pmc/articles/PMC5655820/>
248. Martinez CH, Diaz AA, Meldrum CA, McDonald MN, Murray S, Kinney GL, Hokanson JE, Curtis JL, Bowler RP, Han MK, Washko GR, Regan EA; COPDGene Investigators. Handgrip strength in chronic obstructive pulmonary disease. Associations with acute exacerbations and body composition. *Ann Am Thorac Soc* 2017 Nov; 14(11):1638-1645. PMID: 29090990 PMCID: 5711268  
<https://www.ncbi.nlm.nih.gov/pmc/articles/PMC5711268/>
249. Hoogendoorn M, Feenstra TL, Boland M, Briggs AH, Borg S, Jansson SA, Risebrough N, Sleiko J, Rutten-van Molken MP. Prediction models for exacerbations in different COPD patient populations: results of five large data sources. *Int J Chron Obstruct Pulmon Dis* 2017 Nov 1; 12:3183-3194. PMID: 29138546 PMCID: 5677310  
<https://www.ncbi.nlm.nih.gov/pmc/articles/PMC5677310/>
250. Bowler RP, Hansel NN, Jacobson S, Barr RG, Make BJ, Han MK, O'Neal WK, Oelsner EC, Casaburi R, Barjaktarevic I, Cooper C, Foreman M, Wise RA, DeMeo DL, Silverman EK, Bailey W, Harrington KF, Woodruff PG, Drummond MB; for COPDGene and SPIROMICS Investigators. Electronic cigarette use in US adults at risk for or with COPD: analysis from two observational cohorts. *J Gen Intern Med* 2017 Dec; 32(12):1315-1322 PMID: 28884423 PMCID: 5698219  
<https://www.ncbi.nlm.nih.gov/pubmed/28884423> (abstract)

251. Bhatt SP, Vegas-Sánchez-Ferrero G, Rahaghi FN, MacLean ES, Gonzalez-Serrano G, Come CE, Kinney GL, Hokanson JE, Budoff MJ, Cuttica MJ, Wells JM, San José Estépar R, Washko GR. Cardiac morphometry on computed tomography and exacerbation reduction with  $\beta$ -blocker therapy in chronic obstructive pulmonary disease. *Am J Respir Crit Care Med* 2017 Dec 1; 196(11):1484-1488. PMID: 28441027 PMCID: 5736974  
<https://www.ncbi.nlm.nih.gov/pmc/articles/PMC5736974/>
252. Parulekar AD, Martinez C, Tsai CL, Locantore N, Atik M, Yohannes AM, Kao CC, Al-Azzawi H, Mohsin A, Wise RA, Foreman MG, Demeo DL, Regan EA, Make BJ, Boriek AM, Wiener LE, Hanania NA. Examining the effects of age on health outcomes of chronic obstructive pulmonary disease: results from the Genetic Epidemiology of Chronic Obstructive Pulmonary Disease Study and Evaluation of Chronic Obstructive Pulmonary Disease Longitudinally to Identify Predictive Surrogate Endpoints cohorts. *J Am Med Dir Assoc* 2017 Dec 1; 18(12):1063-1068. PMID: 29169736 PMCID: <https://www.ncbi.nlm.nih.gov/pubmed/29169736> (abstract)
253. Bodduluri S, Reinhardt JM, Hoffman EA, Newell JD, Nath H, Dransfield MT, Bhatt SP, for the COPD Gene Investigators. Signs of gas trapping in normal lung density regions in smokers. *Am J Respir Crit Care Med* 2017 Dec 1; 196(11):1404-1410. PMID: 28707983 PMCID: 5736979  
<https://www.ncbi.nlm.nih.gov/pmc/articles/PMC5736979/>
254. Labaki WW, Martinez CH, Martinez FJ, Galbán CJ, Ross BD, Washko GR, Barr RG, Regan EA, Coxson HO, Hoffman EA, Newell JD Jr, Curran-Everett D, Hogg JC, Crapo JD, Lynch DA, Kazerooni EA, Han MK. The role of chest computed tomography in the evaluation and management of the patient with chronic obstructive pulmonary disease. *Am J Respir Crit Care Med* 2017 Dec 1; 196(11):1372-1379. PMID: 28661698 PMCID: 5736976  
<https://www.ncbi.nlm.nih.gov/pmc/articles/PMC5736976/>
255. Parulekar AD, Martinez C, Tsai CL, Locantore N, Atik MA, Yohannes AM, Kao CC, Al-Azzawi H, Mohsin A, Wise RA, Foreman MG, DeMeo DL, Regan EA, Make BJ, Boriek AM, Wiener LE, Hanania NA. Examining the effects of age on health outcomes of chronic obstructive pulmonary disease: Results from the Genetic Epidemiology of Chronic Obstructive Pulmonary Disease Study and Evaluation of Chronic Obstructive Pulmonary Disease Longitudinally to identify predictive surrogate endpoints cohorts. *J Am Med Dir Assoc* 2017 Dec 1; 18(12):1063-1068. PMID: 29169736 PMCID: 5955393  
<https://www.ncbi.nlm.nih.gov/pmc/articles/PMC5955393/>
256. Schlauch D, Glass K, Hersh CP, Silverman EK, Quackenbush J. Estimating drivers cell state transitions using gene regulatory network models. *BMC Syst Biol* 2017 Dec 13; 11(1):139. PMID: 29237467 PMCID: 5729420  
<https://www.ncbi.nlm.nih.gov/pmc/articles/PMC5729420/>
257. McDonald MLN, Diaz AA, Rutten E, Lutz SM, Harmouche R, San José Estépar R, Kinney G, Hokanson JE, Gower BA, Wouters EFM, Rennard SI, Hersh CP, Casaburi R, Dransfield MT, Silverman EK, Washko GR. Chest computed tomography-derived low fat-free mass index and mortality in COPD. *Eur Respir J* 2017 Dec 14;



50(6):1701134. PMID: 29242259 PMCID: 5890424  
<https://www.ncbi.nlm.nih.gov/pmc/articles/PMC5890424/>

258. Fortis S, Eberlein M, Georgopoulos D, Comellas A. Predictive value of prebronchodilator and postbronchodilator spirometry for COPD features and outcomes. *BMJ Open Respir Res* 2017 Dec 18; 4(1):e000213. PMID: 29435342 PMCID: 5759707  
<https://www.ncbi.nlm.nih.gov/pmc/articles/PMC5759707/>
259. Rho JY, Lynch DA, Suh YJ, Nah JW, Zach JA, Schroeder JD, Cox CW, Bowler RP, Fenster B, Dransfield MT, Wells JM, Hokanson JE, Curran-Everett D, Williams A, Han MK, Crapo JD, Silverman EK. CT measurements of central pulmonary vasculature as predictors of severe exacerbation in COPD *Medicine (Baltimore)* 2018 Jan; 97(3):e9542. PMID: 29504975 PMCID: 5779744  
<https://www.ncbi.nlm.nih.gov/pubmed/29504975>
260. Boueiz A, Chang Y, Cho MH, Washko GR, San José Estépar R, Bowler RP, Crapo JD, DeMeo DL, Dy JG, Silverman EK, Castaldi PJ, COPDGene Investigators. Lobar emphysema distribution is associated with 5-year radiologic disease progression. *Chest* 2018 Jan; 153(1):65-76. PMID: 28943279 PMCID: 6026264  
<https://www.ncbi.nlm.nih.gov/pmc/articles/PMC6026264/>
261. Morrow JD, Cho MH, Platig J, Zhou X, DeMeo DL, Qiu W, Celli B, Marchetti N, Criner GJ, Bueno R, Washko GR, Glass K, Quackenbush J, Silverman EK, Hersh CP. Ensemble genomic analysis in human lung tissue identifies novel genes for chronic obstructive pulmonary disease. *Hum Genomics* 2018 Jan 15; 12(1):1. PMID: 29335020 PMCID: 5769240  
<https://www.ncbi.nlm.nih.gov/pmc/articles/PMC5769240/>
262. Fawzy A, Putcha N, Paulin LM, Aaron CP, Labaki WW, Han MK, Wise RA, Kanner RE, Bowler RP, Barr RG, Hansel NN; SPIROMICS and COPDGene Investigators. Association of thrombocytosis with COPD morbidity: the SPIROMICS and COPDGene cohorts. *Respir Res* 2018 Jan 26; 19(1):20. PMID: 29373977 PMCID: 5787242  
<https://www.ncbi.nlm.nih.gov/pmc/articles/PMC5787242/>
263. Hayden LP, Hardin ME, Qiu W, Lynch DA, Strand MJ, van Beek EJ, Crapo JD, Silverman EK, Hersh CP, COPDGene Investigators. Asthma is a risk factor for respiratory exacerbations without increased rate of lung function decline: five-year follow-up from the COPDGene study. *Chest* 2018 Feb; 153(2):368-377. PMID: 29248621 PMCID: 5815872  
<https://www.ncbi.nlm.nih.gov/pmc/articles/PMC5815872/>
264. Hecker J, Xu X, Townes FW, Loehlein Fier H, Corcoran C, Laird N, Lange C. Family-based tests for associating haplotypes with general phenotype data: Improving the FBAT-haplotype algorithm. *Genet Epidemiol* 2018 Feb; 42(1):123-126. PMID: 29159827 PMCID: 5774664  
<https://www.ncbi.nlm.nih.gov/pmc/articles/PMC5774664/>
265. Van de Moortele T, Wendt CH, Coletti F. Morphological and functional properties of the conducting human airways investigated by in vivo CT and in vitro MRI. *J Appl Physiol (1985)* 2018 Feb 1; 124(2):400-



413. PMID: 29097628 PMCID: 5867369  
<https://www.ncbi.nlm.nih.gov/pmc/articles/PMC5867369/>
266. Diaz AA, Strand M, Coxson HO, Ross JC, San Jose Estepar R, Lynch D, van Rikxoort EM, Rosas IO, Hunninghake GM, Putman RK, Hatabu H, Yen A, Kinney GL, Hokanson JE, Silverman EK, Crapo J, Washko GR. Disease severity dependence of the longitudinal association between CT lung density and lung function in smokers *Chest* 2018 Mar; 153(3):638-645. PMID: 29066389 PMCID: 5989632  
<https://www.ncbi.nlm.nih.gov/pmc/articles/PMC5989632/>
267. Sakornsakolpat P, Morrow JD, Castaldi PJ, Hersh CP, Bossé Y, Silverman EK, Manichaikul A, Cho MH. Integrative genomics identifies new genes associated with severe COPD and emphysema. *Respir Res* 2018 Mar 22; 19(1):46. PMID: 29566699 PMCID: 5863845  
<https://www.ncbi.nlm.nih.gov/pmc/articles/PMC5863845/>
268. Copeland Cr, Nath H, Terry NLJ, Wilson CG, Kim Y, Lynch DA, Bodduluri S, Wells JM, Dransfield MT, Diaz AA, Washko GR, Foreman MG, Chatt SP, for the COPDGene Investigators. Paratracheal paraseptal emphysema and expiratory central airway collapse in smokers. *Ann Am Thorac Soc* 2018 Apr; 15(4):479-484. PMID: 29298081 PMCID: 5879141  
<https://www.ncbi.nlm.nih.gov/pmc/articles/PMC5879141/>
269. Halper-Stromberg E, Yun JH, Parker MM, Tal Singer R, Gaggar A, Silverman EK, Leach S, Bowler RP, Castaldi PJ. Systemic Markers of Adaptive and Innate Immunity Are Associated with Chronic Obstructive Pulmonary Disease Severity and Spirometric Disease Progression. *Am J Respir Cell Mol Biol* 2018 Apr; 58(4):500-509. PMID: 29206476 PMCID: 5894501  
<https://www.ncbi.nlm.nih.gov/pmc/articles/PMC5894501/>
270. Glasheen C, Johnson EO, Saccone NL, Lutz SM, Baker TB, McNeil DW, Marazita ML, Hokanson JE, Bierut LJ, Hancock DB. Is the Fagerström test for nicotine dependence invariant across secular trends in smoking? A question for cross-birth cohort analysis of nicotine dependence. *Drug Alcohol Depend* 2018 Apr 1; 185:127-132. PMID: 29438887 PMCID: 5889733  
<https://www.ncbi.nlm.nih.gov/pmc/articles/PMC5889733/>
271. Diaz AA, Martinez CH, Harmouche R, Young TP, McDonald ML, Ross JC, Han ML, Bowler R, Make B, Regan EA, Silverman EK, Crapo J, Boriek AM, Kinney GL, Hokanson JE, Estepar RSJ, Washko GR. Pectoralis muscle area and mortality in smokers without airflow obstruction. *Respir Res* 2018 Apr 10; 19(1):62. PMID: 29636050 PMCID: 5894181  
<https://www.ncbi.nlm.nih.gov/pmc/articles/PMC5894181/>
272. Ju Suh Y, McDonald MN, Washko GR, Carolan BJ, Bowler RP, Lynch DA, Kinney GL, Bon JM, Cho MH, Crapo JD, Regan EA for the COPDGene Investigators. Lung, fat and bone: increased adiponectin associates with the combination of smoking-related lung disease and osteoporosis. *Chronic Obstr Pulm Dis* 2018 Apr 1; 5(2):134-143. PMID: 30374451 PMCID: 6190517  
<https://www.ncbi.nlm.nih.gov/pmc/articles/PMC6190517/>

273. Witry M, Comellas A, Simmering J, Polgreen P. The association between technology use and health status in a chronic obstructive pulmonary disease cohort: multi-method study. *J Med Internet Res* 2018 Apr 2; 20(4):e125. PMID: 29610113 PMCID: 5902698  
<https://www.ncbi.nlm.nih.gov/pmc/articles/PMC5902698/>
274. Vergara C, Parker MM, Franco L, Cho MH, Valencia-Duarte AV, Beaty TH, Duggal P. Genotype imputation performance of three reference panels using African ancestry individuals. *Genet* 2018 Apr; 137(4):281-292. PMID: 29637265 PMCID: 6209094  
<https://www.ncbi.nlm.nih.gov/pmc/articles/PMC6209094/>
275. Brunette AM, Holm KE, Wamboldt FS, Kozora E, Moser DJ, Make BJ, Crapo JD, Meschede K, Weinberger HD, Moreau KL, Bowler R, Hoth KF. Subjective cognitive complaints and neuropsychological performance in former smokers with and without chronic obstructive lung disease. *J Clin Exp Neuropsychol* 2018 May; 40(4):411-422. PMID: 28766459 PMCID: 5953430  
<https://www.ncbi.nlm.nih.gov/pmc/articles/PMC5953430/>
276. Bhatt SP, Kim Y, Harrington KF, Hokanson JE, Lutz S, Cho MH, DeMeo DL, Wells JM, Make BJ, Rennard SI, Washko GR, Foreman MG, Tashkin DP, Wise RA, Dransfield MT, Bailey WC, for the COPD Gene Investigators. Smoking duration alone provides stronger risk estimates of chronic obstructive pulmonary disease than pack-years. *Thorax* 2018 May; 73(5):414-421. PMID: 29326298 PMCID: 5903957  
<https://www.ncbi.nlm.nih.gov/pmc/articles/PMC5903957/>
277. Morrow JD, Glass K, Cho MH, Hersh CP, Pinto-Plata V, Celli B, Marchetti N, Criner G, Bueno R, Washko G, Choi AMK, Quakenbush J, Silverman EK, DeMeo D. Human lung DNA methylation quantitative trait loci colocalize with COPD genome-wide association loci. *Am J Respir Crit Care Med* 2018 May 15; 197(10):1275-1284. PMID: 29313708 PMCID: 5955059  
<https://www.ncbi.nlm.nih.gov/pmc/articles/PMC5955059/>
278. Carr LL, Jacobson S, Lynch DA, Foreman MG, Flenaugh EL, Hersh CP, Sciruba FC, Wilson DO, Sieren JC, Mulhall P, Kim V, Kinsey CM, Bowler RP. Features of COPD as predictors of lung cancer. *Chest* 2018 June; 153(6):1326-1335. PMID: 29452098 PMCID: 6026288  
<https://www.ncbi.nlm.nih.gov/pmc/articles/PMC6026288/>
279. Yun JH, Lamb A, Chase R, Parker MM, Saferali A, Singh D, Vestbo J, Tal-Singer R, Castaldi PJ, Silverman EK, Hersh CP, for the COPD Gene and ECLIPSE Investigators. Blood eosinophil count thresholds and exacerbations in patients with chronic obstructive pulmonary disease. *J Allergy Clin Immunol* 2018 Jun; 141(6):2037-2047.e10. PMID: 29709670 PMCID: 5994197  
<https://www.ncbi.nlm.nih.gov/pubmed/29709670> (abstract)
280. Park B, Koo SM, An J, Lee M, Kang HY, Qiao D, Cho MH, Sung J, Silverman EK, Yang HJ, Won S. Genome-wide assessment of gene-by-smoking interactions in COPD. *Sci Rep* 2018 Jun 18; 8(1):9319. PMID: 29915320 PMCID: 6006158  
<https://www.ncbi.nlm.nih.gov/pmc/articles/PMC6006158/>

281. Mamary AJ, Stewart JI, Kinney GL, Hokanson JE, Shenoy K, Dransfield MT, Foreman MG, Vance GB, Criner GJ; COPDGene Investigators. Race and gender disparities are evident in COPD underdiagnoses across all severities of measured airflow obstruction. *Chronic Obstr Pulm Dis* 2018 Jul 2; 5(3):177-184. PMID: 30584581 PMCID: 6296789  
<https://www.ncbi.nlm.nih.gov/pmc/articles/PMC6296789/>
282. Han MK, Tayob N, Murray S, Woodruff PG, Curtis JL, Kim V, Criner G, Galban CJ, Ross BD, Hoffman EA, Lynch DA, Kazerooni E, Martinez FJ, for the COPDGene and SPIROMICS Investigators. Association between emphysema and COPD outcomes in COPDGene and SPIROMICS cohorts. *Am J Respir Crit Care Med* 2018 Jul 15; 198(2):265-267. PMID: 29485901 PMCID: 6058986  
<https://www.ncbi.nlm.nih.gov/pmc/articles/PMC6058986/>
283. Jiang Y, Chen S, McGuire D, Chen F, Liu M, Iacono WG, Hewitt JK, Hokanson JE, Krauter K, Laakso M, Li KW, Lutz SM, McGue M, Pandit A, Zajac GJM, Boehnke M, Abecasis GR, Vrieze SI, Zhan X, Jiang B, Liu DJ. Proper conditional analysis in the presence of missing data: application to large scale meta-analysis of tobacco use phenotypes. *PLoS Genet* 2018 Jul 17; 14(7):e1007452. PMID: 30016313 PMCID: 6063450  
<https://www.ncbi.nlm.nih.gov/pmc/articles/PMC6063450/>
284. Ash SY, Harmouche R, Ross JC, Diaz AA, Rahagi FN, Sanchez-Ferraro GV, Putman RK, Hunninghake GM, Onieva Onieva J, Martinez FJ, Choi AM, Bowler RP, Lynch DA, Hatabu H, Bhatt SP, Dransfield MT, Wells JM, Rosas IO, San Jose Estepar R, Washko GR, for the COPDGene Investigators. Interstitial features at chest CT enhance the deleterious effects of emphysema in the COPDGene cohort. *Radiology* 2018 Aug; 288(2):600-609. PMID: 29869957 PMCID: 6069608  
<https://www.ncbi.nlm.nih.gov/pmc/articles/PMC6069608/>
285. Bian Z, Charbonnier JP, Liu J, Zhao D, Lynch DA, van Ginneken B. Small airway segmentation in thoracic computed tomography scans: a machine learning approach. *Phys Med Biol* 2018 Aug 6; 63(15):155024. PMID: 29995646 PMCID: <https://www.ncbi.nlm.nih.gov/pmc/articles/PMC6105345/>
286. Bian Z, Charbonnier JP, Liu J, Zhao D, Lunch DA, van Ginneken B. Small airway segmentation in thoracic computed tomography scans: a machine learning approach. *Phys Med Biol* 2018 Aug 6; 63(15):155024. PMID: 29995646 PMCID: 6105345  
<https://www.ncbi.nlm.nih.gov/pubmed/29995646> (abstract)
287. Bhatt SP, Kazerooni EA, Newell JD Jr, Hokanson JE, Budoff MJ, Dass CA, Martinez CH, Bodduluri S, Jacobson FL, Yen A, Dransfield MT, Fuhrman C, Nath H, for the COPDGene Investigators. Visual estimate of coronary artery calcium predicts cardiovascular disease in COPD. *Chest* 2018 Sep; 154(3):579-587. PMID: 29890123 PMCID: 6130328  
<https://www.ncbi.nlm.nih.gov/pmc/articles/PMC6130328/>
288. Adami A, Hobbs BD, McDonald MN, Casaburi R, Rossiter HB, for the COPDGene Investigators. Genetic variants predicting aerobic capacity response to training are also associated with skeletal muscle oxidative capacity in moderate-to-severe

- COPD. *Physiol Genomics* 2018 Sep 1; 50(9):688-690. PMID: 29799805 PMCID: 6172613  
<https://www.ncbi.nlm.nih.gov/pmc/articles/PMC6172613/>
289. Lynch DA, Moore CM, Wilson CS, Nevrekar D, Jennerman T, Humphries SM, Austin JHM, Grenier PA, Kauczor H, Han MK, Regan EA, Make BJ, Bowler RP, Beaty TH, Curan-Everett D, Hokanson JE, Curtis JL, Silverman EK, Crapo JD, COPDGene Investigators. CT based visual classification of emphysema: Association with mortality in the COPDGene study. *Radiology* 2018 Sep; 288(3):859-866. PMID: 29762095 PMCID: 6122195  
<https://www.ncbi.nlm.nih.gov/pmc/articles/PMC6122195/>
290. Ekström M, Bornefalk-Hermansson A, Wysham N, Currow DC, MacIntyre N. Spirometric volumes and breathlessness across levels of airflow limitation: the COPDGene study. *Am J Respir Crit Care Med* 2018 Sep 1; 198(5):678-681. PMID: 29702011 PMCID: 6118014  
<https://www.ncbi.nlm.nih.gov/pmc/articles/PMC6118014/>
291. Togninalli M, Roqueiro D, COPDGene Investigators, Borgwardt KM. Accurate and adaptive imputation of summary statistics in mixed-ethnicity cohorts. *Bioinformatics* 2018 Sep 1; 34(17):i687-i696. PMID: 30423082 PMCID: 61219295  
<https://www.ncbi.nlm.nih.gov/pmc/articles/PMC6129295/>
292. Cheplygina V, Pena IP, Pedersen JH, Lynch DA, Sørensen L, de Bruijn M. Transfer learning for multicenter classification of chronic obstructive pulmonary disease. *IEEE J Biomed Health Inform* 2018 Sep; 22(5):1486-1496. PMID: 29990220 PMCID:  
<https://www.ncbi.nlm.nih.gov/pubmed/29990220>
293. Sharma A, Kitsak M, Ameli A, Cho MH, Zhou X, Jiang Z, Crapo JD, Beaty TH, Menche J, Bakke PS, Santolini M, Silverman EK. Integration of molecular interactome and targeted interaction analysis to identify a COPD disease network module. *Sci Rep* 2018 Sep 27; 8(1):14439. PMID: 30262855 PMCID: 6160419  
<https://www.ncbi.nlm.nih.gov/pmc/articles/PMC6160419/>
294. DeMeo DL, Ramagopalan S, Kavati A, Vegesna A, Han MK, Yadao A, Wilcox TK, Make BJ; COPDGene Investigators. Women manifest more severe COPD symptoms across the life course. *Int J Chron Obstruct Pulmon Dis* 2018 Oct 1; 13:3021-3029. PMID: 30319250 PMCID: 6171761  
<https://www.ncbi.nlm.nih.gov/pmc/articles/PMC6171761/>
295. Kinney GL, Santorico SA, Young KA, Cho MH, Castaldi PJ, San José Estépar R, Ross JC, Dy JG, Make BJ, Regan EA, Lynch DA, Everett DC, Lutz SM, Silverman EK, Washko GR, Crapo JD, Hokanson JE; COPDGene Investigators. Identification of chronic obstructive pulmonary disease axes that predict all-cause mortality: the COPDGene study. *Am J Epidemiol* 2018 Oct 1; 187(10):2109-2116. PMID: 29771274 PMCID: 6166205  
<https://www.ncbi.nlm.nih.gov/pmc/articles/PMC6166205/>
296. Luehrs RE, Newell Jr JD, Comellas AP, Hoffman EA, Warner K, Croghan A, DuBose LE, Nopoulos P, Magnotta V, Arndt S, Pierce GL, Hoth KF. CT-measured lung air-trapping is associated with higher carotid artery stiffness in individuals with chronic

- obstructive pulmonary disease. *J Appl Physiol* 2018 Oct 11; 125:1760-1766. PMID: 30307820 PMCID: <https://www.ncbi.nlm.nih.gov/pmc/articles/PMC6859127/>
297. Ross JC, Castaldi PJ, Cho MH, Hersh CP, Rahaghi FM, Sánchez-Ferrero GV, Parker MM, Litonjua AA, Sparrow D, Dy JG, Silverman EK, Washko GR, and San José Estépar R. Longitudinal modeling of lung function trajectories in smokers with and without COPD. *Am J Respir Crit Care Med* 2018 Oct 15; 198(8):1033-1042. PMID: 29671603 PMCID: 6221566 <https://www.ncbi.nlm.nih.gov/pmc/articles/PMC6221566/>
298. Hayden LP, Cho MH, Raby BA, Beaty TH, Silverman EK, Hersh CP, COPDGene Investigators. Childhood asthma is associated with COPD and known asthma variants in COPDGene: a genome-wide association study. *Respir Res* 2018 Oct 29;19(1):209. PMID: 30373671 PMCID: 6206739 <https://www.ncbi.nlm.nih.gov/pmc/articles/PMC6206739/>
299. Ash SY, Harmouche R, Putman RK, Ross JC, Martinez FJ, Choi AM, Bowler RP, Regan EA, Curtis JL, Han MK, Boucher RC, O'Neal WK, Hatabu H, Lynch DA, Rosas IO, Hunninghake GM, San José Estépar R, Washko GR. Association between acute respiratory disease events and the MUC5B promoter polymorphism in smokers. *Thorax* 2018 Nov; 73(11):1071-1074. PMID: 29440587 PMCID: 6089672 <https://www.ncbi.nlm.nih.gov/pmc/articles/PMC6089672/>
300. Prokopenko D, Sakornsakolpat P, Loehlein Fier H, Qiao D, Parker MM, McDonald MN, Manichaikul A, Rich SS, Barr RG, Williams CJ, Brantly ML, Lange C, Beaty TH, Crapo JD, Silverman EK, Cho MH, COPDGene Investigators, NHLBI TOPMed Investigators. Whole genome sequencing in severe chronic obstructive pulmonary disease. *Am J Respir Cell Mol Biol* 2018 Nov 1; 59(5):614-622. PMID: 29949718 PMCID: 6236690 <https://www.ncbi.nlm.nih.gov/pmc/articles/PMC6236690/>
301. Qiao D, Ameli A, Propenko D, Chen H, Kho AT, Parker MM, Morrow J, Hobbs BD, Liu Y, Laird N, Beaty TH, Crapo JD, Barnes KC, Nickerson DA, Bamshad M, Hersh CP, Lomas DA, Agusti A, Make BJ, Calverley P, Donner CF, Wouters EF, Vestbo J, Pare PD, Levy RD, Rennard SI, Tal-Singer R, Spitz MR, Sharma A, Ruczinski I, Lange C, Silverman EK, Cho MH, NHLBI Exome Sequencing Project, University of Washington Center for Mendelian Genomics, Lung GO, COPDGene Investigators. *Hum Mol Genet* 2018 Nov 1; 27(21):3801-3812. PMID: 30060175 PMCID: 6196654 <https://www.ncbi.nlm.nih.gov/pmc/articles/PMC6196654/>
302. Castaldi PJ, Benet M, Petersen H, Rafaels N, Finigan J, Paoletti M, Boezen HM, Vonk JM, Bowler R, Pistolesi M, Puhan MA, Anto J, Wauters E, Lambrechts D, Janssens W, Bigazzi F, Camiciottoli G, Cho MH, Hersh CP, Barnes K, Rennard S, Boorgula MP, Dy J, Hansel NH, Crapo JD, Tesfaigzi Y, Agusti A, Silverman EK, Garcia-Aymerich J. Do COPD subtypes really exist? COPD heterogeneity and clustering in ten independent cohorts. *Thorax* 2017 Nov; 72(11):998-1006. PMID: 28637835 PMCID: 6013053 <https://www.ncbi.nlm.nih.gov/pmc/articles/PMC6013053/>



303. Lowe KE, Make BJ, Crapo JD, Kinney GL, Hokanson JE, Kim V, Iyer AS, Bhatt SP, Hoth KF, Holm KE, Wise R, DeMeo D, Foreman MG, Stone TJ, Regan EA, COPDGene Investigators. Association of low-income with pulmonary disease progression in smokers with and without chronic obstructive pulmonary disease. *ERJ Open Res* 2018; 4:00069-2018. PMID: 30443555 PMCID: 6230816  
<https://www.ncbi.nlm.nih.gov/pmc/articles/PMC6230816/>
304. Wells JM, Parker MM, Oster RA, Bowler RP, Dransfield MT, Bhatt SP, Cho MH, Kim V, Curtis JL, Martinez FJ, Paine R, O'Neal W, Labaki WW, Kaner RJ, Barjaktarevic I, Han MK, Silverman EK, Crapo JD, Barr RG, Woodruff P, Castaldi PJ, Gaggari A, for the SPIROMICS and COPDGene Investigators. Elevated circulating MMP-9 is associated with increased exacerbation risk in COPD: results from SPIROMICS and COPDGene. *JCI Insight* 2018 Nov 15; 3(22):e123614. PMID: 30429371 PMCID: 6302944  
<https://www.ncbi.nlm.nih.gov/pmc/articles/PMC6302944/>
305. Budoff MJ, Lutz SM, Kinney GL, Young KA, Hokanson JE, Barr RG, Steiner R, Nath H, Lopez-Garcia C, Duca LM, Rahmani S, Osawa K, Regan EA, Li D, Casaburi R. Coronary artery calcium on noncontrast thoracic computerized tomography scans and all-cause mortality. *Circulation* 2018 Nov 20; 138(21):2437-2438. PMID: 30571584 PMCID: 6317728  
<https://www.ncbi.nlm.nih.gov/pubmed/30571584> (abstract)
306. Diaz AA, Maselli DJ, Rahaghi F, Come CE, Yen A, Maclean ES, Okajima Y, Martinez CH, Yamashiro T, Lynch DA, Wang W, Kinney GL, Washko GR, San José Estépar R. Vascular pruning in smokers with bronchiectasis. *ERJ Open Res* 2018 Nov 23; 4(4). pii: 00044-2018. PMID: 30480001 PMCID: 6250564  
<https://www.ncbi.nlm.nih.gov/pmc/articles/PMC6250564/>
307. Bhatt SP, Bhakta N, Wilson CG, Cooper C, Barjaktarevic I, Bodduluri S, Kim YI, Eberlein M, Woodruff PG, Sciurba FC, Castaldi PJ, Han MK, Dransfield MT, Nakhmani A, for the COPDGene Investigators. New spirometry indices for detecting mild airflow obstruction. *Sci Rep* 2018 Nov 30; 8(1):17484. PMID: 30504791 PMCID: 6269456  
<https://www.ncbi.nlm.nih.gov/pmc/articles/PMC6269456/>
308. Seo M, Qiu W, Bailey W, Criner GJ, Dransfield MT, Fuhlbrigge AL, Reilly JJ, Scholand MB, Castaldi P, Chase R, Parker M, Saferali A, Yun JH, Crapo JD, Cho MH, Beaty TH, Silverman EK, Hersh CP. Genomics and response to long-term oxygen therapy in chronic obstructive pulmonary disease. *J Mol Med (Berl)* 2018 Dec; 96(12):1375-1385. PMID: 30353303 PMCID: 6240374  
<https://www.ncbi.nlm.nih.gov/pmc/articles/PMC6240374/>
309. Wan ES, Fortis S, Regan EA, Hokanson J, Han MK, Casaburi R, Make BJ, Crapo JD, DeMeo DL, Silverman EK, COPDGene Investigators. Longitudinal phenotypes and mortality in preserved ratio impaired spirometry in the COPDGene Study. *Am J Respir Crit Care Med* 2018 Dec 1; 198(11):1397-1405. PMID: 29874098 PMCID: 6290948  
<https://www.ncbi.nlm.nih.gov/pmc/articles/PMC6290948/>
310. Bodduluri S, Puliyakote ASK, Gerard SE, Reinhardt JM, Hoffman EA, Newell JD Jr, Nath HP, Han MK, Washko GR, San José Estépar R, Dransfield MT, Bhatt SP, for the COPDGene Investigators. Airway fractal dimension predicts respiratory morbidity and



mortality in Chronic Obstructive Pulmonary Disease. *J Clin Invest* 2018 Dec 3; 128(12):5374-5382 PMID: 30256767 PMCID: 6264725  
<https://www.ncbi.nlm.nih.gov/pmc/articles/PMC6264725/>

311. Gerard SE, Patton TJ, Christensen GE, Bayouth JE, Reinhardt JM. FissureNet: A deep learning approach for pulmonary fissure detection in CT images. *IEEE Trans Med Imaging* 2019 Jan;38(1):156-166. PMID: 30106711 PMCID: 6318012  
<https://www.ncbi.nlm.nih.gov/pmc/articles/PMC6318012/>
312. Jou SS, Yagihashi K, Zach JA, Lynch D, Suh YJ; COPDGene Investigators. Relationship between current smoking, visual CT findings and emphysema index in cigarette smokers. *Clin Imaging* 2019 Jan-Feb; 53:195-199. PMID: 30419414 PMCID: 6633913  
<https://www.ncbi.nlm.nih.gov/pmc/articles/PMC6633913/>
313. Charbonnier JP, Pompe E, Moore C, Humphries S, van Ginneken B, Make B, Regan E, Crapo JD, van Rikxoort EM, and Lynch DA, COPDGene investigators. Airway wall thickening on CT: relation to smoking status and severity of COPD. *Respir Med* 2019 Jan; 146:36-41. PMID: 30665516 PMCID: 6639031  
<https://www.ncbi.nlm.nih.gov/pmc/articles/PMC6639031/>
314. Criner RN, Labaki WW, Regan EA, Bon JM, Soler X, Bhatt SP, Murray S, Hokanson JE, Silverman EK, Crapo JD, Curtis JL, Martinez FJ, Make BJ, Han MK, Martinez CH, for the COPDGene Investigators. Mortality and exacerbations by Global Initiative for Chronic Obstructive Lung Disease groups ABCD: 2011 vs. 2017 in the COPDGene cohort. *Chronic Obstr Pulm Dis* 2019 Jan 10; 6(1):64-73. PMID: 30775425 PMCID: 6373581  
<https://www.ncbi.nlm.nih.gov/pmc/articles/PMC6373581/>
315. Heinzman JT, Hoth KF, Cho MH, Sakornsakolpat P, Regan EA, Make BJ, Kinney GL, Wamboldt FS, Holm KE, Bormann N, Robles J, Kim V, Iyer AS, Silverman EK, Crapo JD, Han S, Potash JB, Shinozaki G. GWAS and systems biology analysis of depressive symptoms among smokers from the COPDGene cohort. *J Affect Disord* 2019 Jan 15; 243:16-22. PMID: 30219690 PMCID: 6186181  
<https://www.ncbi.nlm.nih.gov/pubmed/30219690> (abstract)
316. Liu M, Jiang Y, Wedow R, Li Y, Brazel DM, Chen F, Datta G, Davila-Velderrain J, McGuire D, Tian C, Zhan X, Choquet H, Docherty AR, Faul JD, Foerster JR, Fritsche LG, Gabrielsen ME, Gordon SD, Haessler J, Hottenga JJ, Huang H, Jang SK, Jansen PR, Ling Y, Mägi R, Matoba N, McMahon G, Mulas A, Orrù V, Palviainen T, Pandit A, Reginsson GW, Skogholt AH, Smith JA, Taylor AE, Turman C, Willemsen G, Young H, Young KA, Zajac GJM, Zhao W, Zhou W, Bjornsdottir G, Boardman JD, Boehnke M, Boomsma DI, Chen C, Cucca F, Davies GE, Eaton CB, Ehringer MA, Esko T, Fiorillo E, Gillespie NA, Gudbjartsson DF, Haller T, Harris KM, Heath AC, Hewitt JK, Hickie IB, Hokanson JE, Hopfer CJ, Hunter DJ, Iacono WG, Johnson EO, Kamatani Y, Kardina SLR, Keller MC, Kellis M, Kooperberg C, Kraft P, Krauter KS, Laakso M, Lind PA, Loukola A, Lutz SM, Madden PAF, Martin NG, McGue M, McQueen MB, Medland SE, Metspalu A, Mohlke KL, Nielsen JB, Okada Y, Peters U, Polderman TJC, Posthuma D, Reiner AP, Rice JP, Rimm E, Rose RJ, Runarsdottir V, Stallings MC, Stan?áková A, Stefansson H, Thai KK, Tindle HA, Tyrfinngsson T, Wall TL, Weir DR, Weisner C,

- Whitfield JB, Winsvold BS, Yin J, Zuccolo L, Bierut LJ, Hveem K, Lee JJ, Munafò MR, Saccone NL, Willer CJ, Cornelis MC, David SP, Hinds DA, Jorgenson E, Kaprio J, Stitzel JA, Stefansson K, Thorgeirsson TE, Abecasis G, Liu DJ, Vrieze S. Association studies of up to 1.2 million individuals yield new insights into the genetic etiology of tobacco and alcohol use. *Nat Genet* 2019 Feb; 51(2):237-244. PMID: 30643251 PMCID: 6358542  
<https://www.ncbi.nlm.nih.gov/pubmed/30643251> (abstract)
317. Labaki WW, Gu T, Murray S, Hatt CR, Galbán CJ, Ross BD, Martinez CH, Curtis JL, Hoffman EA, Pompe E, Lynch DA, Kazerooni EA, Martinez FJ, Han MK. Voxel-wise longitudinal parametric response mapping analysis of chest computed tomography in smokers. *Acad Radiol* 2019 Feb; 26(2):217-223. PMID: 30055897 PMCID: 6340741  
<https://www.ncbi.nlm.nih.gov/pubmed/30055897> (abstract)
318. Bhatt SP, Washko GR, Hoffman EA, Newell JD, Bodduluri S, Diaz AA, Galban CJ, Silverman EK, San José Estépar R, Lynch DA, for the COPDGene Investigators. Imaging advances in chronic obstructive pulmonary disease: insights from the Genetic Epidemiology of Chronic Obstructive Pulmonary Disease (COPDGene) Study. *Am J Respir Crit Care Med* 2019 Feb 1; 199(3):286-301. PMID: 30304637 PMCID: 6363977  
<https://www.ncbi.nlm.nih.gov/pmc/articles/PMC6363977/>
319. Bowler RP, Allinder M, Jacobson S, Miller AL, Miller BE, Tal-Singer R, Locantore N. Real-world use of rescue inhaler sensors, electronic symptom questionnaires and physical activity monitors in COPD. *BMJ Open Res* 2019; 6:e000350. PMID: 30956796 PMCID: 6424295  
<https://www.ncbi.nlm.nih.gov/pmc/articles/PMC6424295/>
320. Shrine N, Tobin MD, Wain LV, Guyatt AL et al. New genetic signals for lung function highlight pathways and pleiotropy, and chronic obstructive pulmonary disease associations across multiple ancestries. *Nat Genet* 2019 Mar; 51(3):481-493. PMID: 30804560 PMCID: 6397078  
<https://www.ncbi.nlm.nih.gov/pubmed/30804560> (abstract)
321. Sakornsakolpat P, Prokopenko D, Lamontagne M, Reeve NF, Guyatt AL, Jackson VE, Shrine N, Qiao D, Bartz TM, Kim DK, Lee MK, Latourelle JC, Li X, Morrow JD, Obeidat M, Wyss AB, Bakke P, Barr RG, Beaty TH, Belinsky SA, Brusselle GG, Crapo JD, de Jong K, DeMeo DL, Fingerlin TE, Gharib SA, Gulsvik A, Hall IP, Hokanson JE, Kim WJ, Lomas DA, London SJ, Meyers DA, O'Connor GT, Rennard SI, Schwartz DA, Sliwinski P, Sparrow D, Strachan DP, Tal-Singer R, Tesfaygi Y, Vestbo J, Vonk JM, Yim JJ, Zhou X, Bossé Y, Manichaikul A, Lahousse L, Silverman EK, Boezen HM, Wain LV, Tobin MD, Hobbs BD, Cho MH; SpiroMeta Consortium; International COPD Genetics Consortium. Genetic landscape of chronic obstructive pulmonary disease identifies heterogeneous cell-type and phenotype associations. *Nat Genet* 2019 Mar; 51(3):494-505. PMID: 30804561 PMCID: 6546635  
<https://www.ncbi.nlm.nih.gov/pubmed/30804561> (abstract)
322. Iyer AS, Holm KE, Bhatt SP, Kim V, Kinney GL, Wamboldt FS, Jacobs MR, Regan EA, Armstrong HF, Lowe KE, Martinez CH, Dransfield MT, Foreman MG,

- Shinozaki G, Hanania NA, Wise RA, Make BJ, Hoth KF, COPDGene Investigators. Symptoms of anxiety and depression and use of anxiolytic-hypnotics and antidepressants in current and former smokers with and without COPD – A cross sectional analysis of the COPDGene cohort. *J Psychosom Res* 2019 Mar; 118:18-26. PMID: 30782350 PMCID: 6383809  
<https://www.ncbi.nlm.nih.gov/pmc/articles/PMC6383809/>
323. Miller ER, Putman RK, Diaz AA, Xu H, San José Estépar R, Araki T, Nishino M, Poli de Frías S, Hida T, Ross J, Coxson H, Dupuis J, O'Connor GT, Silverman EK, Rosas IO, Hatabu H, Washko G, Hunninghake GM; Evaluation of COPD Longitudinally to Identify Predictive Surrogate Endpoints (ECLIPSE) and COPDGene investigators. Increased airway wall thickness in interstitial lung abnormalities and idiopathic pulmonary fibrosis. *Ann Am Thorac Soc* 2019 Apr; 16(4):447-454 PMID: 30543456 PMCID: 6441702  
<https://www.ncbi.nlm.nih.gov/pmc/articles/PMC6441702/>
324. Boueiz A, Pham B, Chase R, Lamb A, Lee S, Naing ZZC, Cho MH, Parker MM, Sakornsakolpat P, Hersh CP, Crapo JD, Stergachis AB, Tal-Singer R, DeMeo DL, Silverman EK, Zhou X, Castaldi PJ; COPDGene investigators, by Core Units, ECLIPSE Investigators, GenKOLS Investigators. Integrative genomics analysis identifies ACVR1B as a candidate causal gene of emphysema distribution. *Am J Respir Cell Mol Biol* 2019 Apr; 60(4):388-398. PMID: 30335480 PMCID: <https://www.ncbi.nlm.nih.gov/pmc/articles/PMC6444627/>
325. Hecker J, Laird N, Lange C. A comparison of popular TDT-generalizations for family-based association analysis. *Genet Epidemiol* 2019 Apr; 43(3):300-317. PMID: 30609057 PMCID: 6599182  
<https://www.ncbi.nlm.nih.gov/pmc/articles/PMC6599182/>
326. Parker MM, Lutz SM, Hobbs BD, Busch R, McDonald MN, Castaldi PJ, Beaty TH, Hokanson JE, Silverman EK, Cho MH. Assessing pleiotropy and mediation in genetic loci associated with chronic obstructive pulmonary disease. *Genet Epidemiol* 2019 Apr; 43(3):318-329. PMID: 30740764 PMCID: 6416067  
<https://www.ncbi.nlm.nih.gov/pmc/articles/PMC6416067/>
327. Sakornsakolpat P, McCormack M, Bakke P, Guslvik A, Make BJ, Crapo JD, Cho MH, Silverman EK. Genome-wide association analysis of single-breath DLCO. *Am J Respir Cell Mol Biol* 2019 May; 60(5):523-531. PMID: 30694715 PMCID: 6503619  
<https://www.ncbi.nlm.nih.gov/pmc/articles/PMC6503619/>
328. Oudkerk SF, Mohamed Hoesein FA, Öner FC, Verlaan JJ, de Jong PA, Kuperus JS, Cho M, McDonald ML, Lynch DA, Silverman EK, Crapo JD, Make BJ, Lowe KE, Regan EA. New criteria for diffuse idiopathic skeletal hyperostosis: development and validation. *J Rheumatol* 2019 May 1 [Epub ahead of print]. PMID: 31043539 PMCID: <https://www.ncbi.nlm.nih.gov/pubmed/31043539> (abstract)
329. Lutz SM, Frederiksen B, Begum F, McDonald ML, Cho MH, Hobbs B, Parker MM, DeMeo DL, Hersh CP, Eringer M, Young K, Jiang L, Foreman MG, Kinney GL, Make BJ, Lomas DA, Bakke P, Gulsvik A, Crapo JD, Silverman EK, Beaty TH, Hokanson JE; ECLIPSE and COPDGene Investigators. Common and rare variants genetic association analysis of cigarettes per day among ever smokers in COPD cases and

controls. *Nicotine Tob Res* 2019 May 21; 21(6):714-722. PMID: 29767774 PMCID: 6528143

<https://www.ncbi.nlm.nih.gov/pmc/articles/PMC6528143/>

330. Van de Moortele T, Goerke U, Wendt CH, Coletti F. Airway morphology and inspiratory flow features in the early stages of Chronic Obstructive Pulmonary Disease. *Clin Biomech (Bristol, Avon)* 2019 Jun; 66:60-65. PMID: 29169684 PMCID: 5955793  
<https://www.ncbi.nlm.nih.gov/pmc/articles/PMC5955793/>
331. Uthoff J, Stephens MJ, Newell JD Jr, Hoffman EA, Larson J, Koehn N, De Stefano FA, Lusk CM, Wenzlaff AS, Watzka D, Neslund-Dudas C, Carr LL, Lynch DA, Schwartz AG, Sieren JC. Machine learning approach for distinguishing malignant and benign lung nodules utilizing standardized perinodular parenchymal features from CT. *Med Phys* 2019 Jul; 46(7):3207-3216. PMID: 31087332 PMCID: 6945763  
<https://www.ncbi.nlm.nih.gov/pmc/articles/PMC6945763/>
332. Fortis S, Comellas A, Make BJ, Hersh CP, Bodduluri S, Georgopoulos D, Kim V, Criner GJ, Dransfield MT, Bhatt SP, COPDGene Investigators. Combined Forced Expiratory Volume in 1 Second and Forced Vital Capacity Bronchodilator Response, Exacerbations, and Mortality in Chronic Obstructive Pulmonary Disease. *Ann Am Thorac Soc* 2019 Jul; 16(7):826-835. PMID: 30908927 PMCID: 6600841  
<https://www.ncbi.nlm.nih.gov/pmc/articles/PMC6600841/>
333. Moore C, Blumhagen RZ, Yang IV, Walts A, Powers J, Walker T, Bishop M, Russell P, Vestal B, Cardwell J, Markin CR, Mathai SK, Schwarz MI, Steele MP, Lee J, Brown KK, Loyd JE, Crapo JD, Silverman EK, Cho MH, James JA, Guthridge JM, Cogan JD, Kropski JA, Swigris JJ, Bair C, Kim DS, Ji W, Kim H, Song JW, Maier LA, Pacheco KA, Hirani N, Poon AS, Li F, Jenkins RG, Braybrooke R, Saini G, Maher TM, Molyneaux PL, Saunders P, Zhang Y, Gibson KF, Kass DJ, Rojas M, Sembrat J, Wolters PJ, Collard HR, Sundry JS, O'Riordan T, Streck ME, Noth I, Ma SF, Porteous MK, Kreider ME, Patel NB, Inoue Y, Hirose M, Arai T, Akagawa S, Eickelberg O, Fernandez IE, Behr J, Mogulkoc N, Corte TJ, Glaspole I, Tomassetti S, Ravaglia C, Poletti V, Crestani B, Borie R, Kannengiesser C, Parfrey H, Fiddler C, Rassel D, Molina-Molina M, Machahua C, Worboys AM, Gudmundsson G, Isaksson HJ, Lederer DJ, Podolanczuk AJ, Montesi SB, Bendstrup E, Danchel V, Selman M, Pardo A, Henry MT, Keane MP, Doran P, Vašáková M, Sterclova M, Ryerson CJ, Wilcox PG, Okamoto T, Furusawa H, Miyazaki Y, Laurent G, Baltic S, Prele C, Moodley Y, Shea BS, Ohta K, Suzukawa M, Narumoto O, Nathan SD, Venuto DC, Woldehanna ML, Kokturk N, de Andrade JA, Luckhardt T, Kulkarni T, Bonella F, Donnelly SC, McElroy A, Armstrong ME, Aranda A, Carbone RG, Puppò F, Beckman KB, Nickerson DA, Fingerlin TE, Schwartz DA. Resequencing study confirms that host defense and cell senescence gene variants contribute to the risk of idiopathic pulmonary fibrosis. *Am J Respir Crit Care Med* 2019 Jul 15; 200(2):199-208. PMID: 31034279 PMCID: 6635791  
<https://www.ncbi.nlm.nih.gov/pmc/articles/PMC6635791/>
334. Kim W, Cho MH, Sakornsakolpat P, Lynch DA, Coxson HO, Tal-Singer R, Silverman EK, Beaty TH. DSP variants may be associated with longitudinal change in quantitative emphysema. *Respir Res* 2019 Jul 19;

20(1):160. PMID: 31324189 PMCID: 6642569  
<https://www.ncbi.nlm.nih.gov/pmc/articles/PMC6642569/>

335. Regan EA, Lowe KE, Make BJ, Lynch DA, Kinney GL, Budoff MJ, Mao SS, Dyer D, Curtis JL, Bowler RP, Han MK, Beaty TH, Hokanson JE, Kern E, Humphries S, Curran-Everett D, van Beek EJR, Silverman EK, Crapo JD, COPDGene Investigators. Identifying smoking-related disease on lung cancer screening CT scans: increasing the value. *Chronic Obstr Pulm Dis* 2019 Jul 24; 6(3):233-245. PMID: 31342730 PMCID: <https://www.ncbi.nlm.nih.gov/pubmed/31342730>
336. Stringer WW, Porszasz J, Bhatt SP, McCormack MC, Make BJ, Casaburi R. Physiologic insights from the COPD genetic epidemiology study. *Chronic Obstr Pulm Dis* 2019 Jul 25; 6(3):256-266. PMID: 31342731 PMCID: <https://www.ncbi.nlm.nih.gov/pubmed/31342731>
337. Parker MM, Hao Y, Guo F, Pham B, Chase R, Platig J, Cho MH, Hersh CP, Thannickal VJ, Crapo J, Washko G, Randell SH, Silverman EK, San José Estépar R, Zhou X, Castaldi PJ. Identification of an emphysema-associated genetic variant near TGFB2 with context-specific regulatory effects in fibroblasts. *Elife* 2019 Jul 25; 8. pii: e42720. PMID: 31343404 PMCID: 6693893  
<https://www.ncbi.nlm.nih.gov/pmc/articles/PMC6693893/>
338. Maselli DJ, Bhatt SP, Anzueto A, Bowler RP, DeMeo DL, Diaz AA, Dransfield MT, Fawzy A, Foreman MG, Hanania NA, Hersh CP, Kim V, Kinney GL, Putcha N, Wan ES, Wells JM, Westney GE, Young KA, Silverman EK, Han MK, Make BJ. Clinical epidemiology of COPD – Insights from 10 years of the COPDGene study. *Chest* 2019 Aug; 156(2):228-238. PMID: 31154041 PMCID: 7198872  
<https://www.ncbi.nlm.nih.gov/pmc/articles/PMC7198872/>
339. Regan EA, Hersh CP, Castaldi PJ, DeMeo DL, Silverman EK, Crapo JD, Bowler RP. Omics and the search for blood biomarkers in COPD: Insights from COPDGene. *Am J Respir Cell Mol Biol* 2019 Aug; 61(2):143-149 PMID: 30874442 PMCID: 6670029  
<https://www.ncbi.nlm.nih.gov/pmc/articles/PMC6670029/>
340. Bhatt SP, Bodduluri S, Raghav V, Bhakta N, Wilson CG, Kim YI, Eberlein M, Sciruba FC, Han MK, Dransfield MT, Nakhmani A, COPDGene Investigators. The peak index: spirometry metric for airflow obstruction severity and heterogeneity. *Ann Am Thorac Soc* 2019 Aug; 16(8):982-989. PMID: 30865842 PMCID: 6774744  
<https://www.ncbi.nlm.nih.gov/pmc/articles/PMC6774744/>
341. Ryan SM, Fingerlin TE, Mroz M, Barkes B, Hamzeh N, Maier LA, Carlson NE. Radiomic measures from chest high-resolution computed tomography associated with lung function in sarcoidosis. *Eur Respir J* 2019 Aug 29; 54(2):1900371. PMID: 31196947 PMCID: 7261239  
<https://www.ncbi.nlm.nih.gov/pmc/articles/PMC7261239/>
342. Washko GR, Nardelli P, Ash SY, Vegas Sanchez-Ferrero G, Rahaghi FN, Come CE, Dransfield MT, Kalhan R, Han MK, Bhatt S, Wells JM, Aaron CP, Diaz AA, Ross JC, Cuttica MJ, Labaki WW, Querejeta Roca G, Shah AM, Young K, Kinney GL, Hokanson JE, Agusti A, San José Estépar R; COPDGene Investigators. Arterial vascular



- pruning, right ventricular size and clinical outcomes in COPD. *Am J Respir Crit Care Med* 2019 Aug 15; 200(4):454-461. PMID: 30758975 PMCID: 6701031  
<https://www.ncbi.nlm.nih.gov/pmc/articles/PMC6701031/>
343. Chen J, Cho MH, Silverman EK, Hokanson JE, Kinney G, Crapo JD, Rennard SI, Dy J, Castaldi PJ. Turning subtypes into disease axes to improve prediction of COPD progression. *Thorax* 2019 Sep; 74(9):906-909. PMID: 31189730 PMCID: 7500804  
<https://www.ncbi.nlm.nih.gov/pmc/articles/PMC7500804/>
344. Ragland MF, Benway CJ, Lutz SM, Bowler RP, Hecker J, Hokanson JE, Crapo JD, Castaldi PJ, DeMeo DL, Hersh CP, Hobbs BD, Lange C, Beaty TH, Cho MH, Silverman EK. Genetic Advances in COPD: Insights from COPDGene. *Am J Respir Crit Care Med* 2019 Sep 15; 200(6):677-690. PMID: 30908940 PMCID: 6775891  
<https://www.ncbi.nlm.nih.gov/pmc/articles/PMC6775891/>
345. Uthoff J, Koehn N, Larson J, Dilger SKN, Hammond E, Schwartz A, Mullan B, Sanchez R, Hoffman RM, Sieren JC, COPDGene Investigators. Post-imaging pulmonary nodule mathematical prediction models: are they clinically relevant? *Eur Radiol* 2019 Oct; 29(10):5367-5377. PMID: 30937590 PMCID: 6717521  
<https://www.ncbi.nlm.nih.gov/pmc/articles/PMC6717521/>
346. Kim V, Zhao H, Regan E, Han MK, Make BJ, Crapo JD, Jones PW, Curtis JL, Silverman EK, Criner GJ; COPDGene Investigators. The St. George's Respiratory Questionnaire Definition of Chronic Bronchitis May Be a Better Predictor of COPD Exacerbations Compared with the Classic Definition. *Chest* 2019 Oct; 156(4):685-695. PMID: 31047955 PMCID: 6859248  
<https://www.ncbi.nlm.nih.gov/pmc/articles/PMC6859248/>
347. Young KA, Regan E, Han MK, Lutz SM, Ragland M, Castaldi PJ, Washko GR, Cho MH, Strand M, Curran-Everett D, Beaty TH, Bowler RP, Wan ES, Lynch D, Make B, Silverman EK, Crapo JD, Hokanson JE, Kinney GL, and the COPDGene Investigators. Subtypes of COPD Have Unique Distributions and Differential Risk of Mortality. *Chronic Obstr Pulm Dis* 2019 Nov; 6(5):400-413. PMID: 31710795 PMCID: 7020845  
<https://www.ncbi.nlm.nih.gov/pmc/articles/PMC7020845/>
348. Lowe KE, Regan EA, Anzueto A, Austin E, Austin JHM, Beaty TH, Benos PV, Benway CJ, Bhatt SP, Bleecker ER, Bodduluri S, Bon J, Boriek AM, Boueiz A, Bowler RP, Budoff M, Casaburi R, Castaldi PJ, Charbonnier JP, Cho MH, Comellas A, Conrad D, Costa Davis C, Criner GJ, Curran-Everett D, Curtis JL, mDeMeo DL, Diaz AA, Dransfield MT, Dy JG, Fawzy A, Fleming M, Flenaugh EL, Foreman MG, Fortis S, Gebrekristos H, Grant S, Grenier PA, Gu T, Gupta A, Han MK, Hanania NA, Hansel NN, Hayden LP, Hersh CP, Hobbs DB, Hoffman EA, Hogg JC, Hokanson JE, Hoth KF, Hsiao A, Humphries S, Jacobs K, Jacobson FL, Kazerooni EA, Kim V, Kim WJ, Kinney GL, Koegler H, Lutz SM, Lynch DA, MacIntyre Jr NR, Make BJ, Marchetti N, Martinez FJ, Maselli DJ, Matthews AM, McCormack MC, McDonald MN, McEvoy CE, Moll M, Moyle SS, Murray S, Nath H, Newell Jr JD, Occhipinti M, Paoletti M, Parekh T, Pistolesi M, Pratte KA, Putcha N, Ragland M, Reinhardt JM, Rennard SI, Rosiello RA, Ross JC, Rossiter HB, Ruczinski I, San Jose EstÃ©par R, Sciruba FC, Sieren JC, Singh H, Soler X, Steiner RM, Strand MJ, Stringer WW, Tal-Singer R, Thomashow B, Vegas SÃ¡nchez-



- Ferrero G, Walsh JW, Wan ES, Washko GR, Wells JM, Wendt CH, Westney G, Wilson A, Wise RA, Yen A, Young K, Yun J, Silverman EK, Crapo JD. COPDGene 2019: Redefining the Diagnosis of Chronic Obstructive Pulmonary Disease. *Chronic Obstr Pulm Dis* 2019 Nov; 6(5):384-399. PMID: 31710793 PMCID: 7020846  
<https://www.ncbi.nlm.nih.gov/pmc/articles/PMC7020846/>
349. An J, Won S, Lutz SM, Hecker J, Lange C. Effect of population stratification on SNP-by-environment interaction. *Genet Epidemiol* 2019 Dec; 43(8):1046-1055. PMID: 31429121 PMCID: 6829023  
<https://pubmed.ncbi.nlm.nih.gov/31429121>
350. Balasubramanian A, MacIntyre NR, Henderson RJ, Jensen RL, Kinney G, Stringer WW, Hersh CP, Bowler RP, Casaburi R, Han MK, Porszasz J, Barr RG, Make BJ, Wise RA, McCormack MC. Diffusing capacity of carbon monoxide in assessment of chronic obstructive pulmonary disease. *Chest* 2019 Dec; 156(6):1111-1119. PMID: 31352035 PMCID: 7242635  
<https://www.ncbi.nlm.nih.gov/pubmed/31352035> (abstract)
351. Hobbs BD, Putman RK, Araki T, Nishino M, Gudmundsson G, Gudnason V, Eiriksdottir G, Zilhao Nogueira RD, Dupuis J, Xu H, O'Connor GT, Manichaikul A, Nguyen J, Podolanczuk AJ, Madahar P, Rotter JI, Lederer DJ, Barr RG, Rich SS, Ampleford EJ, Ortega VE, Peters SP, O'Neal WK, Newell JD Jr, Bleecker ER, Meyers DA, Allen RJ, Oldham JM, Ma SF, Noth I, Jenkins RG, Maher TM, Hubbard RB, Wain LV, Fingerlin TE, Schwartz DA, Washko GR, Rosas IO, Silverman EK, Hatabu H, Cho MH, Hunninghake GM, COPDGene Investigators, ELIPSE Investigators, SPIROMICS Research Group and UK ILD Consortium. Overlap of genetic risk between interstitial lung abnormalities and idiopathic pulmonary fibrosis. *Am J Respir Crit Care Med* 2019 Dec 1; 200(11):1402-1413. PMID: 31339356 PMCID: 6884045  
<https://www.ncbi.nlm.nih.gov/pmc/articles/PMC6884045/>
352. Criner RN, Hatt CR, Galbán CJ, Kazerooni EA, Lynch DA, McCormack MC, Casaburi R, MacIntyre NR, Make BJ, Martinez FJ, Labaki WW, Curtis JL, Han MLK. Relationship between diffusion capacity and small airway abnormality in COPDGene. *Respir Res* 2019 Dec 2; 20(1):269. PMID: 31791337 PMCID: 6889734  
<https://www.ncbi.nlm.nih.gov/pmc/articles/PMC6889734/>
353. Trisha Parekh; Smita Bhatia; Andrea Cherrington; Young-il Kim; Allison Lambert; Anand Iyer; Elizabeth A. Reagan; Dawn L. DeMeo; MeiLan Han; Mark T Dransfield. Factors influencing decline in quality of life in smokers without airflow obstruction: The COPDGene study. *Respir Med* 2020 Jan; 161:105820. PMID: 31759270 PMCID:  
<https://pubmed.ncbi.nlm.nih.gov/31759270/>
354. Park J, Hobbs BD, Crapo JD, Make BJ, Regan EA, Humphries S, Carey VJ, Lynch DA, Silverman EK, COPDGene Investigators. Subtyping COPD using visual and quantitative CT features. *Chest* 2020 Jan; 157(1):47-60. PMID: 31283919 PMCID: 6965698  
<https://www.ncbi.nlm.nih.gov/pubmed/31283919> (abstract)
355. Bermejo-Peláez D, Ash SY, Washko GR, San José Estépar R, Ledesma-Carbayo MJ. Classification of interstitial lung abnormality patterns with an ensemble of deep

- convolutional neural networks. *Sci Rep* 2020 Jan 15; 10(1):338. PMID: 31941918 PMCID: 6962320  
<https://www.ncbi.nlm.nih.gov/pmc/articles/PMC6962320/>
356. Hersh CP, Zacharia S, Prakash Arivu Chelvan R, Hayden LP, Mirtar A, Zarei S, Putcha N, COPDGene Investigators. Immunoglobulin E as a biomarker for the overlap of atopic asthma and chronic obstructive pulmonary disease. *Chronic Obstr Pulm Dis* 2020 Jan; 7(1):1-12. PMID: 31999898 PMCID: 7182380  
<https://www.ncbi.nlm.nih.gov/pmc/articles/PMC7182380/>
357. Young AL, Bragman FJS, Rangelov B, Han MK, Galbán CJ, Lynch DA, Hawkes DJ, Alexander DC, Hurst JR for the COPDGene Investigators. Disease progression modeling in chronic obstructive pulmonary disease (COPD). *Am J Respir Crit Care Med* 2020 Feb 1; 201(3):294-302. PMID: 31657634 PMCID: 6999095  
<https://www.ncbi.nlm.nih.gov/pubmed/31657634>
358. Humphries SM, Notary AM, Centeno JP, Strand MJ, Crapo JD, Silverman EK, Lynch DA, COPDGene Investigators. Deep learning enables automatic classification of emphysema pattern at CT. *Radiology* 2020 Feb; 294(2):434-444. PMID: 31793851 PMCID: 6996603  
<https://www.ncbi.nlm.nih.gov/pubmed/31793851>
359. Gerard SE, Herrmann J, Kaczka DW, Musch G, Fernandez-Bustamante A, Reinhardt JM. Multi-resolution convolutional neural networks for fully automated segmentation of acutely injured lungs in multiple species. *Med Image Anal* 2020 Feb; 60:101592. PMID: 31760194 PMCID: 6980773  
<https://pubmed.ncbi.nlm.nih.gov/31760194/>
360. LaFon DC, Bhatt SP, Labaki WW, Rahaghi FN, Moll M, Bowler RP, Regan EA, Make BJ, Crapo JD, San Jose Estépar R, Diaz AA, Silverman ED, Han MK, Hobbs B, Cho MH, Washko GR, Dransfield MT, Wells JM, COPDGene Investigators. Pulmonary artery enlargement and mortality risk in moderate to severe COPD: results from COPDGene. *Eur Respir J* 2020 Feb 12; 55(2):1901812. PMID: 31772001 PMCID: 7179358  
<https://www.ncbi.nlm.nih.gov/pubmed/31772001>
361. Fortis S, Comellas A, Kim V, Casaburi R, Hokanson JE, Crapo JD, Silverman EK, Wan ES. Low FVC/TLC in Preserved Ratio Impaired Spirometry (PRISm) is associated with features of and progression to obstructive lung disease. *Sci Rep* 2020 Mar 20; 10(1):5169. PMID: 32198360 PMCID: 7083974  
<https://www.ncbi.nlm.nih.gov/pmc/articles/PMC7083974/>
362. Mastej E, Gillenwater L, Zhuang Y, Pratte KA, Bowler RP, Kechris K. Identifying Protein-Metabolite Networks associated with COPD Phenotypes *Metabolites* 2020 Mar 25; 10(4):124. PMID: 32218378 PMCID: 7241079  
<https://www.ncbi.nlm.nih.gov/pmc/articles/PMC7241079/>
363. Morrow JD, Make BJ, Regan EA, Han MK, Hersh CP, Tal-Singer R, Quackenbush J, Choi AMK, Silverman EK, DeMeo DL. DNA methylation is predictive of mortality in current and former smokers. *Am J Respir Crit Care Med* 2020 May 1; 201(9):1099-1109. PMID: 31995399 PMCID: 7193844  
<https://www.ncbi.nlm.nih.gov/pubmed/31995399>

364. Wilson AC, Kumar PL, Lee S, Parker MM, Arora I, Morrow JD, Wouters EFM, Casaburi R, Rennard SI, Lomas DA, Agusti A, Tal-Singer R, Dransfield MT, Wells JM, Bhatt SP, Washko G, Thannickal VJ, Tiwari HK, Hersh CP, Castaldi PJ, Silverman EK, McDonald MN. Heme metabolism genes Downregulated in COPD Cachexia. *Respir Res* 2020 May 1; 21(1):100. PMID: 32354332 PMCID: 7193359  
<https://www.ncbi.nlm.nih.gov/pmc/articles/PMC7193359/>
365. Hoth KF, Moreau KL, Weinberger HD, Holm KE, Meschede K, Crapo JD, Make BJ, Moser DJ, Kozora E, Bowler RP, Pierce GL, Ten Eyck P, Wamboldt FS. Carotid artery stiffness is associated with cognitive performance in former smokers with and without Chronic Obstructive Pulmonary Disease (COPD). *J Am Heart Assoc* 2020 May; 9:e014862. PMID: 32338117 PMCID: 7428572  
<https://www.ncbi.nlm.nih.gov/pmc/articles/PMC7428572/>
366. Occhipinti M, Paoletti M, Crapo JD, Make BJ, Lynch DA, Brusasco V, Lavorini F, Silverman EK, Regan EA, Pistolesi M Validation of a method to assess emphysema severity by spirometry in the COPDGene study. *Respir Res* 2020 May 1; 21(1):103. PMID: 32357885 PMCID: 7195744  
<https://www.ncbi.nlm.nih.gov/pmc/articles/PMC7195744/>
367. Castaldi PJ, Boueiz A, Yun J, San Jose Estepar R, Ross JC, Washko G, Cho MH, Hersh CP, Kinney GL, Young KA, Regan EA, Lynch DA, Criner GJ, Dy JG, Rennard SI, Casaburi R, Make BJ, Crapo J, Silverman EK, Hokanson JE; COPDGene Investigators Machine Learning Characterization of COPD Subtypes: Insights from the COPDGene Study *Chest* May 2020; 157(5):1147-1157. PMID: 31887283 PMCID: 7242638  
<https://pubmed.ncbi.nlm.nih.gov/31887283/>
368. Xie W, Jacobs C, Charbonnier J, van Ginneken B. Relational modeling for robust and efficient pulmonary lobe segmentation in CT scans. *IEEE Transactions on Medical Imaging* 2020 May 15. doi. 0.1109/TMI.2020.2995108 PMID: 32550251 PMCID: 7280905  
<https://pubmed.ncbi.nlm.nih.gov/32550251/>
369. Lutz SM, Sordillo JE, Hokanson JE, Chen Wu A, Lange C. The effects of misspecification of the mediator and outcome in mediation analysis. *Genet Epidemiol* 2020 Jun; 44(4):400-403. PMID: 32166765 PMCID: 7205563  
<https://pubmed.ncbi.nlm.nih.gov/32166765/>
370. Ryan SM, Vestal B, Maier LA, Carlson NE, Muschelli J. Template creation for high-resolution computed tomography scans of the lung in R software. *Acad Radiol* 2020 Aug; 27(8):e204-e215. PMID: 31843391 PMCID: 7292778  
<https://www.ncbi.nlm.nih.gov/pubmed/31843391>
371. Moll M, Qiao D, Regan EA, Hunninghake GM, Make BJ, Tal-Singer R, McGeachie M, Castaldi PJ, San José Estépar R, Washko GR, Wells JM, LaFon D, Strand M, Bowler RP, Han MK, Vestbo J, Celli B, Calverley P, Crapo JD, Silverman EK, Hobbs BD, Cho MH. Machine learning and prediction of all-cause mortality in COPD. *Chest* 2020 Sep; 158(3):952-964. PMID: 32353417 PMCID:  
<https://pubmed.ncbi.nlm.nih.gov/32353417/>

372. Oh AS, Strand M, Pratte K, Regan EA, Humphries S, Crapo JD, Lynch DA, COPDGene Investigators. Visual emphysema on chest CT in GOLD stage 0 cigarette smokers predicts disease progression: results from the COPDGene study. *Radiology* 2020 Sep; 296(3):641-649. PMID: 32633676 PMCID: 7457948  
<https://pubmed.ncbi.nlm.nih.gov/32633676/>
373. Croghan A, Brunette A, Holm KE, Kozora E, Moser DJ, Wamboldt FS, Meschede K, Make BJ, Crapo JD, Weinberger HD, Moreau KL, Bowler R, Hoth KF. Reduced attention in former smokers with and without COPD. *Int J Behav Med* 2019 Dec; 26(6):600-607. PMID: 31732904 PMCID: 7269072  
<https://pubmed.ncbi.nlm.nih.gov/31732904/>

*Note that publications of secondary analyses of the COPDGene cohort are ongoing and additional detail can be found at <http://www.copdgene.org/publications>.*

## **Appendix E5**

### **ECLIPSE Publications**

#### Population

Agustí A, Calverley PM, Celli B, et al. Characterisation of COPD heterogeneity in the ECLIPSE cohort. *Respir Res*. 2010;11:122.

Vestbo J, Edwards LD, Scanlon PD, et al. Changes in forced expiratory volume in 1 second over time in COPD. *N Engl J Med*. 2011;365(13):1184-92.

Albert P, Agustí A, Edwards L, et al. Bronchodilator responsiveness as a phenotypic characteristic of established chronic obstructive pulmonary disease. *Thorax*. 2012;67(8):701-8.

Agustí A, Edwards LD, Celli B, et al. Characteristics, stability and outcomes of the GOLD 2011 COPD groups in the ECLIPSE cohort. *Eur Respir J*. 2013;42(3):636-46.

Miller J, Edwards LD, Agustí A, et al. Comorbidity, systemic inflammation and outcomes in the ECLIPSE cohort. *Respir Med*. 2013;107(9):1376-84.

Hanson C, Sayles H, Rutten EEPA, et al. The association between dietary intake and phenotypical characteristics of COPD in the ECLIPSE cohort. *Chronic Obstr Pulm Dis*. 2014;1(1):115-24.

Hersh CP, Make BJ, Lynch DA, et al. Non-emphysematous chronic obstructive pulmonary disease is associated with diabetes mellitus. *BMC Pulm Med*. 2014;14(1):164.

Singh D, Kolsum U, Brightling CE, et al. Eosinophilic inflammation in COPD: prevalence and clinical characteristics. *Eur Respir J*. 2014;44(6):1697-700.

Rutten EPA, Spruit MA, McDonald M-LN, et al. Continuous fat-free mass decline in COPD: fact or fiction? *Eur Respir J*. 2015;46(5):1496-8.

#### Health Status

Hanania NA, Müllerova H, Locantore NW, et al. Determinants of depression in the ECLIPSE chronic obstructive pulmonary disease cohort. *Am J Respir Crit Care Med*. 2011;183(5):604-11.

Al-Shair K, Muellerova H, Yorke J, et al. Examining fatigue in COPD: development, validity and reliability of a modified version of FACIT-F scale. *Health Qual Life Outcomes*. 2012;10:100.

Gietema HA, Edwards LD, Coxson HO, et al. Impact of emphysema and airway wall thickness on quality of life in smoking-related COPD. *Respir Med*. 2013;107(8):1201-9.

Rutten EP, Calverley PM, Casaburi R, et al. Changes in body composition in patients with chronic obstructive pulmonary disease: do they influence patient-related outcomes? *Ann Nutr Metab*. 2013;63(3):239-47.

Janssen DJA, Mullerova H, Agustí A, et al. Persistent systemic inflammation and symptoms of depression among patients with COPD in the ECLIPSE cohort. *Respir Med*. 2014;108:1647-54.

Yohannes AM, Müllerova H, Hanania N, et al. Persistence of depressive symptoms in patients with COPD: A 3-year longitudinal follow-up analysis of the ECLIPSE study cohort. *Chest*. 2014;146:33A. doi:10.1378/chest.1978679.

Agustí A, Rennard S, Edwards LD, et al. Clinical and prognostic heterogeneity of C and D GOLD groups. *Eur Respir J*. 2015;46:250-4.

Wilke S, Jones PW, Müllerova H, et al. One-year change in health status and subsequent outcomes in COPD. *Thorax*. 2015;70:420-5.

#### Exacerbations

Hurst JR, Vestbo J, Anzueto A, et al. Susceptibility to exacerbation in chronic obstructive pulmonary disease. *N Eng J Med*. 2010;363(12):1128-38.

Crim C, Celli B, Edwards L, et al. Respiratory system impedance with impulse oscillometry in healthy and COPD subjects: ECLIPSE baseline results. *Respir Med*. 2011;105(7):1069-78.

Donaldson GC, Müllerova H, Locantore N, et al. Factors associated with change in exacerbation frequency in COPD. *Respir Res*. 2013;14:79.

Benson VS, Müllerová H, Vestbo J, et al. Associations between gastro-oesophageal reflux, its management and exacerbations of chronic obstructive pulmonary disease. *Respir Med*. 2015;109(9):1147-54.

Müllerova H, Maselli DJ, Locantore N, et al. Hospitalized exacerbations of COPD: risk factors and outcomes in the ECLIPSE cohort. *Chest*. 2015;147(4):999-1007.

Joppa P, Tkacova R, Franssen FM, et al. Sarcopenic obesity, functional outcomes, and systemic inflammation in patients with chronic obstructive pulmonary disease. *J Am Med Dir Assoc*. 2016;17(8):712-8.

Yohannes AM, Müllerová H, Lavoie K, et al. The association of depressive symptoms with rates of acute exacerbations in patients with COPD: results from a 3-year longitudinal follow-up of the ECLIPSE cohort. *J Am Med Dir Assoc*. 2017;18(11):955-9.

#### Exercise Tolerance and Activity

Spruit MA, Watkins ML, Edwards LD, et al. Determinants of poor 6-min walking distance in patients with COPD: the ECLIPSE cohort. *Respir Med.* 2010;104(6):849-57.

Polkey MI, Spruit MA, Edwards LD, et al. Six-minute-walk test in chronic obstructive pulmonary disease: minimal clinically important difference for death or hospitalization. *Am J Respir Crit Care Med.* 2012;187(4):382-6.

Spruit MA, Polkey MI, Celli B, et al. Predicting outcomes from 6-minute walk distance in chronic obstructive pulmonary disease. *J Am Med Dir Assoc.* 2012;13(3):291-7.

Waschki B, Spruit MA, Watz H, et al. Physical activity monitoring in COPD: compliance and associations with clinical characteristics in a multicenter study. *Respir Med.* 2012;106(4):522-30.

Polkey MI, Spruit MA, Wouters E, et al. Reply: minimal or maximal clinically important difference: using death to define MCID. *Am J Respir Crit Care Med.* 2013;187(12):1392.

Sumner H, Woodcock A, Kolsum U, et al. Predictors of objective cough frequency in chronic obstructive pulmonary disease. *Am J Respir Crit Care Med.* 2013;187(9):943-9.

Andrianopolous V, Wouters EFM, Pinto-Planta V, et al. Prognostic value of variables derived from the six-minute walk test in patients with COPD: Results from the ECLIPSE study. *Respir Med.* 2015;109:1138-46.

Andrianopoulos V, Celli BR, Franssen FM, et al. Determinants of exercise-induced oxygen desaturation including pulmonary emphysema in COPD: Results from the ECLIPSE study. *Respir Med.* 2016;119:87-95.

## Genomics

Cho MH, Boutaoui N, Klanderman BA, et al. Variants in FAM13A are associated with chronic obstructive pulmonary disease. *Nat Genet.* 2010;42(3):200-2.

Foreman MG, Kong X, DeMeo DL, et al. Polymorphisms in surfactant protein-D are associated with chronic obstructive pulmonary disease. *Am J Respir Cell Mol Biol.* 2010;44(3):316-22.

Pillai SG, Kong X, Edwards LD, et al. Loci identified by genome-wide association studies influence different disease-related phenotypes in chronic obstructive pulmonary disease. *Am J Respir Crit Care Med.* 2010;182(12):1498-505.

Wan ES, Cho MH, Boutaoui N, et al. Genome-wide association analysis of body mass in chronic obstructive pulmonary disease. *Am J Respir Cell Mol Biol.* 2010;45(2):304-10.

Brehm JA, Hagiwara LK, Tesfaigzi Y, et al. Identification of FGF7 as a novel susceptibility locus for chronic obstructive pulmonary disease. *Thorax.* 2011;66(12):1085-90.

Castaldi PJ, Cho MH, Litonjua AA, et al. The association of genome-wide significant spirometric loci with chronic obstructive pulmonary disease susceptibility. *Am J Respir Cell Mol Biol.* 2011;45(6):1147-53.

Kong X, Cho MH, Anderson WH, et al. Genome-wide association study identifies BICD1 as a susceptibility gene for emphysema. *Am J Respir Crit Care Med.* 2011;183(1):43-9.

Lipman P, Cho M, Bakke P, et al. On the follow-up of genome-wide association studies: an overall test for the most promising SNPs. *Genet Epidemiol.* 2011;35(5):303-09.



Qiu W, Cho MH, Riley JH, et al. Genetics of sputum gene expression in chronic obstructive pulmonary disease. *PLoS One*. 2011;6(9):e24395.

Siedlinski M, Cho MH, Bakke P, et al. Genome-wide association study of smoking behaviours in patients with COPD. *Thorax*. 2011;66(10):894-902.

Singh D, Fox SM, Tal-Singer R, et al. Induced sputum genes associated with spirometric and radiological disease severity in COPD ex-smokers. *Thorax*. 2011;66(6):489-95.

Aminuddin F, Akhbir L, Stefanowicz D, et al. Genetic association between human chitinases and lung function in COPD. *Hum Genet*. 2012;131(7):1105-14.

Cho MH, Castaldi PJ, Wan ES, et al. A genome-wide association study in COPD identifies a susceptibility locus on chromosome 19q13. *Hum Mol Genet*. 2012;21(4):947-57.

Kim DK, Cho MH, Hersh CP, et al. Genome-wide association analysis of blood biomarkers in chronic obstructive pulmonary disease. *Am J Respir Crit Care Med*. 2012;186(12):1238-47.

Wilk JB, Shrine NR, Loehr LR, et al. Genome wide association studies identify CHRNA5/3 and HTR4 in the development of airflow obstruction. *Am J Respir Crit Care Med*. 2012;186(7):622-32.

Aminuddin F, Hackett TL, Stefanowicz D, et al. Nitric oxide synthase polymorphisms, gene expression and lung function in chronic obstructive pulmonary disease. *BMC Pulm Med*. 2013;13(1):64.

Hansel NN, Ruczinski I, Rafaels N, et al. Genome-wide study identifies two loci associated with lung function decline in mild to moderate COPD. *Hum Genet*. 2013;132(1):79-90.

Siedlinski M, Tingley D, Lipman PJ, et al. Dissecting direct and indirect genetic effects on chronic obstructive pulmonary disease (COPD) susceptibility. *Hum Genet*. 2013;132(4):431-41.

Zhou X, Qiu W, Sathirapongsasutil JF, et al. Gene expression analysis uncovers novel Hedgehog interacting protein (HHIP) effects in human bronchial epithelial cells. *Genomics*. 2013;101(5):263-72.

Cho MH, McDonald ML, Zhou X, et al. Risk loci for chronic obstructive pulmonary disease: a genome-wide association study and meta-analysis. *Lancet Respir Med*. 2014;2(3):214-25.

Glass K, Quackenbush J, Silverman EK, et al. Sexually-dimorphic targeting of functionally-related genes in COPD. *BMC Syst Biol*. 2014;8(1):118.

Lee JH, Cho MH, Hersh CP, et al. Genetic susceptibility for chronic bronchitis in chronic obstructive pulmonary disease. *Respir Res*. 2014;15(1):113.

McDonald M-L, Cho M, Sorheim I-C, et al. Common genetic variants associated with resting oxygenation in chronic obstructive pulmonary disease. *Am J Respir Cell Mol Biol*. 2014;51(5):678-87.

McDonald ML, Mattheisen M, Cho MH, et al. Beyond GWAS in COPD: probing the landscape between gene-set associations, genome-wide associations and protein-protein interaction networks. *Hum Hered*. 2014;78(3):131-9.

Menche J, Sharma A, Cho MH, et al. A diVIusive Shuffling Approach (VIStA) for gene expression analysis to identify subtypes in chronic obstructive pulmonary disease. *BMC Syst Biol*. 2014;8(Suppl 2):S8.

- Singh D, Fox SM, Tal-Singer R, et al. Altered gene expression in blood and sputum in COPD frequent exacerbators in the ECLIPSE Cohort. *PLoS ONE*. 2014;29(9):e107381.
- Castaldi PJ, Cho MH, Zhou X, et al. Genetic control of gene expression at novel and established chronic obstructive pulmonary disease loci. *Hum Mol Genet*. 2015;24(4):1200-10.
- Dijkstra AE, Boezen HM, van den Berge M, et al. Dissecting genetic risk factors for chronic mucus hypersecretion in heavy smokers with and without COPD. *Eur Respir J*. 2015;45(1):60-75.
- Lee JH, Cho MH, Hersh CP, et al. IREB2 and GALC are associated with pulmonary artery enlargement in chronic obstructive pulmonary disease. *Am J Respir Cell Mol Biol*. 2015;52(3):365-76.
- Chang Y, Glass K, Liu YY, et al. COPD subtypes identified by network-based clustering of blood gene expression. *Genomics*. 2016;107(2):51-8.
- Obeidat ME, Ding X, Fishbane N, et al. The effect of different case definitions of current smoking on the discovery of smoking-related blood gene expression signatures in chronic obstructive pulmonary disease. *Nicotine Tob Res*. 2016;18(9):1903-9.
- Busch R, Hobbs BD, Zhou J, et al. Genetic association and risk scores in a chronic obstructive pulmonary disease meta-analysis of 16,707 subjects. *Am J Respir Cell Mol Biol*. 2017;57(1):35-46.
- Hobbs BD, De Jong K, Lamontagne M, et al. Genetic loci associated with chronic obstructive pulmonary disease overlap with loci for lung function and pulmonary fibrosis. *Nat Genet*. 2017;49(3):426-32.

## Imaging

- Basanta M, Jarvis RM, Xu Y, et al. Non-invasive metabolomic analysis of breath using differential mobility spectrometry in patients with chronic obstructive pulmonary disease and healthy smokers. *Analyst*. 2010;135(2):315-20.
- Gietema HA, Müller NL, Fauerbach PV, et al. Quantifying the extent of emphysema: factors associated with radiologists' estimations and quantitative indices of emphysema severity using the ECLIPSE cohort. *Acad Radiol*. 2011;18(6):661-71.
- Coxson H, Dirksen A, Edwards L, et al. The presence and progression of emphysema in COPD as determined by CT scanning and biomarker expression: a prospective analysis from the ECLIPSE study. *Lancet Respir Med*. 2013;1(2):129-36.
- Romme EA, Murchison JT, Edwards LD, et al. CT-measured bone attenuation in patients with chronic obstructive pulmonary disease: relation to clinical features and outcomes. *J Bone Miner Res*. 2013;28(6):1369-77.
- McDonald ML, Diaz AA, Ross JC, et al. Quantitative computed tomographic measures of pectoralis muscle area and disease severity in chronic obstructive pulmonary disease: a cross-sectional study. *Ann Am Thorac Soc*. 2014;11(3):326-34.
- Cho MH, Castaldi PJ, Hersh CP, et al. A genome-wide association study of emphysema and airway quantitative imaging phenotypes. *Am J Respir Crit Care Med*. 2015;192:559-69.

Thomsen LH, Shaker SB, Dirksen A, et al. Correlation between emphysema and lung function in healthy smokers and smokers with COPD. *J COPD F*. 2015;2(3):204-13.

## Biomarkers

Lomas DA, Silverman EK, Edwards LD, et al. Evaluation of serum CC-16 as a biomarker for COPD in the ECLIPSE cohort. *Thorax*. 2008;63(12):1058-63.

Lomas DA, Silverman EK, Edwards LD, et al. Serum surfactant protein D is steroid sensitive and associated with exacerbations of COPD. *Eur Respir J*. 2009;34(1):95-102.

Singh D, Edwards L, Tal-Singer R, et al. Sputum neutrophils as a biomarker in COPD: findings from the ECLIPSE study. *Respir Res*. 2010;11:77.

Dickens JA, Miller BE, Edwards LD, et al. COPD association and repeatability of blood biomarkers in the ECLIPSE cohort. *Respir Res*. 2011;12:146.

Duvoix A, Miller B, Tal-Singer R, et al. The development of biomarkers for chronic obstructive pulmonary disease: the ECLIPSE study. *Clin Lab Intl*. 2011.

Duvoix A, Miranda E, Perez J, et al. Evaluation of full-length, cleaved and nitrosylated serum surfactant protein D as biomarkers for COPD. *COPD*. 2011;8(2):79-95.

Esther CR Jr, Lazaar AL, Bordonali E, et al. Elevated airway purines in COPD. *Chest*. 2011;140(4):954-60.

MacNee W, Rennard SI, Hunt JF, et al. Evaluation of exhaled breath condensate pH as a biomarker for COPD. *Respir Med*. 2011;105(7):1037-45.

Sin DD, Miller B, Duvoix A, et al. Serum PARC/CCL-18 concentrations and health outcomes in Chronic Obstructive Pulmonary Disease. *Am J Respir Crit Care Med*. 2011;183(9):1187-92.

Agustí A, Edwards LD, Rennard SI, et al. Persistent systemic inflammation is associated with poor clinical outcomes in COPD: a novel phenotype. *PLoS One*. 2012;7(5):e37483.

Breyer MK, Rutten E, Locantore N, et al. Dysregulated adipokine metabolism in chronic obstructive pulmonary disease. *Eur J Clin Invest*. 2012;42(9):983-91.

Celli BR, Locantore N, Yates J, et al. Inflammatory biomarkers improve clinical prediction of mortality in chronic obstructive pulmonary disease. *Am J Respir Crit Care Med*. 2012;185(10):1065-72.

Ubhi BK, Cheng KK, Dong J, et al. Targeted metabolomics identifies perturbations in amino acid metabolism that sub-classify patients with COPD. *Mol Biosyst*. 2012;8(12):3125-33.

Ubhi BK, Riley JH, Shaw PA, et al. Metabolic profiling detects biomarkers of protein degradation in COPD patients. *Eur Respir J*. 2012;40(2):345-55.

Berg I, Hanson C, Sayles H, et al. Vitamin D, Vitamin D Binding Protein, Lung Function and Structure in COPD. *Respir Med*. 2013;107(10):1578-88.

Cheng D, Kim D, Cockayne D, et al. Systemic soluble receptor for advanced glycation endproducts is a biomarker of emphysema and associated with AGER genetic variants in patients with chronic obstructive pulmonary disease. *Am J Respir Crit Care Med*. 2013;188(8):948-5.

Lazaar AL, Miller BE, Francombe G, et al. No TWEAK for COPD. *Eur Respir J*. 2013;42:1142-44.

Rutten EPA, Calverley PMA, Casuburi R, et al. Changes in body composition in patients with chronic obstructive pulmonary disease; do they influence patient related outcomes? *Ann Nutr Metab*. 2013;63(3):239-47.

Sumner H, Woodcock A, Kolsum U, et al. Predictors of objective cough frequency in chronic obstructive pulmonary disease. *Am J Respir Crit Care Med*. 2013;187(9):943-9.

Diaz AA, Zhou L, Young TP, et al. Chest CT measures of muscle and adipose tissue in COPD: gender-based differences in content and in relationships with blood biomarkers. *Acad Radiol*. 2014;21(10):1255-61.

Johansson SL, Roberts NB, Schlosser A, et al. Microfibrillar-associated protein 4: a potential biomarker of chronic obstructive pulmonary disease. *Respir Med*. 2014;108(9):1336-44.

Lee JH, Cho MH, Hersh CP, et al. IREB2 and GALC are associated with pulmonary artery enlargement in chronic obstructive pulmonary disease. *Am J Respir Cell Mol Biol*. 2014;52:365-76.

Lee JH, McDonald M-LN, Cho MH, et al. DNAH5 is associated with total lung capacity in chronic obstructive pulmonary disease. *Resp Res*. 2014;15(1):97.

Singh D, Kolsum U, Brightling CE, et al. Eosinophilic inflammation in COPD: prevalence and clinical characteristics. *Eur Respir J*. 2014;44(6):1697-700.

Wells JM, O'Reilly PJ, Szul T, et al. An aberrant leukotriene A4 hydrolase–proline-glycine-proline pathway in the pathogenesis of chronic obstructive pulmonary disease. *Am J Respir Crit Care Med*. 2014;190(1):51-61.

Williams MC, Murchison JT, Edwards LD, et al. Coronary artery calcification is increased in patients with COPD and associated with morbidity and mortality. *Thorax*. 2014;69(8):718-23.

Ongay S, Sikma M, Horvatovich P, et al. Free urinary desmosine and isodesmosine as COPD biomarkers: the relevance of confounding factors. *Chronic Obstr Pulm Dis*. 2016;3(2):560-9.

Rabinovich RA, Miller BE, Wrobel K, et al. Circulating desmosine levels do not predict emphysema progression but are associated with cardiovascular risk and mortality in COPD. *Eur Respir J*. 2016;47(5):1365-73.

Sand JM, Leeming DJ, Byrjalsen I, et al. High levels of biomarkers of collagen remodelling are associated with increased mortality in COPD-results from the ECLIPSE study. *Respir Res*. 2016;17(1):125.

Leeming DJ, Byrjalsen I, Sand JM, et al. Biomarkers of collagen turnover are related to annual change in FEV<sub>1</sub> in patients with chronic obstructive pulmonary disease within the ECLIPSE study. *BMC Pulm Med*. 2017;17(1):164.

## Protocol

Vestbo J, Anderson W, Coxson HO, et al. Evaluation of COPD longitudinally to identify predictive surrogate end-points (ECLIPSE). *Eur Respir J*. 2008;31(4):869-73.

Yohannes AM, Müllerová H, Hanania NA, et al. Long-term course of depression trajectories in patients with COPD: a 3-year follow-up analysis of the evaluation of COPD longitudinally to identify predictive surrogate endpoints cohort. *Chest*. 2016;149(4):916-26.

## Reviews

Faner R, Tal-Singer R, Riley JH, et al. Lessons from ECLIPSE: a review of COPD biomarkers. *Thorax*. 2014;69(7):666-72.

Vestbo J, Agustí A, Wouters EFM, et al. Should we view COPD differently after ECLIPSE? A clinical perspective from the study team. *Am J Respir Crit Care Med*. 2014;189(9):1022-30.

Huang JT, Bolton CE, Miller BE, et al. Age-dependent elastin degradation is enhanced in chronic obstructive pulmonary disease. *Eur Respir J*. 2016;48(4):1215-8.

Papi A, Magnoni MS, Muzzio CC, et al. Phenomenology of COPD: interpreting phenotypes with the ECLIPSE study. *Monaldi Arch Chest Dis*. 2016;83(1-2):721.

## Systems Biology

Chu J-H, Hersh C, Castaldi P, et al. Analyzing networks of phenotypes in complex diseases: methodology and applications in COPD. *BMC Syst Biol*. 2014;8(1):78.

Rennard SI, Locantore N, Delafont B, et al. Identification of five COPD subgroups with different prognoses in the ECLIPSE cohort using cluster analysis. *Ann Am Thorac Soc*. 2015;12(3):303-12.

González G, Ash SY, Vegas-Sánchez-Ferrero G, et al. Disease staging and prognosis in smokers using deep learning in chest computed tomography. *Am J Respir Crit Care Med*. 2018;197(2):193-203.

Note that publications of secondary analyses of the ECLIPSE cohort are ongoing and additional detail can be found at <http://www.eclipse-copd.com/>.

## Appendix E6

### COPD Gene Investigator Directory

#### Administrative Center

James D. Crapo, MD

Edwin K. Silverman, MD, PhD

Gisselle Gonzalez

Kelley Madden

Barry J. Make, MD

Emily Port

Elizabeth A. Regan, MD, PhD

Joshua Ryon

Lori Stepp

Shandi Watts, MS

Michael Weaver

**Executive Committee**

Terri Beaty, PhD

Russell P. Bowler, MD, PhD

James D. Crapo, MD

Jeffrey L. Curtis, MD

Douglas Everett, PhD

MeiLan K. Han, MD, MS

John E. Hokanson, MPH, PhD

David A. Lynch, MB

Barry J. Make, MD

Elizabeth A. Regan, MD, PhD

Edwin K. Silverman, MD, PhD

**External Advisory Committee**

Gary Anderson, PhD

Eugene R. Bleecker, MD

Harvey O. Coxson, PhD

Ronald G. Crystal, MD

James C. Hogg, MD

Michael A. Province, PhD

Stephen I. Rennard, MD

**NHLBI**

Thomas Croxton, MD, PhD

Weiniu Gan, PhD

Lisa A. Postow, PhD

Lisa M. Viviano, BSN

COPD Foundation

Corinne Costa Davis

Elisha Malanga



Delia Prieto

Biorepository Visit 1 (Baltimore)

Homayoon Farzadegan, PhD

Akila Hadji

**Biorepository Visit 2 (Boston)**

Leena Sathe, PhD

Data Coordinating Center

Director: Douglas Everett, PhD

Grace Chen

James Crooks, PhD

Ruthie Knowles, MSW, CCRP

Katherine Pratte, PhD

Matthew J. Strand, PhD

Carla Wilson, MS

Pearlann T. Zelarney, MS

**National Jewish Analysis Group**

James D. Crapo, MD

Russell P. Bowler, MD, PhD

Katerina J. Kechris, PhD

Sonia Leach, PhD

Elizabeth A. Regan, MD, PhD

Ryan J. Webster, MD

**Epidemiology Center**

Director: John E. Hokanson, MPH, PhD

Erin E. Austin, PhD

Annika Czizik

Gregory Kinney, MPH, PhD

Yisha Li

Sharon M. Lutz, MPH, PhD

Margaret F. Ragland, MD, MS

Kendra A. Young, MSPH, PhD

Sequencing and Bioinformatics Center

Director: Michael Cho, MD  
Peter J. Castaldi, MD, MSc  
Kimberly Glass, PhD  
Craig Hersh, MD, MPH  
Wonji Kim, PhD  
Yang-Yu Liu, PhD  
Edwin K. Silverman, MD, PhD  
*Genotyping Centers*

### **Genome-Wide Center**

Director: Terri Beaty, PhD  
Candidate Genotyping Center  
Craig P. Hersh, MD, MPH  
Edwin K. Silverman, MD, PhD

### **Genetic Analysis Center**

Director: Edwin K. Silverman, MD, PhD  
Terri Beaty, PhD  
Christopher J. Benway, PhD  
Jacqueline Bidinger, MS  
Peter J. Castaldi, MD, MSc  
Michael H. Cho, MD  
Douglas Conrad, MD  
Dawn L. DeMeo, MD, MPH  
Adel R. El-Boueiz, MD  
Marilyn G. Foreman, MD, MS  
Nadia N. Hansel, MD, MPH  
Lystra P. Hayden, MD  
Craig Hersh, MD, MPH  
Brian Hobbs, MD  
Wonji Kim, PhD  
Woori Kim, MPH  
Christoph Lange, PhD  
Sharon M. Lutz, MPH, PhD

Merry-Lynn McDonald, PhD

Matthew Moll, MD

Melody Morris, PhD

Nikolaos A. Patsopoulos, MD, PhD

Dandi Qiao, PhD

Elizabeth A. Regan, MD, PhD

Emily S. Wan, MD

### **Imaging Center**

Director: David A. Lynch, MB

Harvey O. Coxson, PhD

Jennifer G. Dy, PhD

Sean B. Fain, PhD

Shoshana Ginsburg, MS

Eric A. Hoffman, PhD

Stephen Humphries, PhD

Philip F. Judy, PhD

Alex Kluiber

Stefanie Mason, MD

Andrea Oh, MD

Clare Poynton, MD, PhD

Joseph M. Reinhardt, PhD

James Ross, PhD

Raul San Jose Estepar, PhD

Joyce D. Schroeder, MD

Arkadiusz Sitek, Ph.D.

Robert M. Steiner, MD

Edwin van Beek, MD, PhD, MEd

Bram van Ginneken, PhD

Eva van Rikxoort, PhD

George R. Washko, MD

### **PFT QA Center**

Robert Jensen, PhD

## **Committees**

### *Ancillary Studies and Publication Committee*

Co-Chair: James D. Crapo, MD

Co-Chair: John E. Hokanson, MPH, PhD

Surya P. Bhatt, MD

Peter J. Castaldi, MD, MSc

Jeffrey L. Curtis, MD

Dawn L. DeMeo, MD, MPH

Doug Everett, PhD

MeiLan K. Han, MD, MS

Craig P. Hersh, MD, MPH

Stephen Humphries, PhD

Victor Kim, MD

David A. Lynch, MB

Barry J. Make, MD

Nirupama Putcha, MD, MHS

Elizabeth A. Regan, MD, PhD

Edwin K. Silverman, MD, PhD

Matthew J. Strand, PhD

Carla Wilson

### *Death Adjudication Committee*

Chair: MeiLan Han, MD

Surya P. Bhatt, MD

Jessica Bon, MD

Alejandro A. Diaz, MD, MPH

Doug Everett, PhD

Barry J. Make, MD

Elizabeth Regan, MD, PhD

Carla Wilson

### *Industry Advisory Committee*

#### *AstraZeneca*

Raolat Abdulai, MD, MMSc

François-Xavier Blé

Jean-Marc Euksuzian, PharmD, RPh

Malin Fagerås, PhD

Angus Hamblin

Megan E. Hardin, MD

Xiang (Jay) Ji

Ubaldo Martin, MD

Kelly Celuch Montalto, PharmD

Sarah S. Moyle, PhD

Lars H. Nordenmark, PhD

Gerald O'Brien, MD

Arpan Patel, PharmD

Adam Platt

Stephen Rennard, MD

Olga B. Ryan, MPH

Frank Trudo

Simon Young

*Boehringer-Ingelheim*

Dr. Claudia Diefenbach

Anastasia Eleftheraki

Dr. Armin Furtwaengler

Dr. med. Martina Gahlemann

Gokul Gopalan, MD, MPH

Abhya Gupta, PhD

Dr. Harald Koegler

Bérengère Langellier, MSc

Thomas Leonard, PhD

Cathy Mahle, PhD, MBA

Sheri Rogers

Asif Shaikh, MD, MPH

Carlos Tafur

Dr. Florian Voß

Dr. Lam (Lillian) Yau

*GSK*

Julia R. DiBello, PhD  
Soumitra Ghosh, MD, PhD  
Sarah H. Landis, PhD  
Dr. Nicholas Locantore  
Michal Magid-Slav, MSc, MBA  
Ruth J. Mayer, PhD  
David Mayhew, PhD  
Bruce E. Miller, PhD  
Hana Müllerov., PharmD, PhD  
Leah Sansbury, PhD, MSPH  
Robert Suruki, ScD  
Dr. Ruth Tal-Singer  
Melissa K. VanDyke, PhD, MPH  
Julie Yates

*MedImmune*

Alison Humbles, PhD  
Paul Newbold, PhD

*Novartis*

Donald Banerji, MD  
Carla MT Bauer, PhD  
Maria L. Figliomeni, PhD  
Robert Fogel, MD  
Sarah Grant, MD  
Shamsah Kazani, MD  
Manijeh Lawrence, PharmD  
Audrey Powell, MD  
Robert M. Strieter, MD  
Anthony Yadao, MD

*Sunovion*

Lily Chan, PharmD  
Thomas Goodin, PhD  
Samantha Koth  
Wilson Liu, PharmD



J'aime Manion, PhD  
Sanjay Sharma, PhD  
Amy Tomasello, PharmD, MPH

### **Longitudinal Follow-up Committee**

Chair: Elizabeth A. Regan, MD, PhD  
Antonio Anzueto, MD  
William C. Bailey, MD  
Jessica Bon, MD  
Russell P. Bowler, MD, PhD  
James D. Crapo, MD  
Gerard J. Criner, MD  
Mark T. Dransfield, MD  
Douglas Everett, PhD  
MeiLan K. Han, MD, MS  
John E. Hokanson, MPH, PhD  
Victor Kim, MD  
Greg Kinney, MPH, PhD  
Barry J. Make, MD  
Kim Sprenger, RN, BS  
Lori Stepp  
Carla Wilson, MS

### **Appendix E7**

#### **Principal Investigators and Centers Participating in ECLIPSE (NCT00292552, 3 SC0104960)**

##### **Bulgaria:**

Y Ivanov, Pleven; K Kostov, Sofia. Canada: J Bourbeau, Montreal; M Fitzgerald, Vancouver; P Hernández, Halifax; K Killian, Hamilton; R Levy, Vancouver; F Maltais, Montreal; D O'Donnell, Kingston. Czech Republic: J Krepelka, Praha. Denmark: J Vestbo, Hvidovre. Netherlands: E Wouters, Horn. New Zealand: D Quinn, Wellington. Norway: P Bakke, Bergen, Slovenia: M Kosnik, Golnik. Spain: A Agusti, Jaume Sauleda, Palma de Mallorca. Ukraine: Y Feschenko, Kiev; V Gavrisyuk, Kiev; L Yashina, W MacNee, Edinburgh; D Singh, Manchester; J Wedzicha, London. USA: A Anzueto, San Antonio, TX; S Braman, Providence, RI; R Casaburi, Torrance CA; B Celli, Boston, MA; G Giessel, Richmond, VA; M Gotfried, Phoenix, AZ; G Greenwald, Rancho Mirage, CA; N Hanaia, Houston, TX; D Mahler, Lebanon, NH; B

Make, Denver, CO; S Rennard, Omaha, NE; C Rochester, New Haven, CT; P Scanlon, Rochester, MN; D Schuller, Omaha, NE; F Scieurba, Pittsburg, PA; A Sharafkhaneh, Houston, TX; T Siler, St Charles, MO; E Silverman, Boston, MA; A Wanner, Miami, FL; R Wise, Baltimore, MD; R ZuWallack, Hartford, CT.

### **Steering Committee:**

H Coxson (Canada), L Edwards (GlaxoSmithKline, USA), R Tal Singer (Cochair, GlaxoSmithKline, USA), D Lomas (UK), W MacNee (UK), E Silverman (USA), C Crim (GlaxoSmithKline, USA), J Vestbo (Cochair, Denmark), J Yates (GlaxoSmithKline, USA).

### **Scientific Committee:**

A Agusti (Spain), P Bakke (Norway), P Calverley (UK), B Celli (USA), C Crim (GlaxoSmithKline, USA), B Miller (GlaxoSmithKline, US), W MacNee (Chair, UK), S Rennard (USA), R Tal-Singer (GlaxoSmithKline, USA), E Wouters (The Netherlands), J Yates (GlaxoSmithKline, USA).

## **Appendix E8**

### **COPD Biomarker Qualification Consortium (CBQC)**

#### **Steering Committee**

Alan Hamilton (alan.hamilton@boehringer-ingenelheim.com)

Bruce Miller bruce.e.miller@gsk.com

Byron Thomashow bthomashow@COPDFoundation.org

Debbie Merrill dmerrill@copdfoundation.org

Fagerås, Malin (Malin.Fageras@astrazeneca.com)

Frank Scieurba (sciurbafc@upmc.edu)

Rennard, Stephen I (srennard@unmc.edu)

Ruth Tal-Singer (rtalsinger@copdfoundation.org)

Stefano Petruzzelli (S.Petruzzelli@chiesi.com)

#### **Imaging Working Group**

Ahmed Halaweish ahmed.halaweish@siemens-healthineers.com

Alan Hamilton alan.hamilton@boehringer-ingenelheim.com

Alex MacKay alex.mackay@astrazeneca.com

Alice Turner (A.M.Turner@bham.ac.uk)

Anna Wysowskyj anna.wysowskyj@boehringer-ingenelheim.com

Bernice Hoppel bhoppel@mru.medical.cannon

Charles Hatt chuckhatt@imbio.com

Crapo, James CrapoJ@NJHealth.org  
Debbie Merrill dmerrill@copdfoundation.org;  
Domenic Crotty Domenic.Crotty@ge.com  
Ekta Dharaiya ekta.shah@philips.com  
Fagerås, Malin (Malin.Fageras@astrazeneca.com)  
Francois-Xavier Ble (Francois-Xavier.Ble@astrazeneca.com)  
Frank Risse (frank.risse@boehringer-ingelheim.com)  
George R. M. D. Washko (GWASHKO@PARTNERS.ORG)  
Jered Sieren Jered-sieren@uiowa.edu  
Julie Yates julie.c.yates@gsk.com  
Lars Nordenmark Lars.Nordenmark@astrazeneca.com  
Lynch, David LynchD@NJHealth.org  
Miranda Kirby miranda.kirby@hli.ubc.ca  
Noushin Brealey noushin.s.brealey@gsk.com  
Patrick Wire (Patrick.D.Wire@gsk.com)  
Philipp Hoelzer philipp.hoelzer@siemens-healthineers.com  
Rennard, Stephen I (srennard@unmc.edu)  
Rob Stockley (Rob.Stockley@uhb.nhs.uk)  
Robert Brown (rbrown@jhmi.edu)  
Ruth Tal-Singer (rtalsinger@copdfoundation.org)  
Samuel Yoffe Ash (syash@bwh.harvard.edu)  
Sandra Stapleton sstapleton@vidadiagnostics.com  
Frank Sciurba sciurba@upmc.edu  
Sean Fain sfain@wisc.edu  
Stephen Humphries humphriesS@NJHealth.org  
Susan Wood susan@vidadiagnostics.com  
Ubaldo Martin ubaldo.martin@astrazeneca.com
